# Supplementary material
Source: publisher figshare collection journal article supplement (https://sage.figshare.com/ndownloader/files/16320923)
Supplement: Supplementary file 1 [file 16320923]

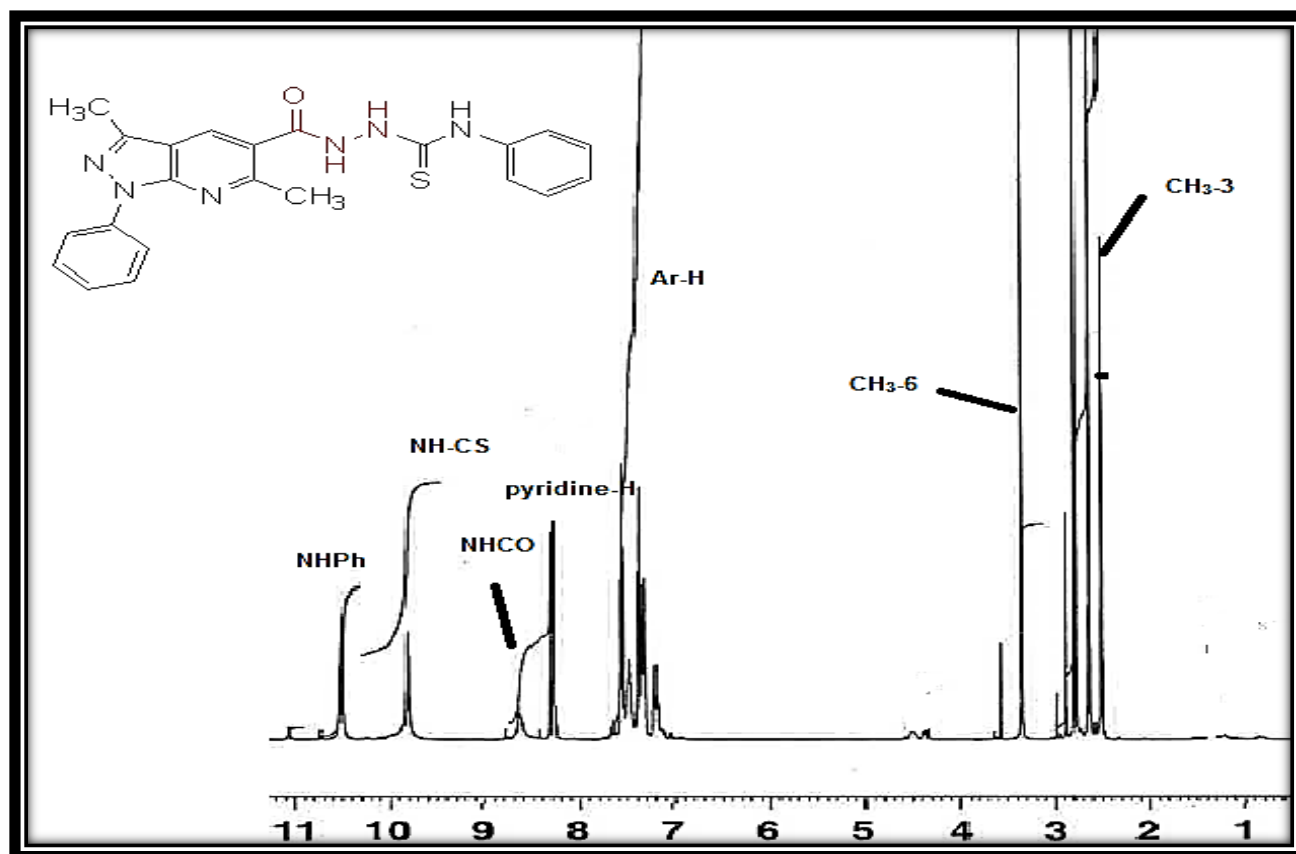

Figure 1. <sup>1</sup>H NMR spectrum of compound 6a

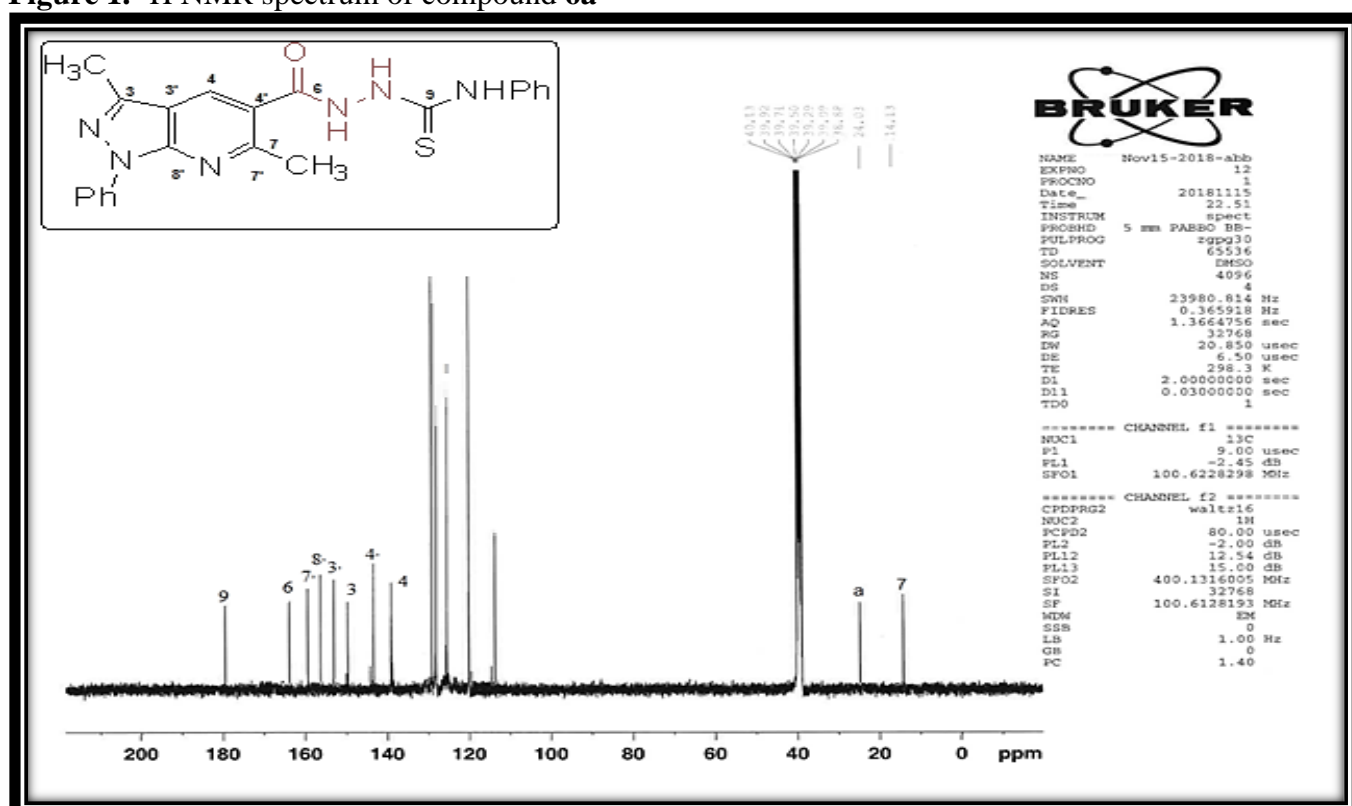

Figure 2. <sup>13</sup>C NMR spectrum of compound 6a

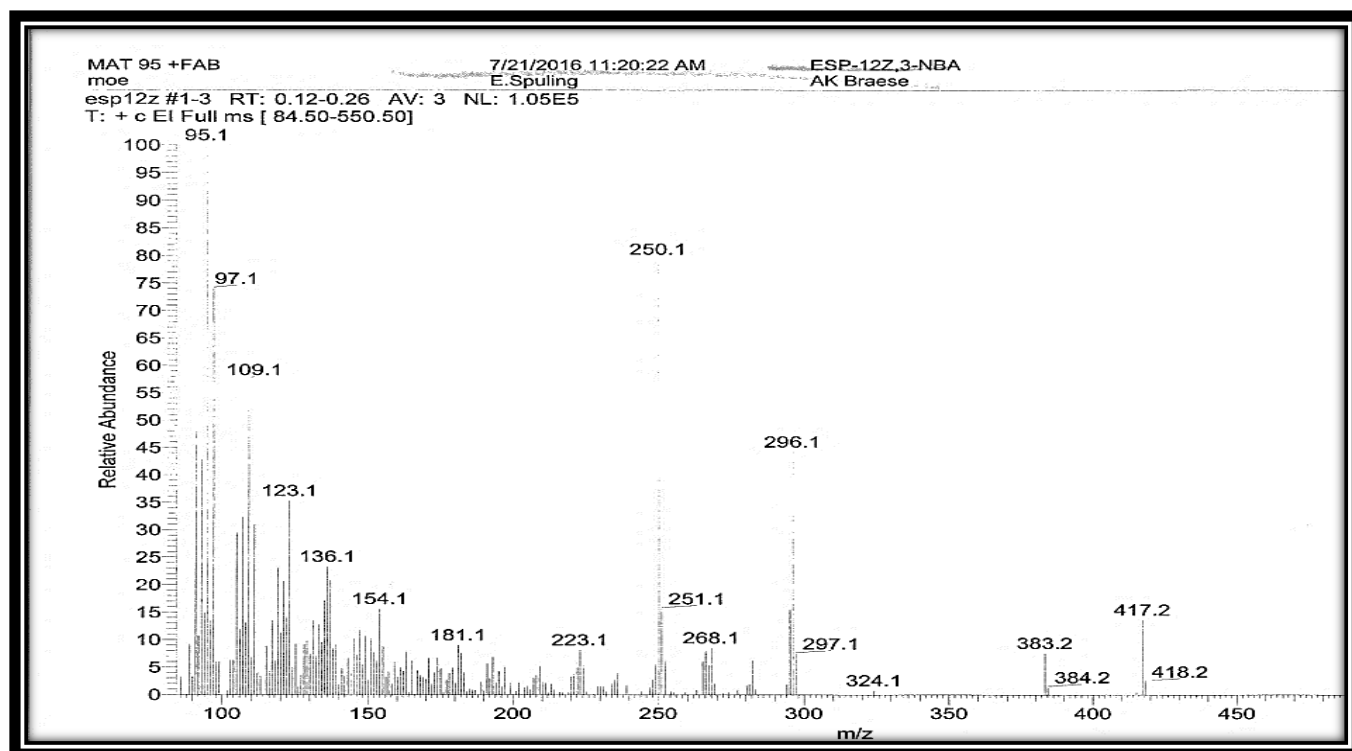

Figure 3. Mass spectrum of compound 6a

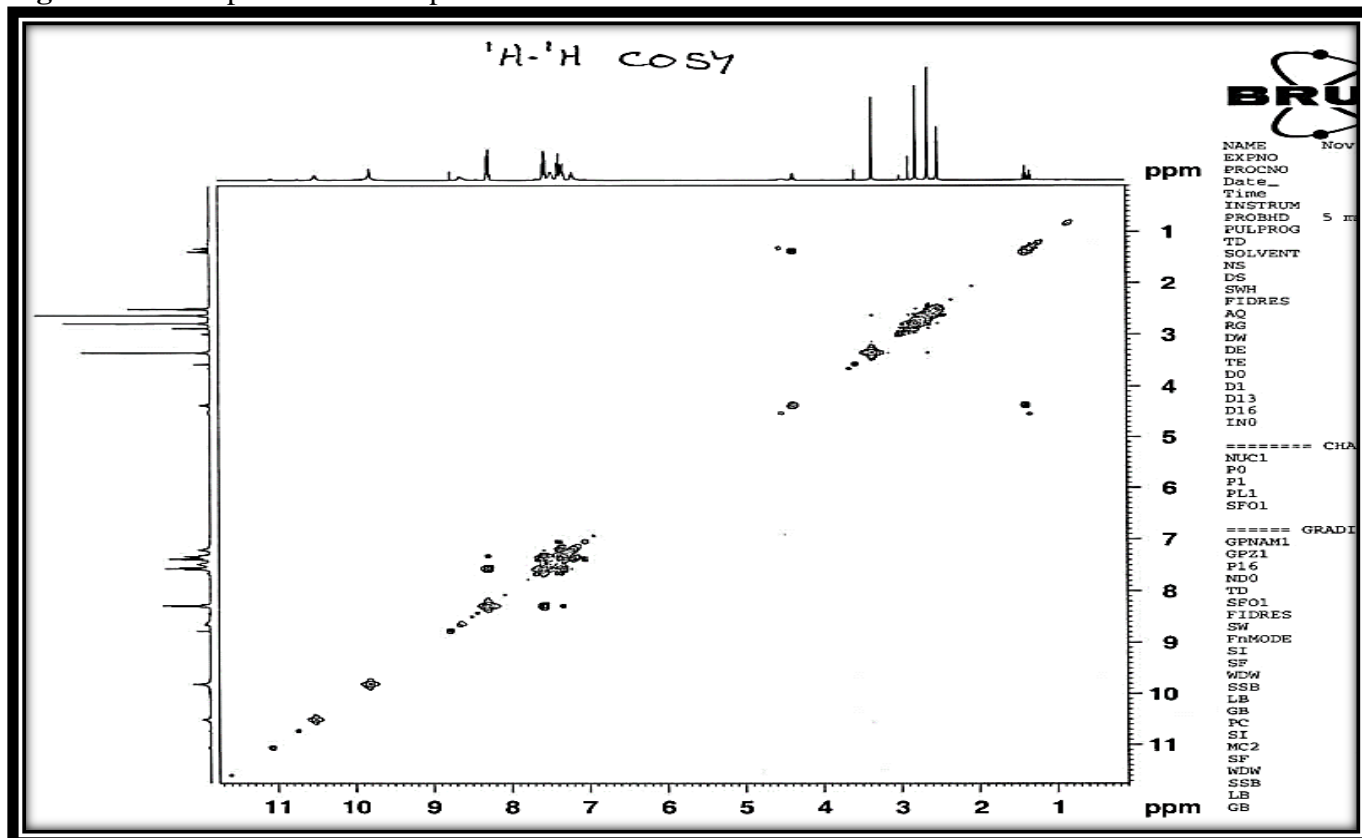

Figure 4.  $^1\text{H}$ - $^1\text{H}$  COSY spectrum of compound 6a

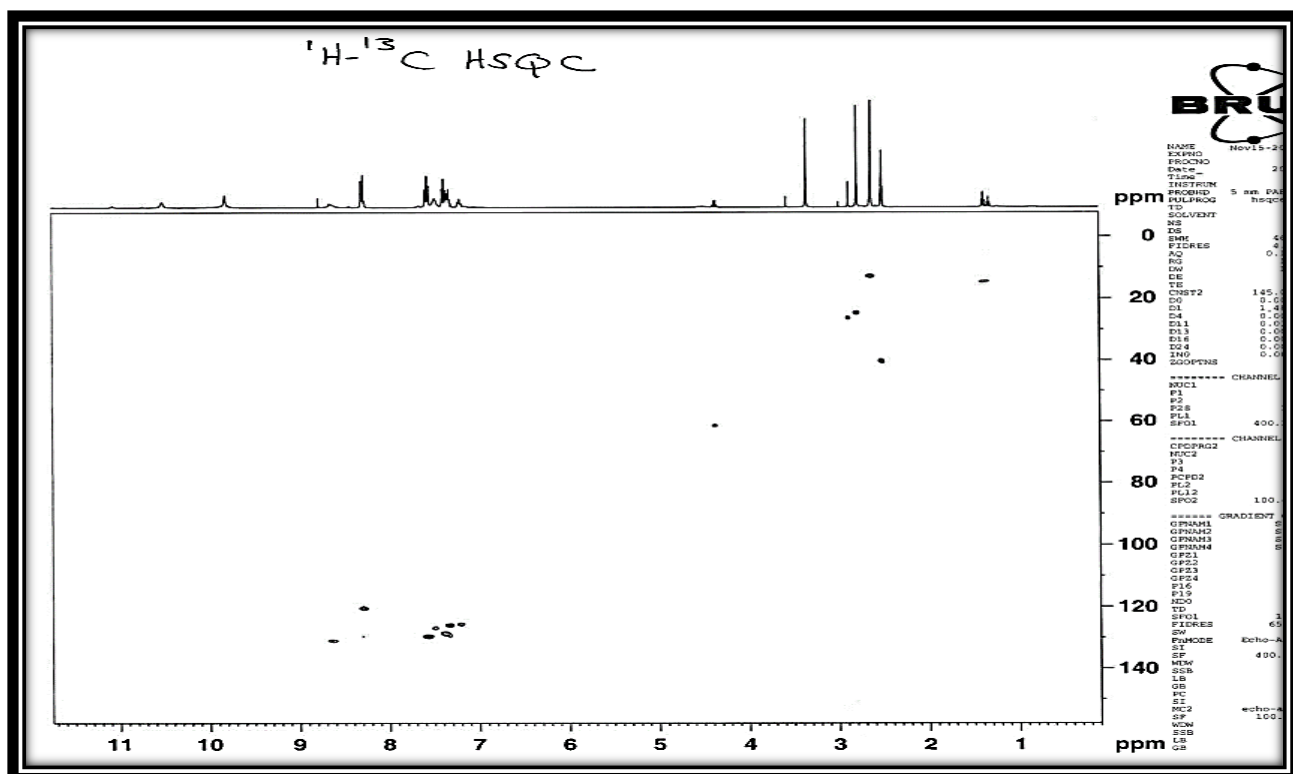

Figure 5.  $^1\text{H}$ - $^{13}\text{C}$  HSQC spectrum of compound 6a

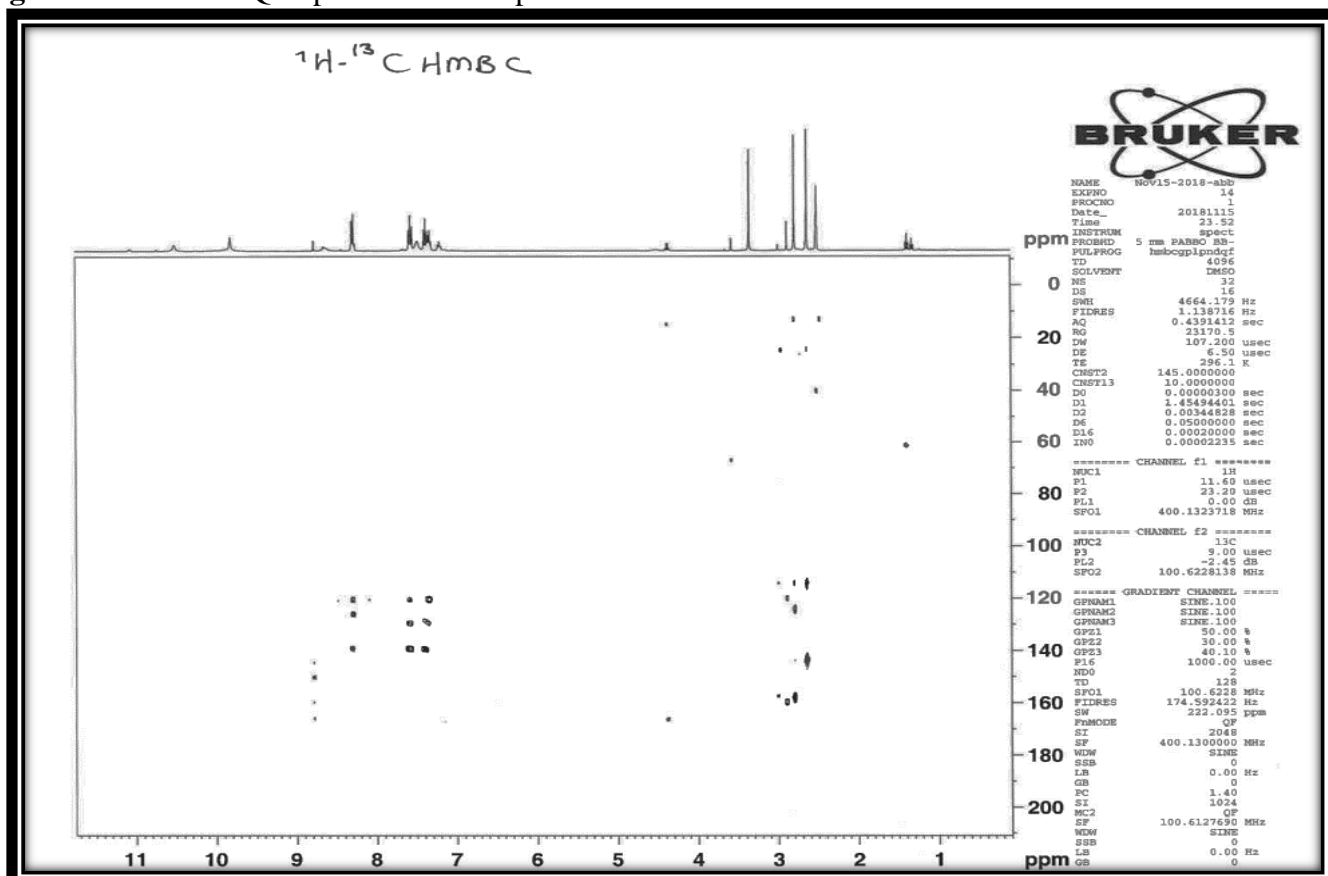

Figure 6.  $^1\text{H}$ - $^{13}\text{C}$  HMBC spectrum of compound 6a

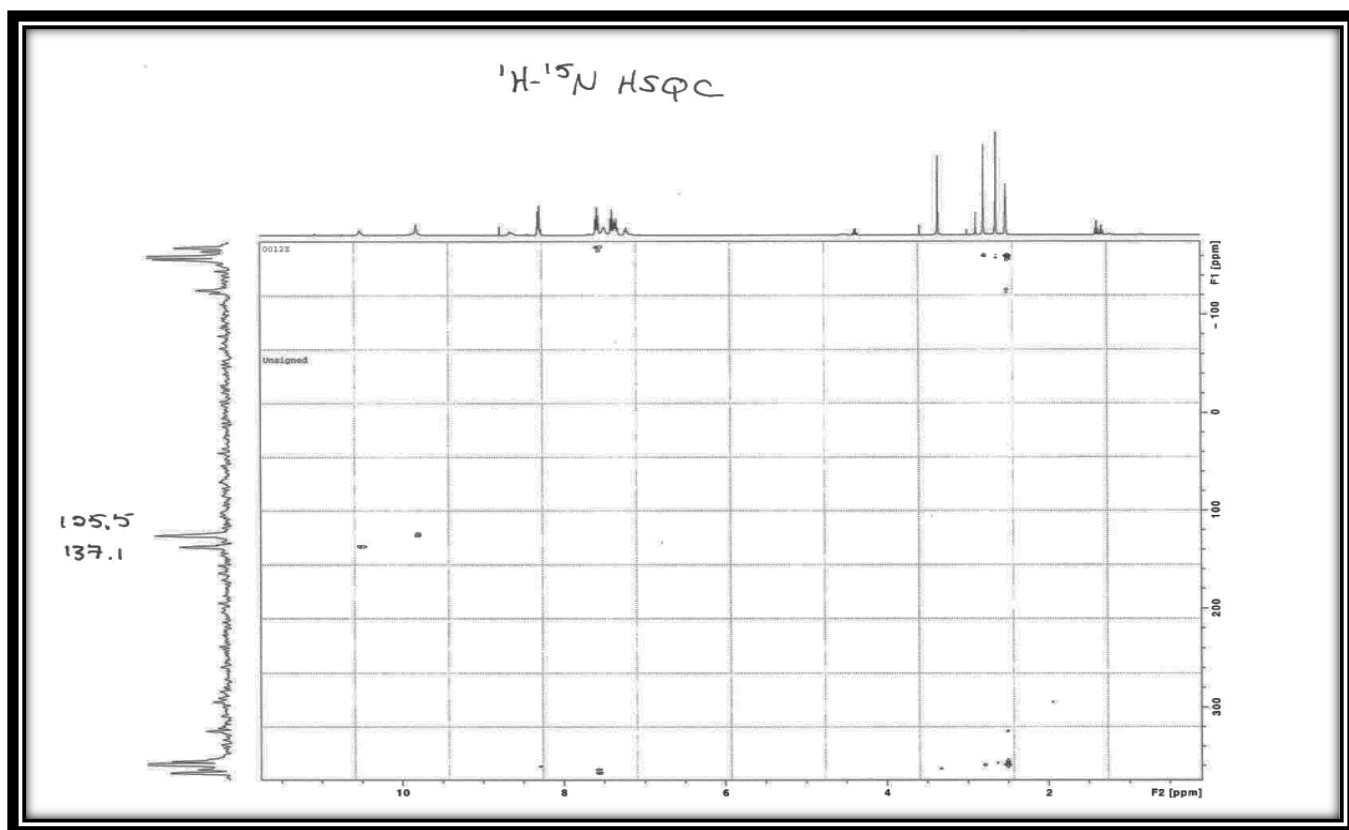

Figure 7.  $^1\text{H}$ - $^{15}\text{N}$  HSQC spectrum of compound **6a**

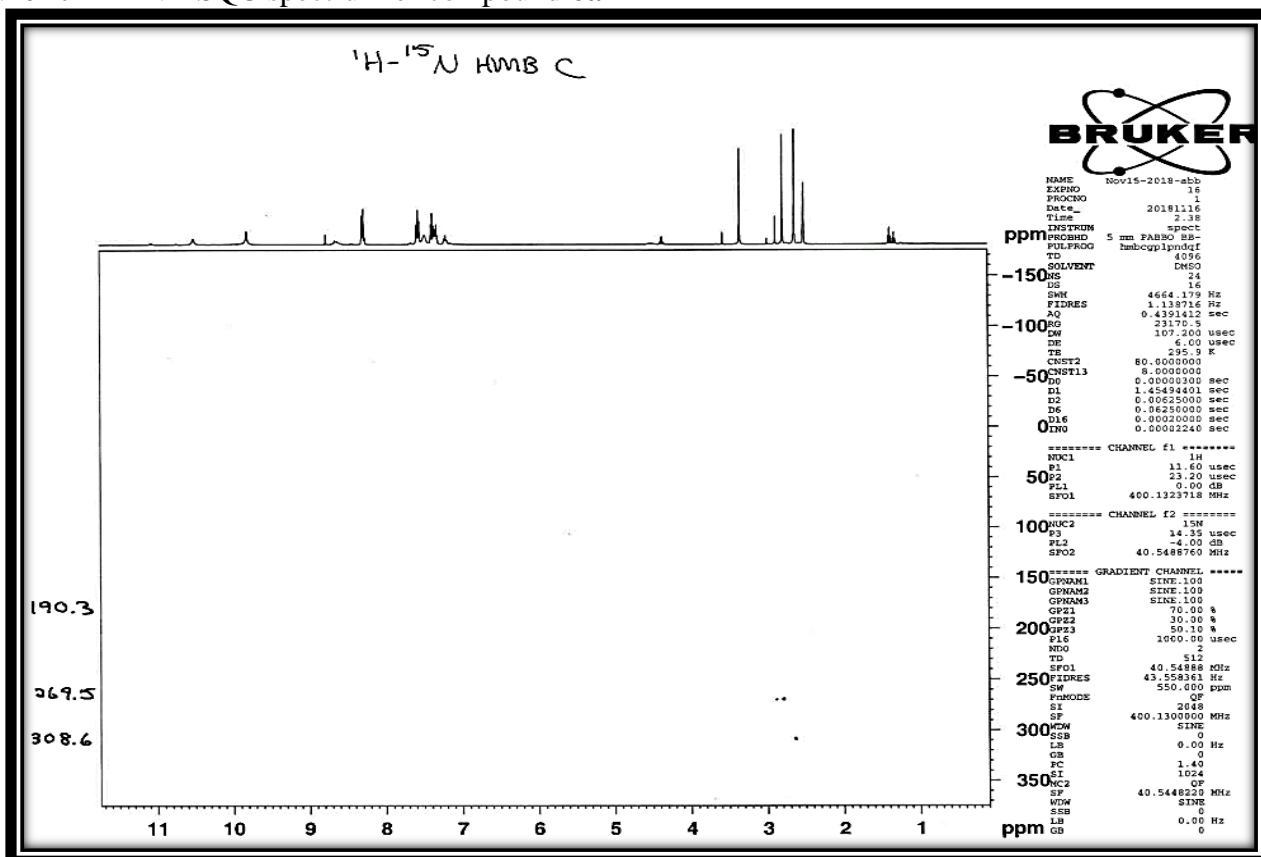

Figure 8.  $^1\text{H}$ - $^{15}\text{N}$  HMB C spectrum of compound **6a**

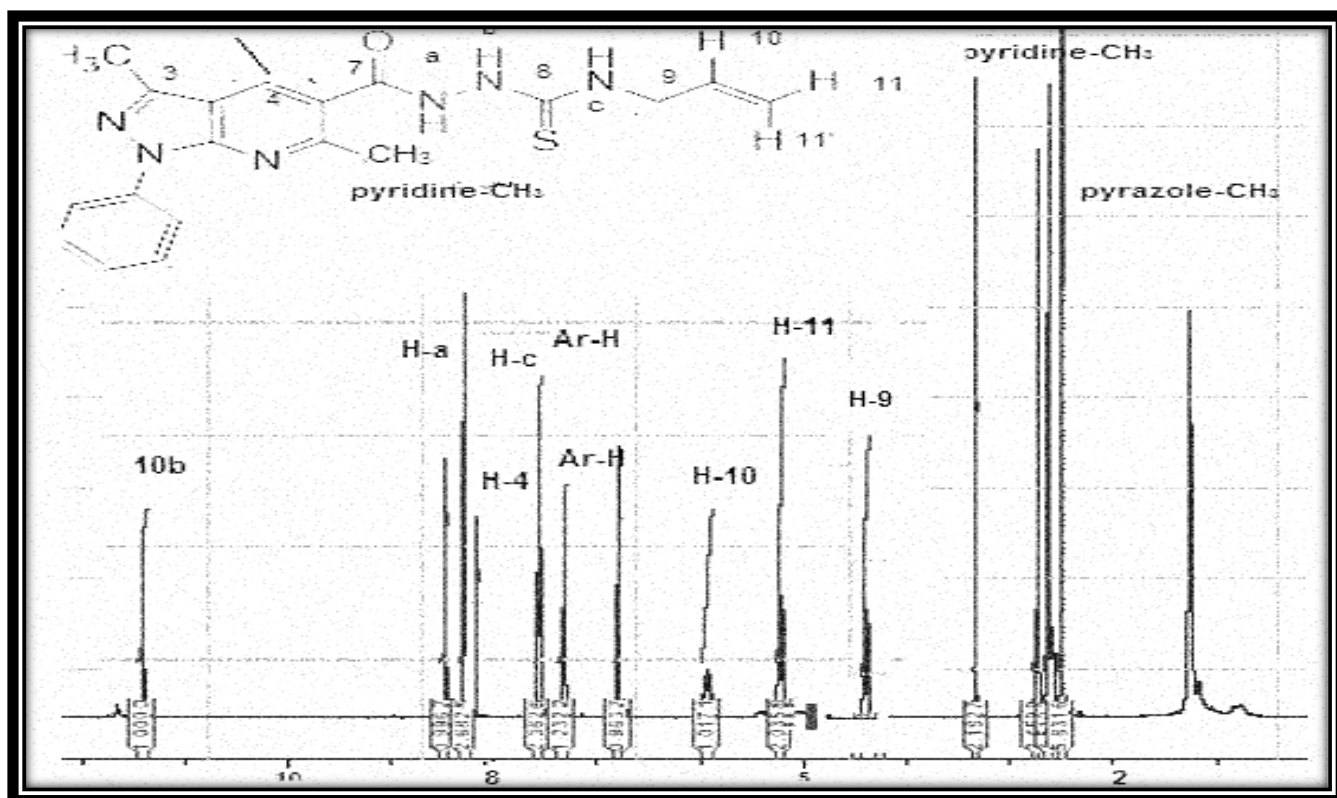

Figure 9.  $^1\text{H}$  NMR of compound 6b

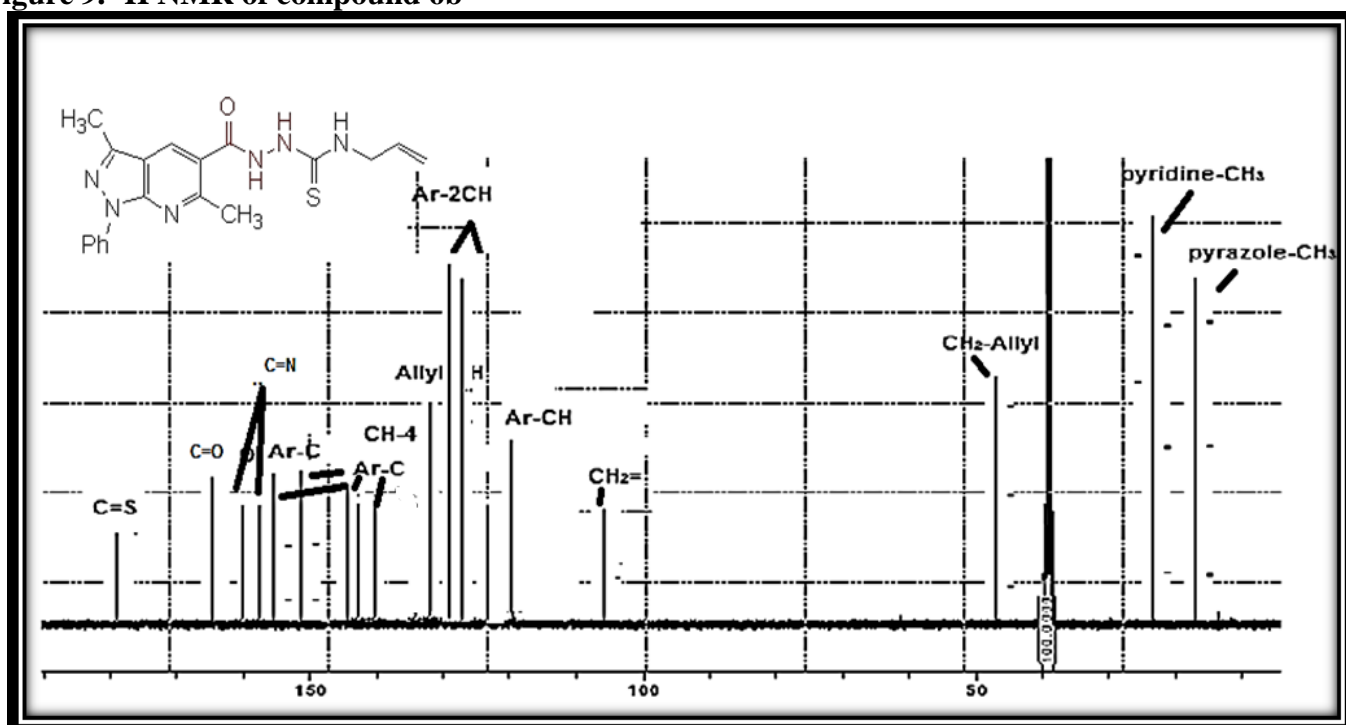

Figure 10.  $^{13}\text{C}$  NMR of compound 6b

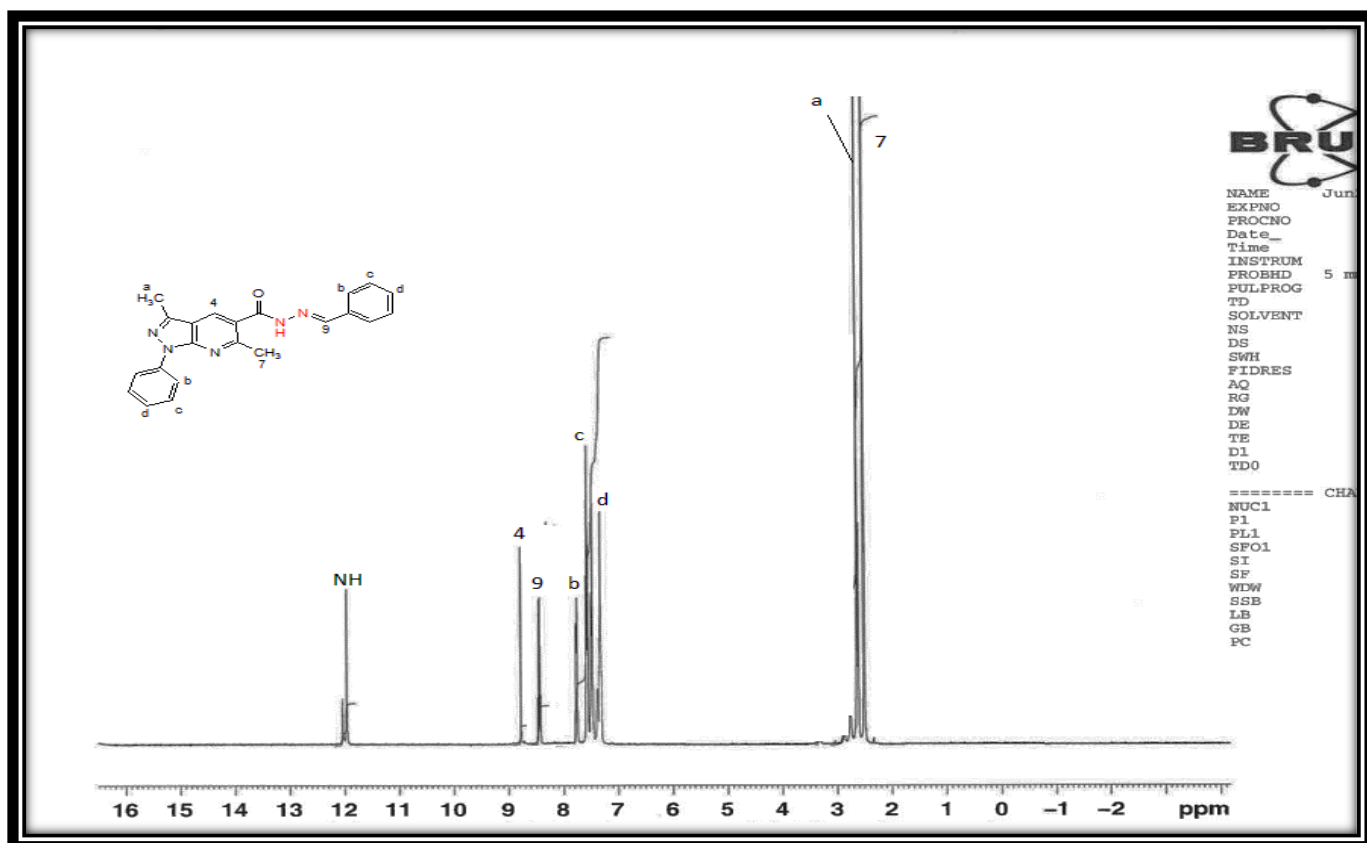

Figure 11.  $^1\text{H}$  NMR spectrum of compound 8a

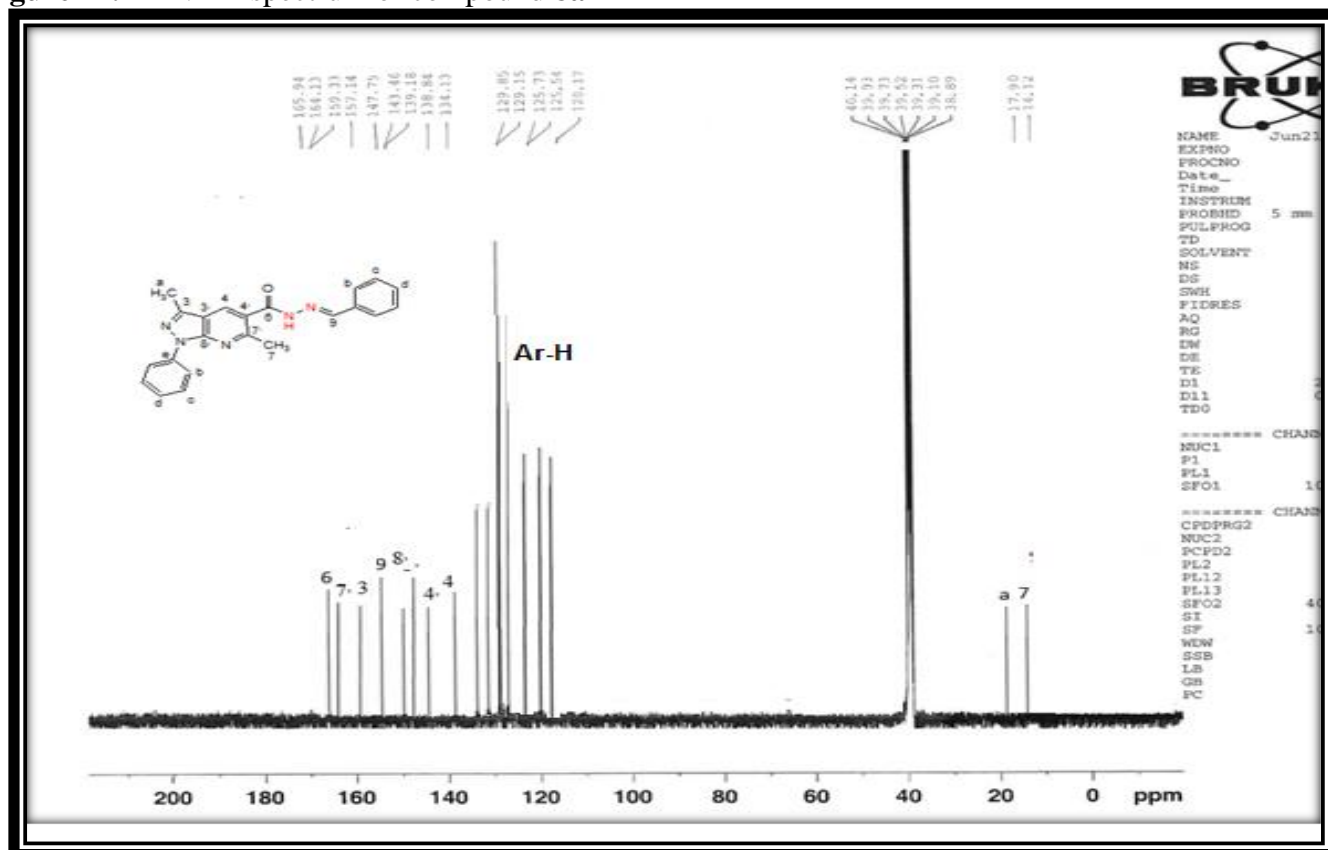

Figure 12.  $^{13}\text{C}$  NMR spectrum of compound 8a



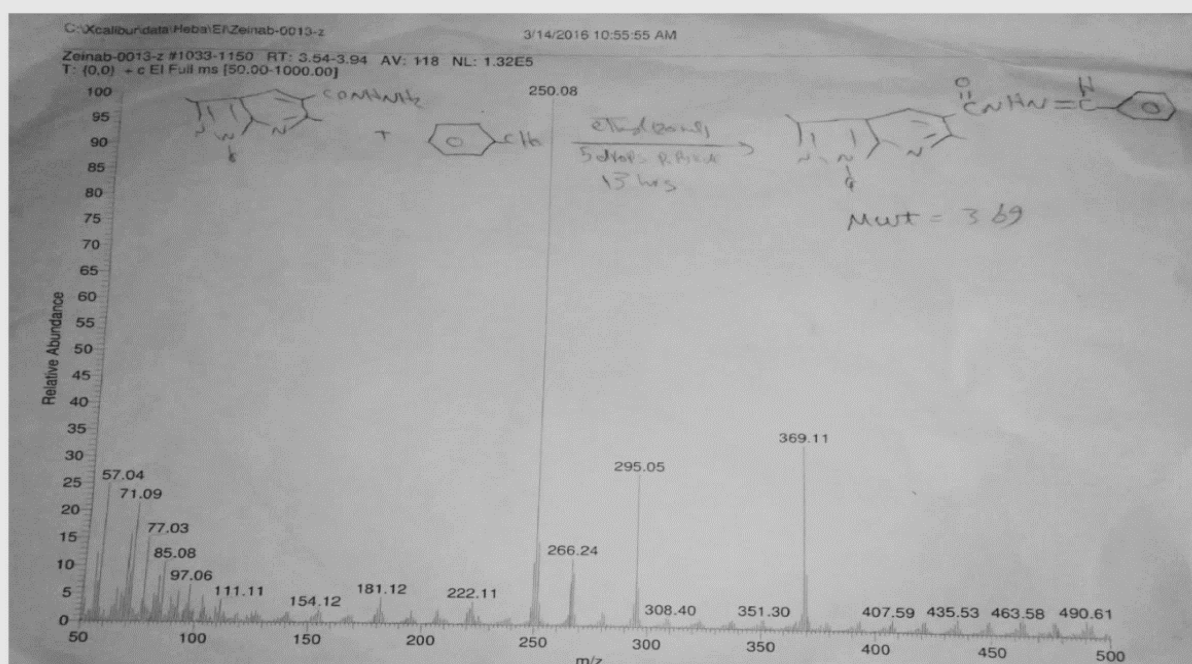

Figure 13. Mass spectrum of compound 8a

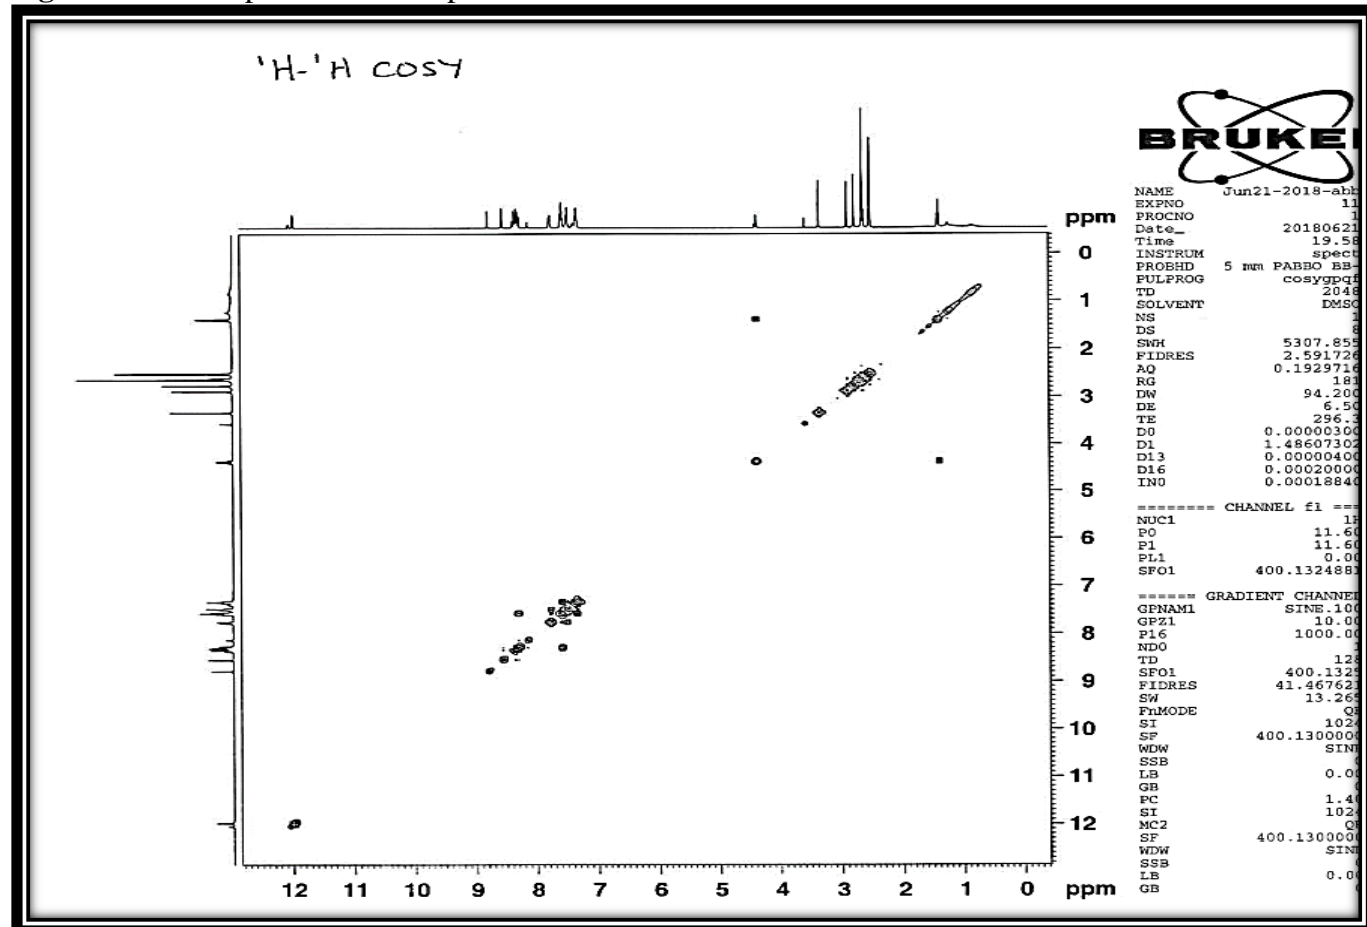

Figure 14. <sup>1</sup>H-<sup>1</sup>H COSY spectrum of compound 8a

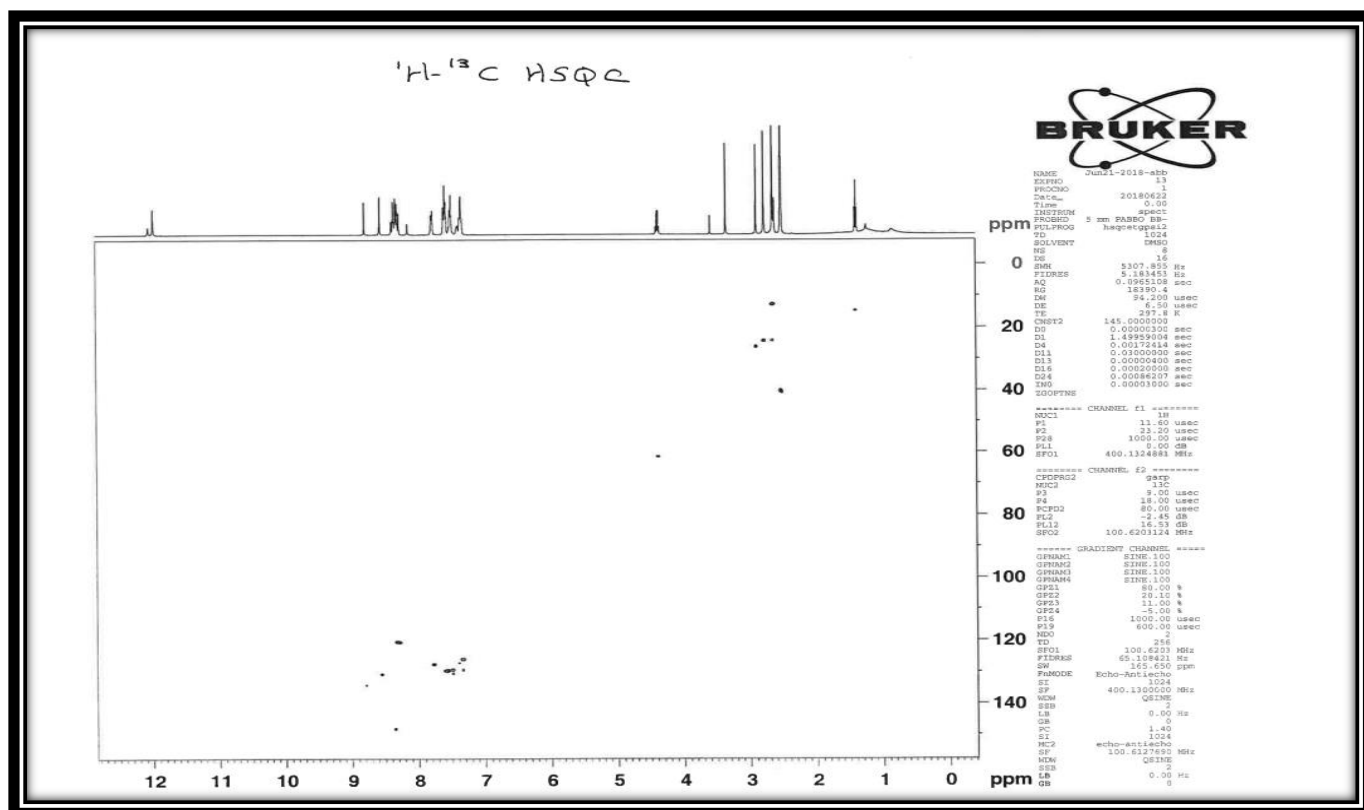

Figure 15.  $^1\text{H}$ - $^{13}\text{C}$  HSQC spectrum of compound **8a**

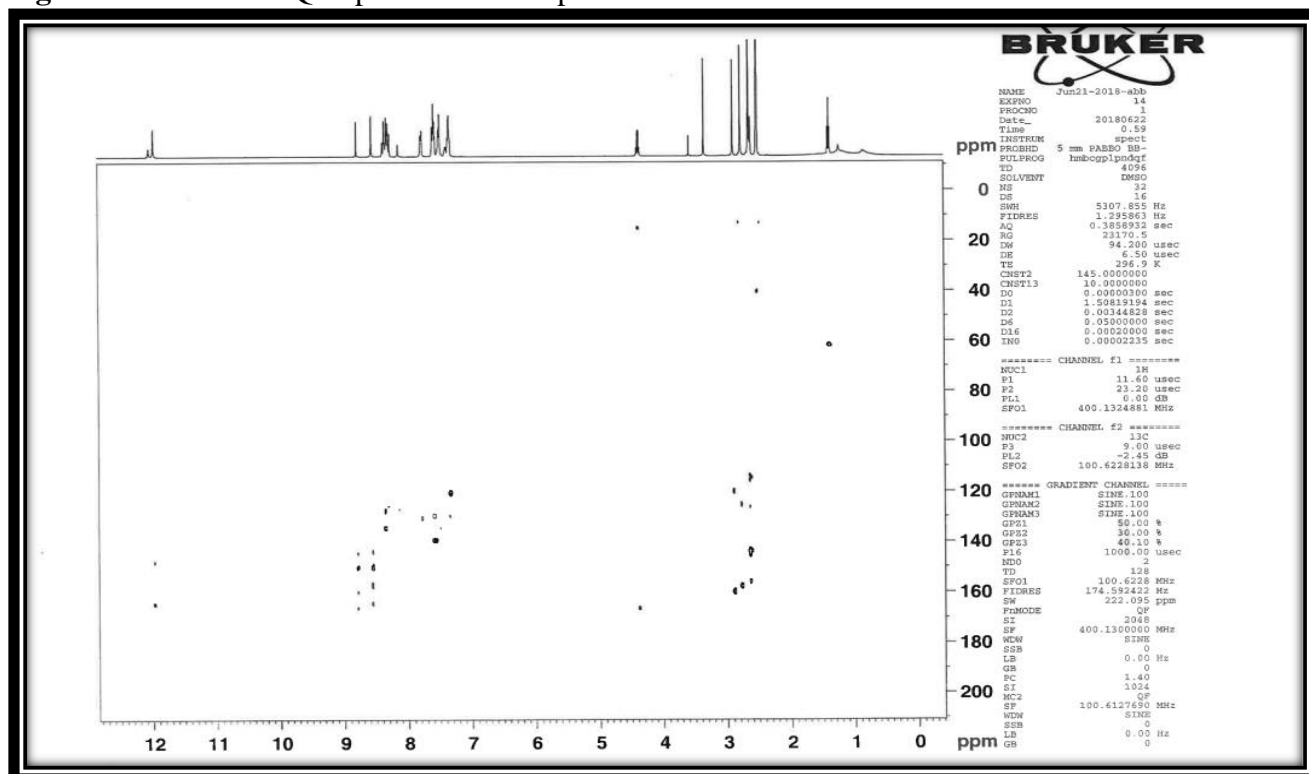

Figure 16.  $^1\text{H}$ - $^{13}\text{C}$  HMBC spectrum of compound **8a**





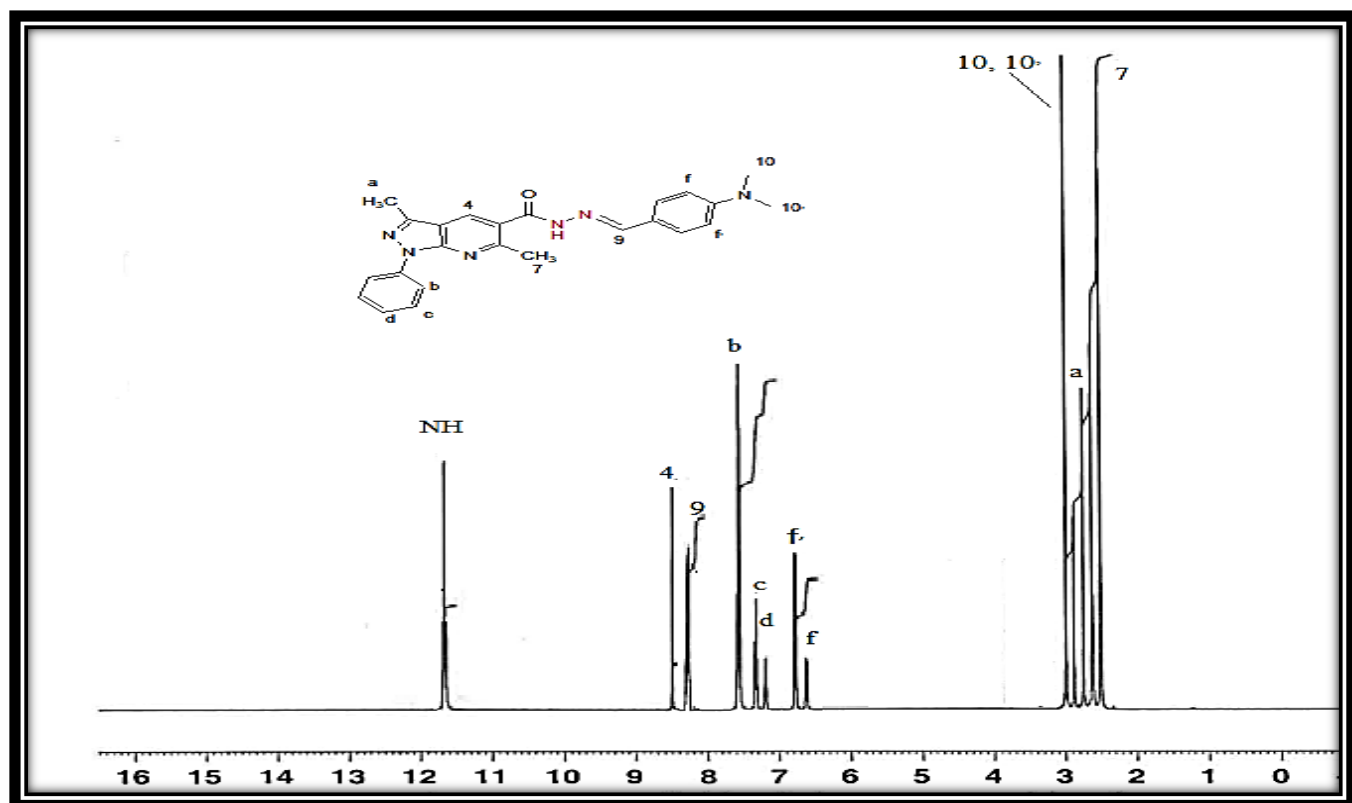

Figure 19.  $^1\text{H}$  NMR spectrum of compound **8b**

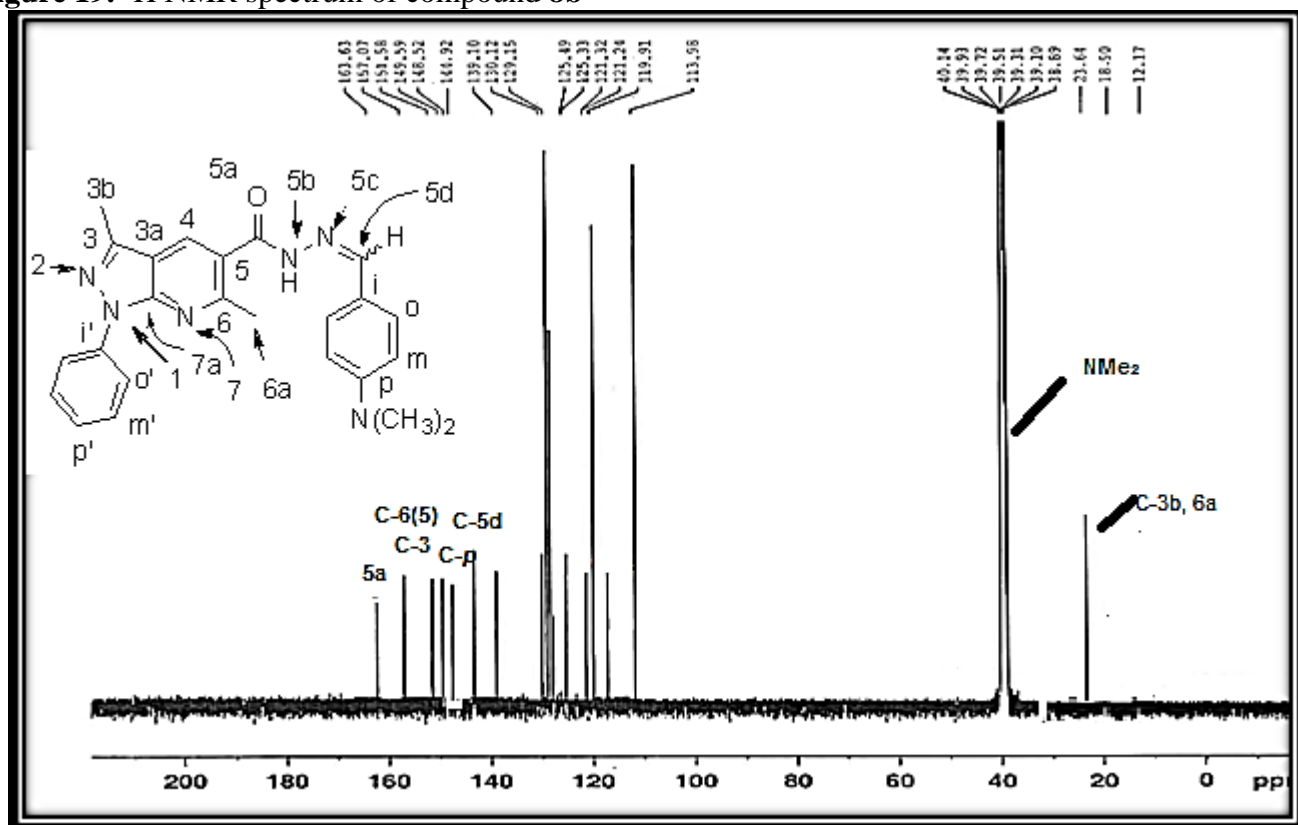

Figure 20.  $^{13}\text{C}$  NMR spectrum of compound **8b**

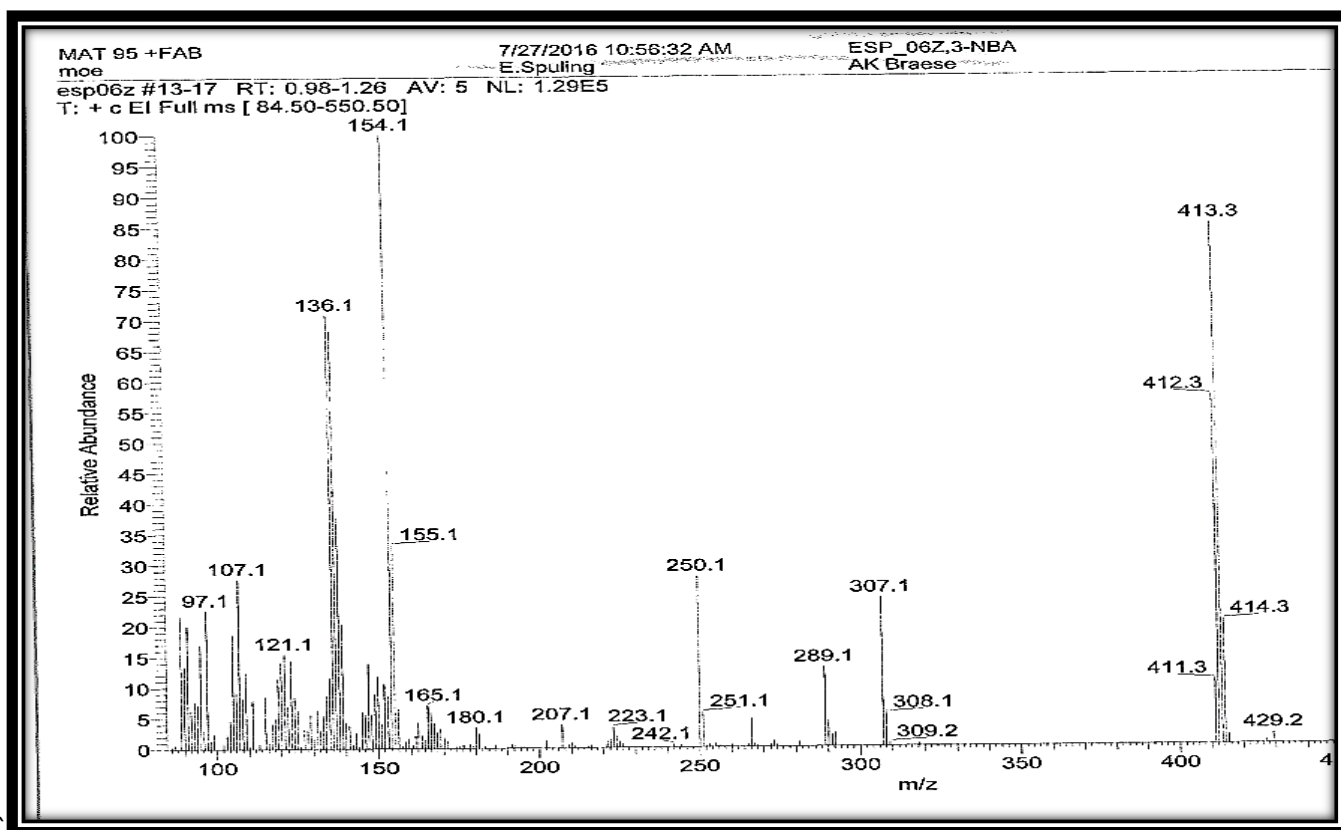

Figure 21. Mass spectrum of compound 8b

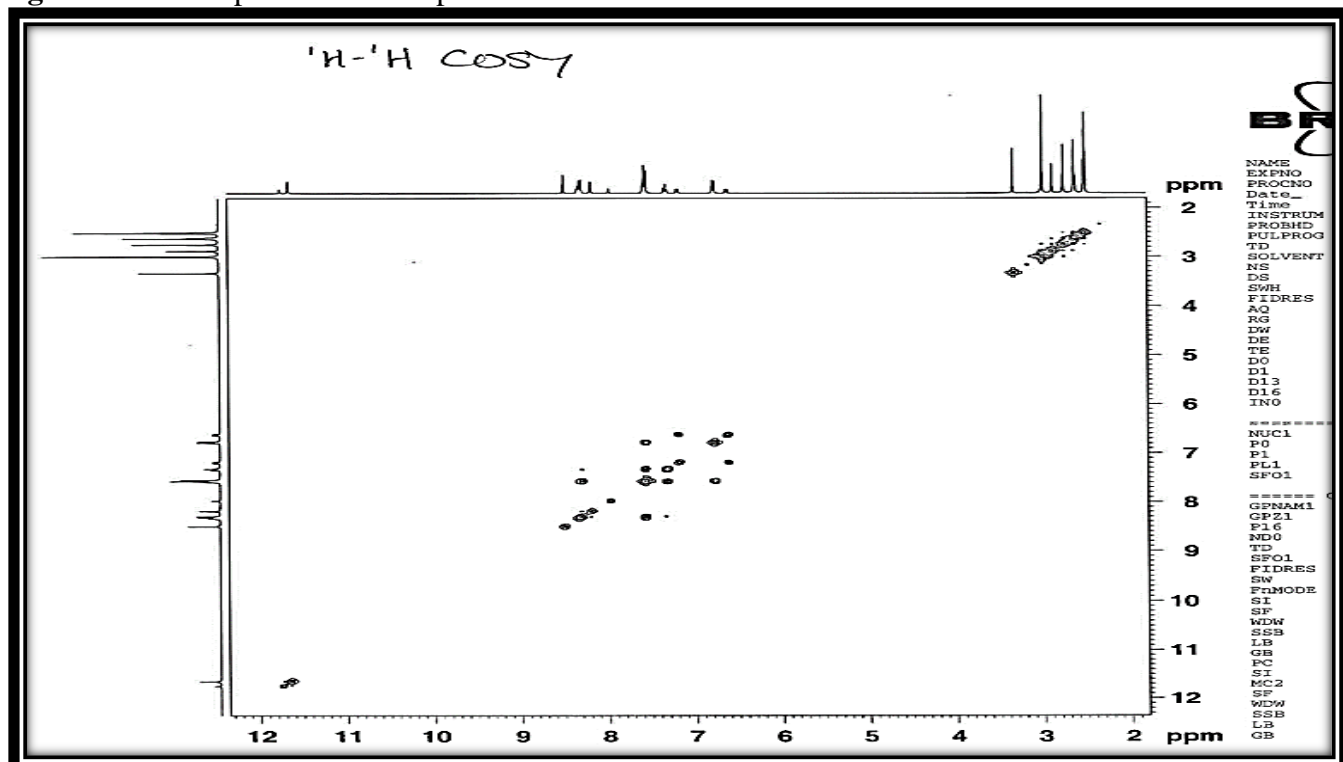

Figure 22. <sup>1</sup>H-<sup>1</sup>H COSY spectrum of compound 8b

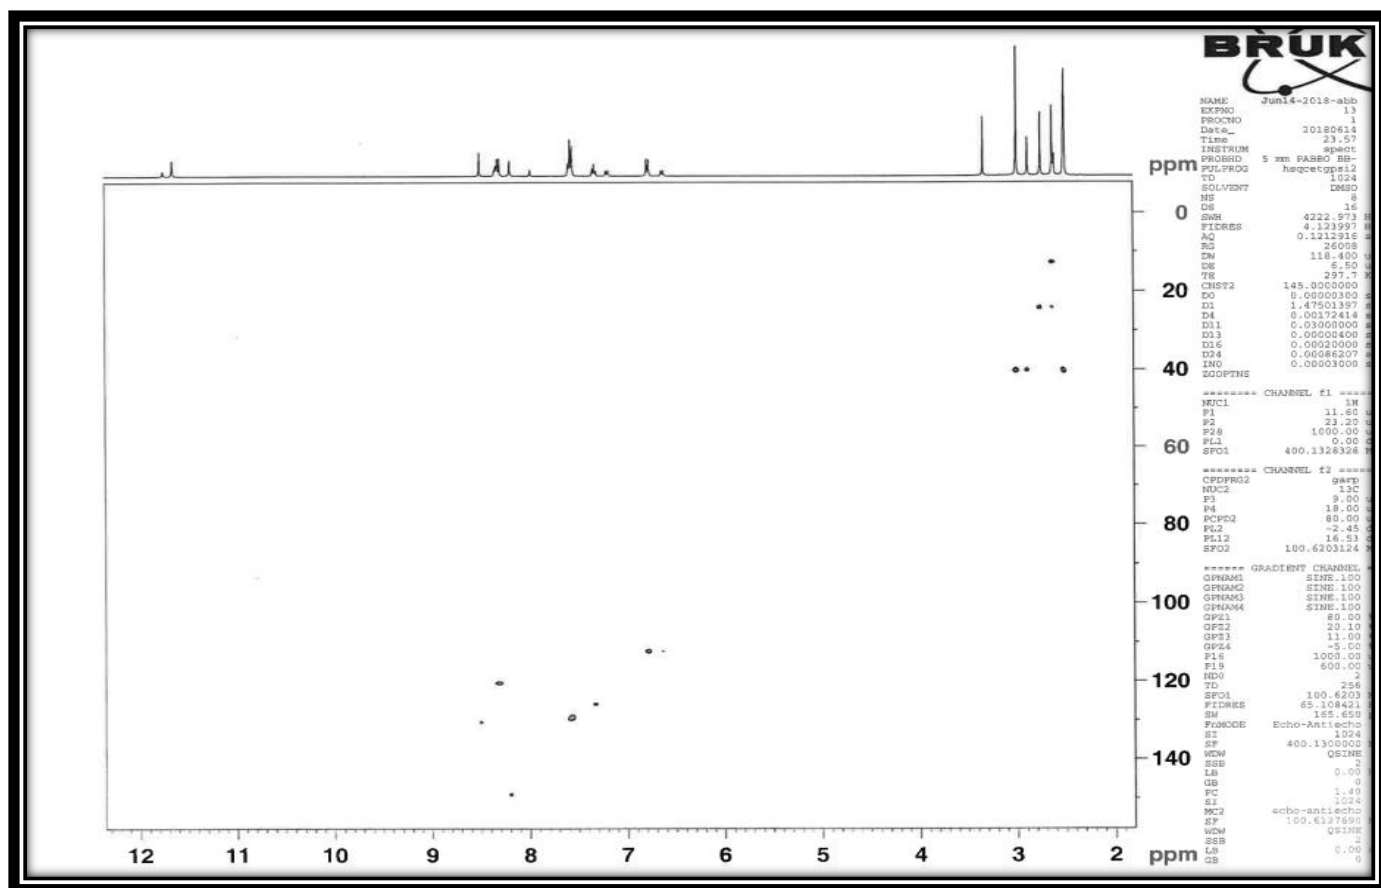

Figure 23.  $^1\text{H}$ - $^{13}\text{C}$  HSQC spectrum of compound 8b

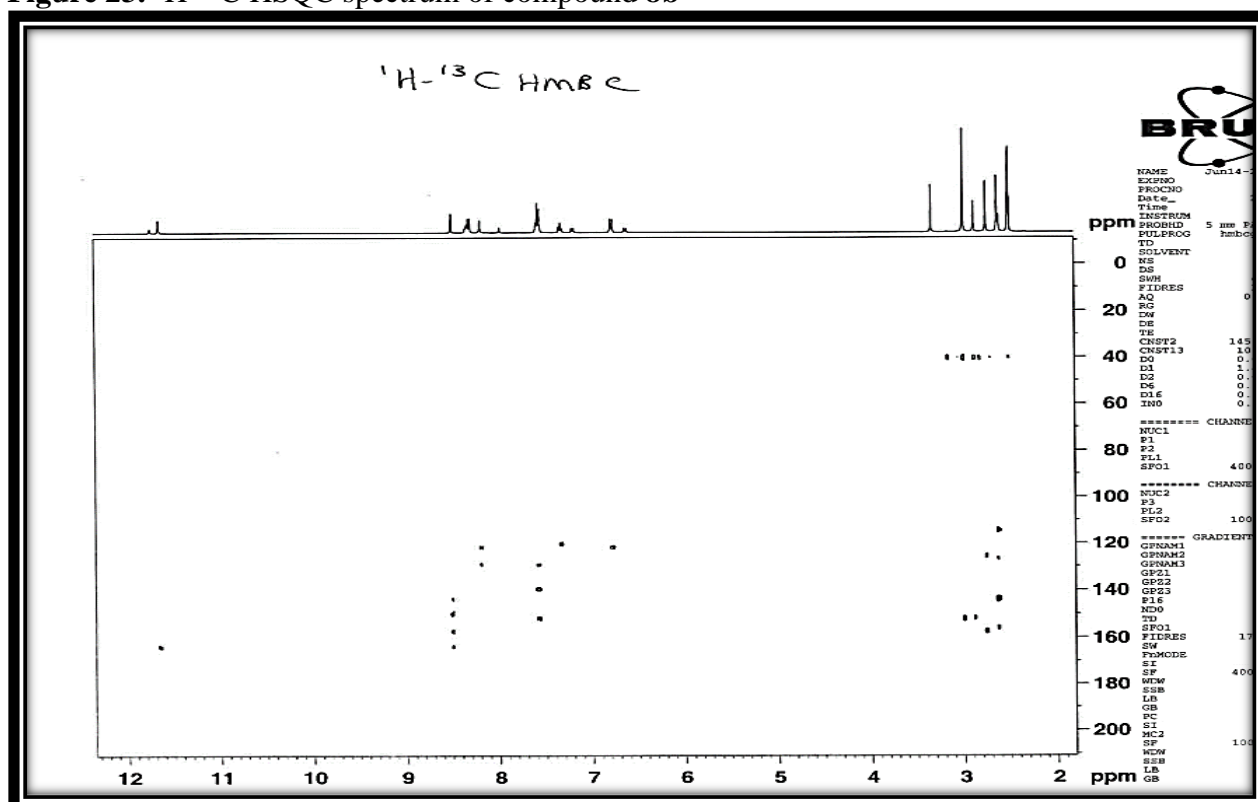

Figure 24.  $^1\text{H}$ - $^{13}\text{C}$  HMBC spectrum of compound 8b

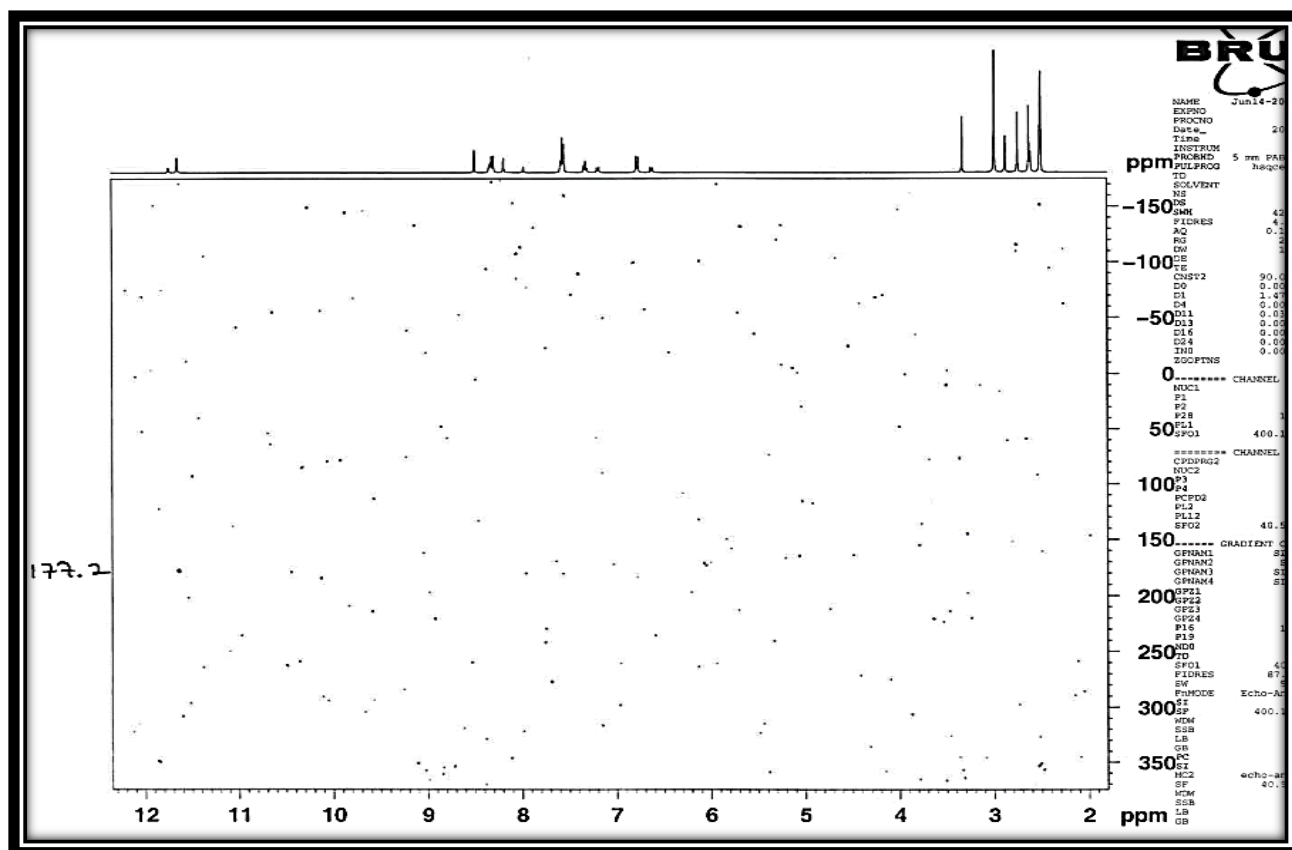

Figure 25.  $^1\text{H}$ - $^{15}\text{N}$  HSQC spectrum of compound **8b**

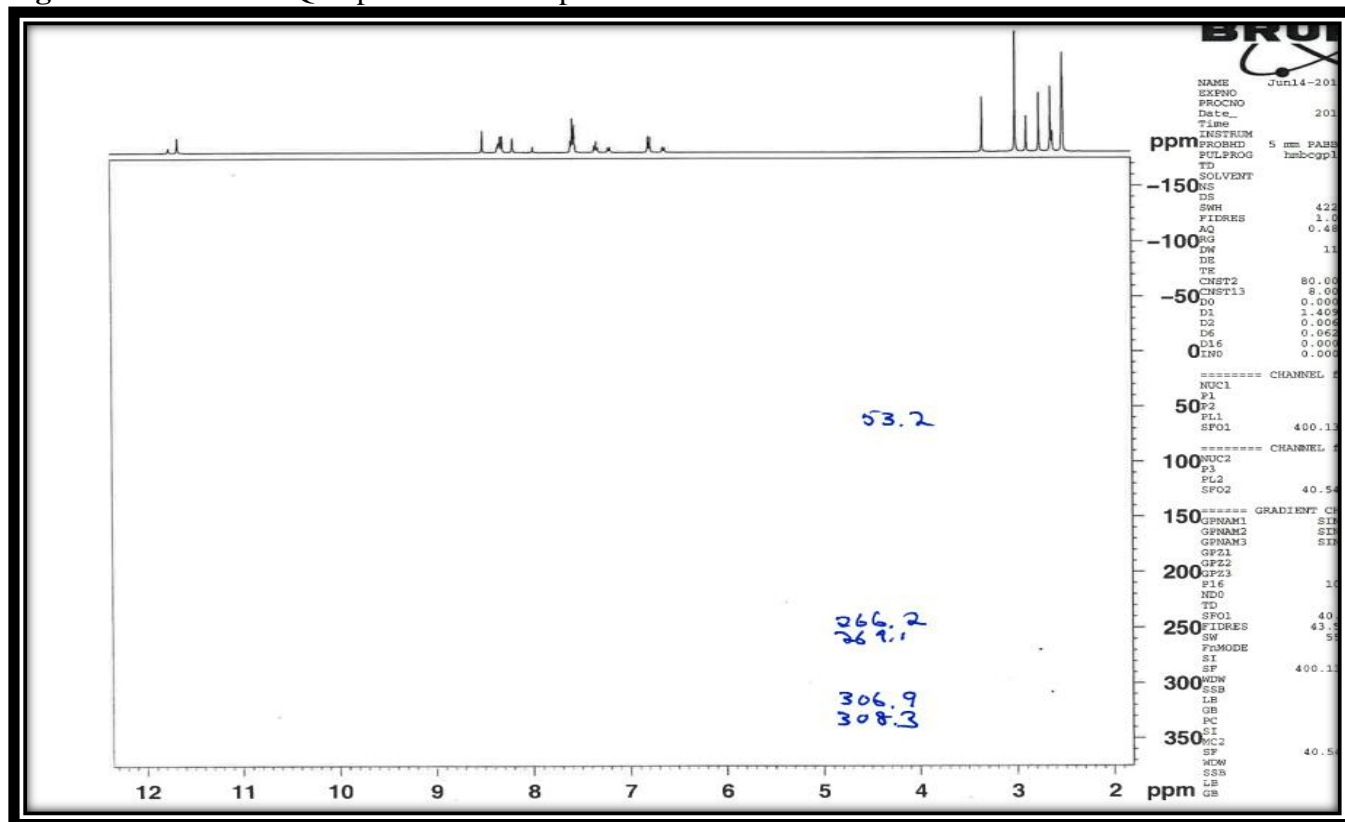

Figure 26.  $^1\text{H}$ - $^{15}\text{N}$  HMBC spectrum of compound **8b**

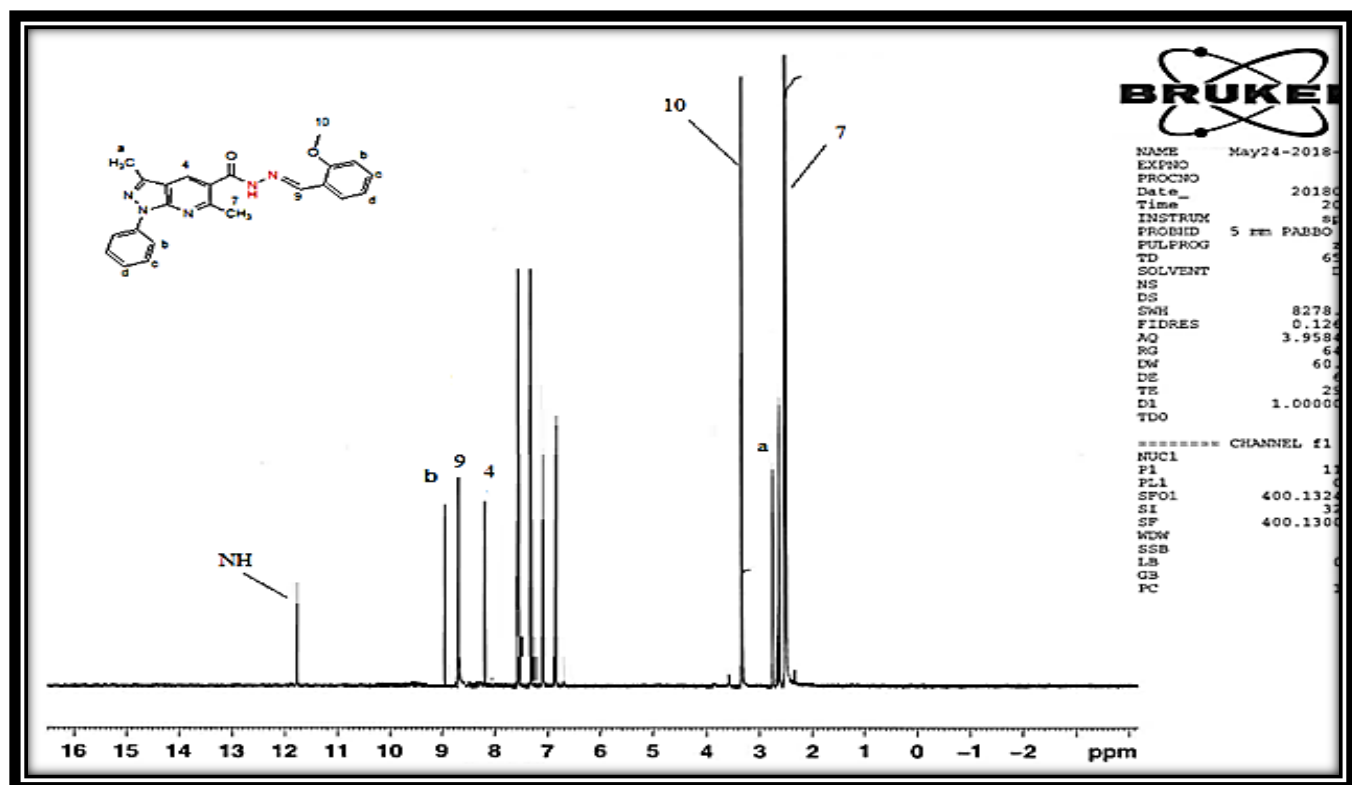

Figure 27. <sup>1</sup>H NMR spectrum of compound 8c

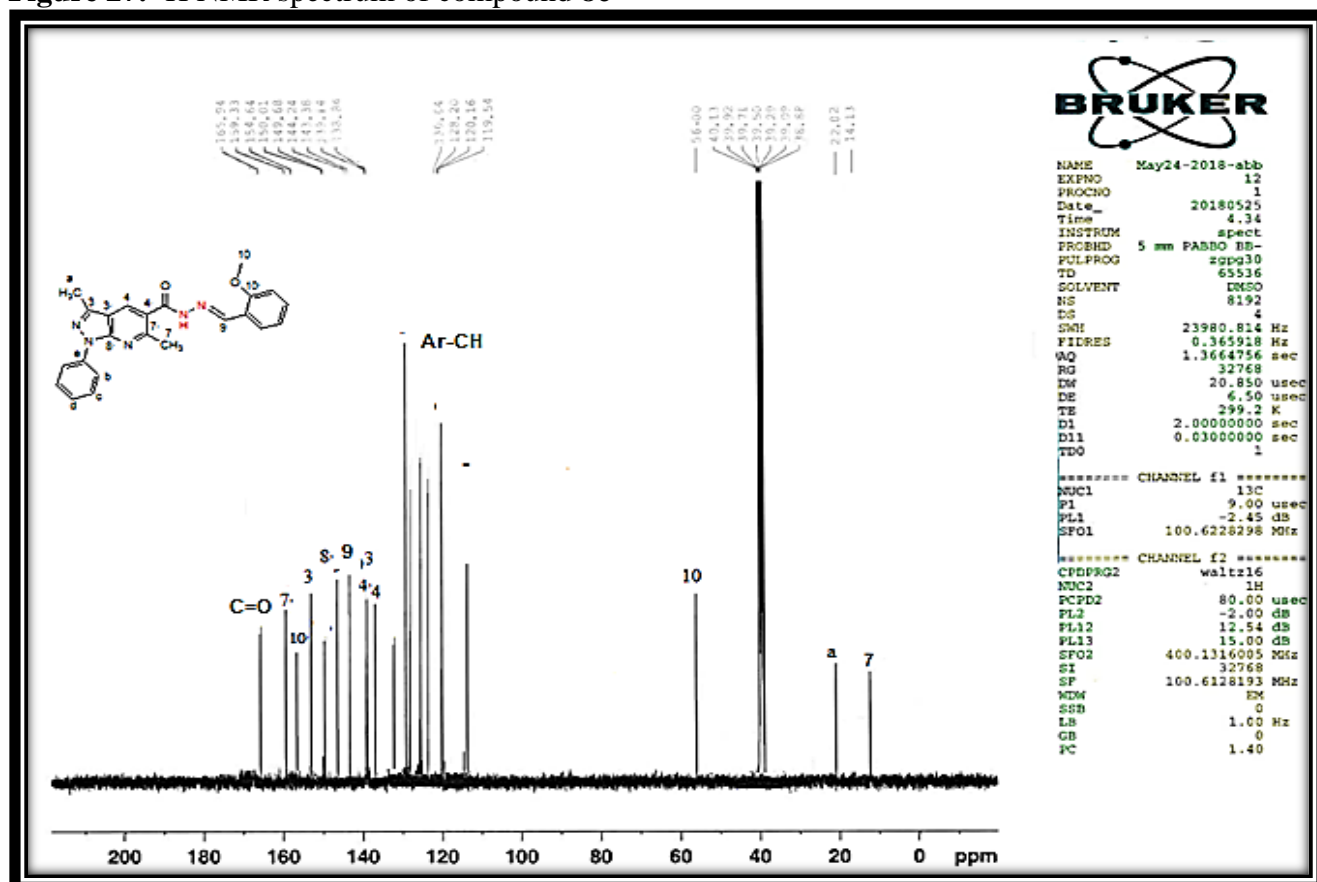

Figure 28. <sup>13</sup>C NMR spectrum of compound 8c

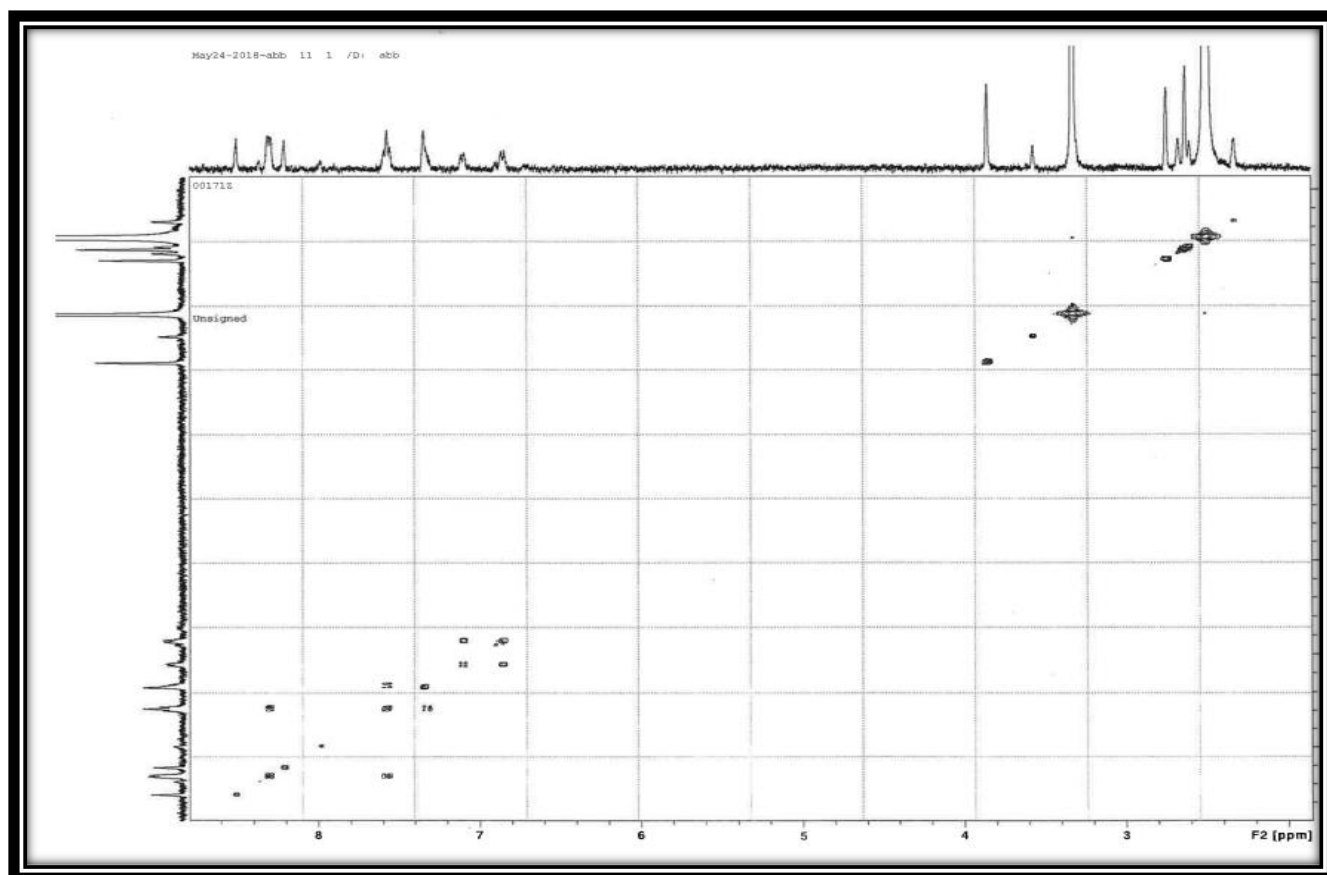

Figure 29.  $^1\text{H}$ - $^1\text{H}$  COSY spectrum of compound **8c**

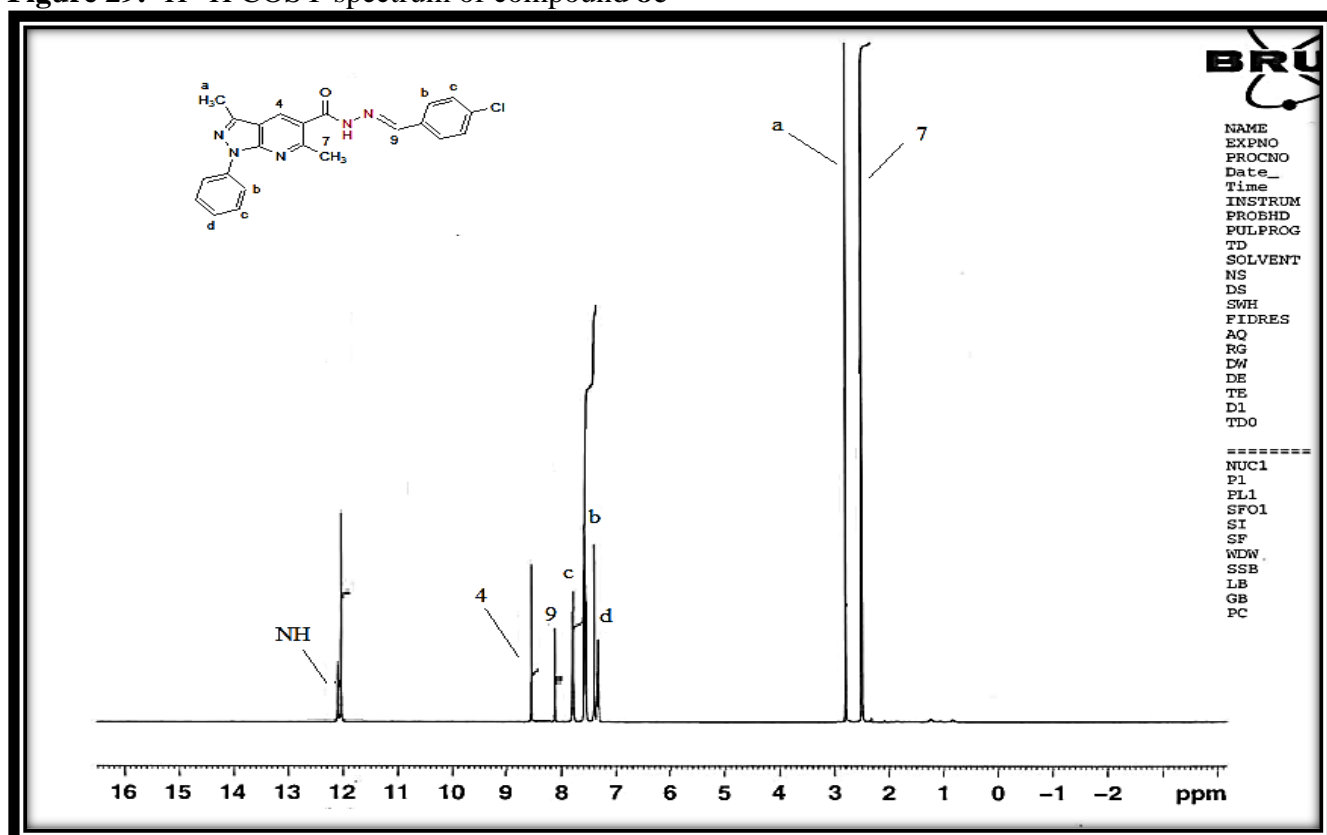

Figure 30.  $^1\text{H}$  NMR spectrum of compound **8d**



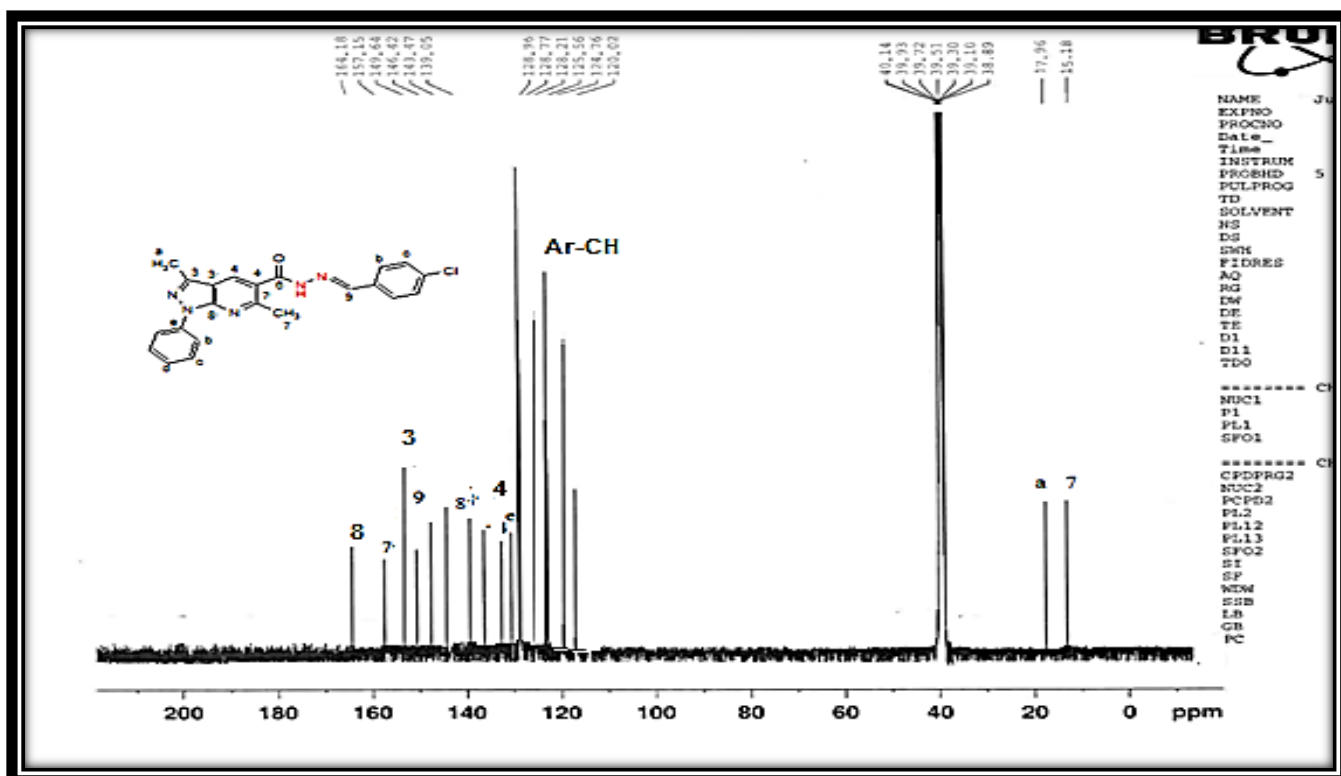

Figure 31.  $^{13}\text{C}$  NMR spectrum of compound 8d

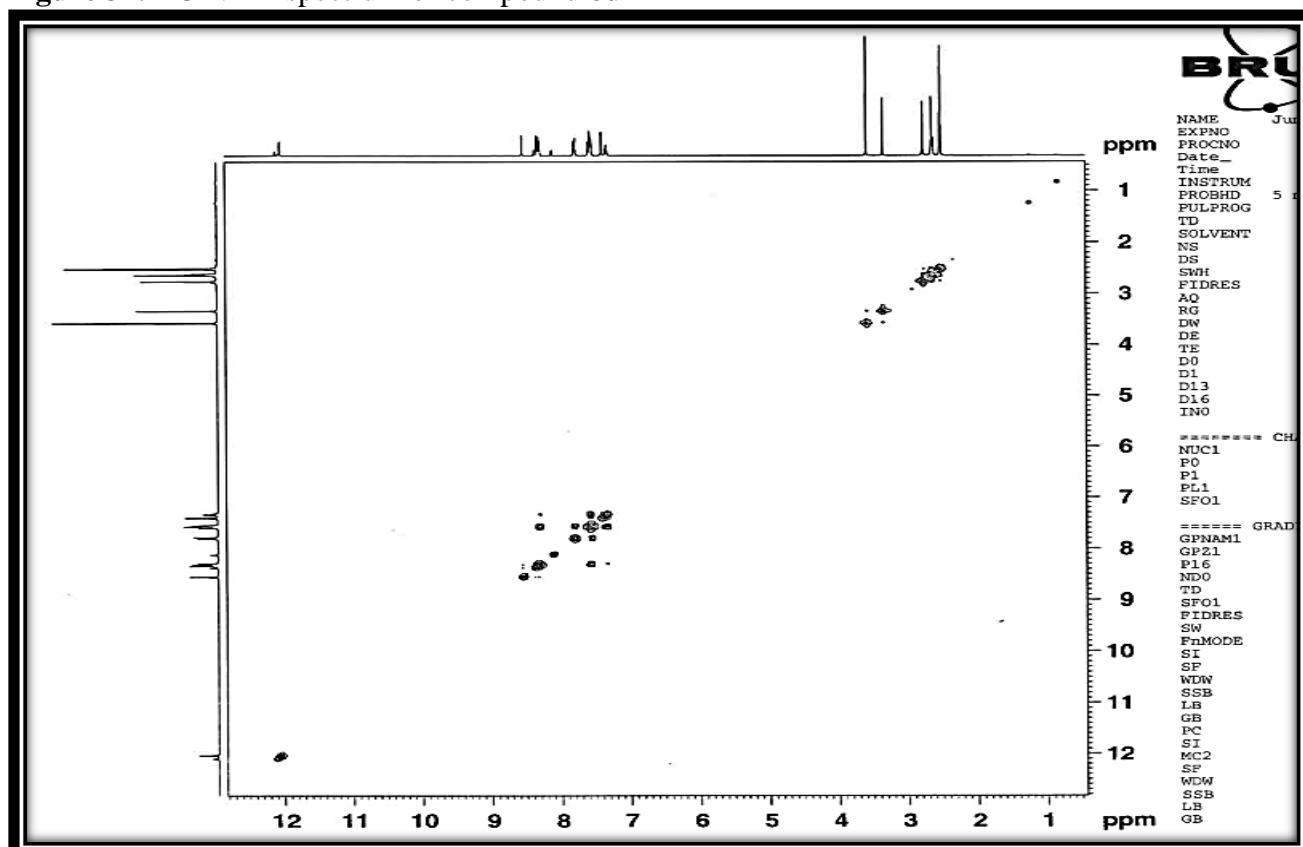

Figure 32.  $^1\text{H}$ - $^1\text{H}$  COSY spectrum of compound 8d

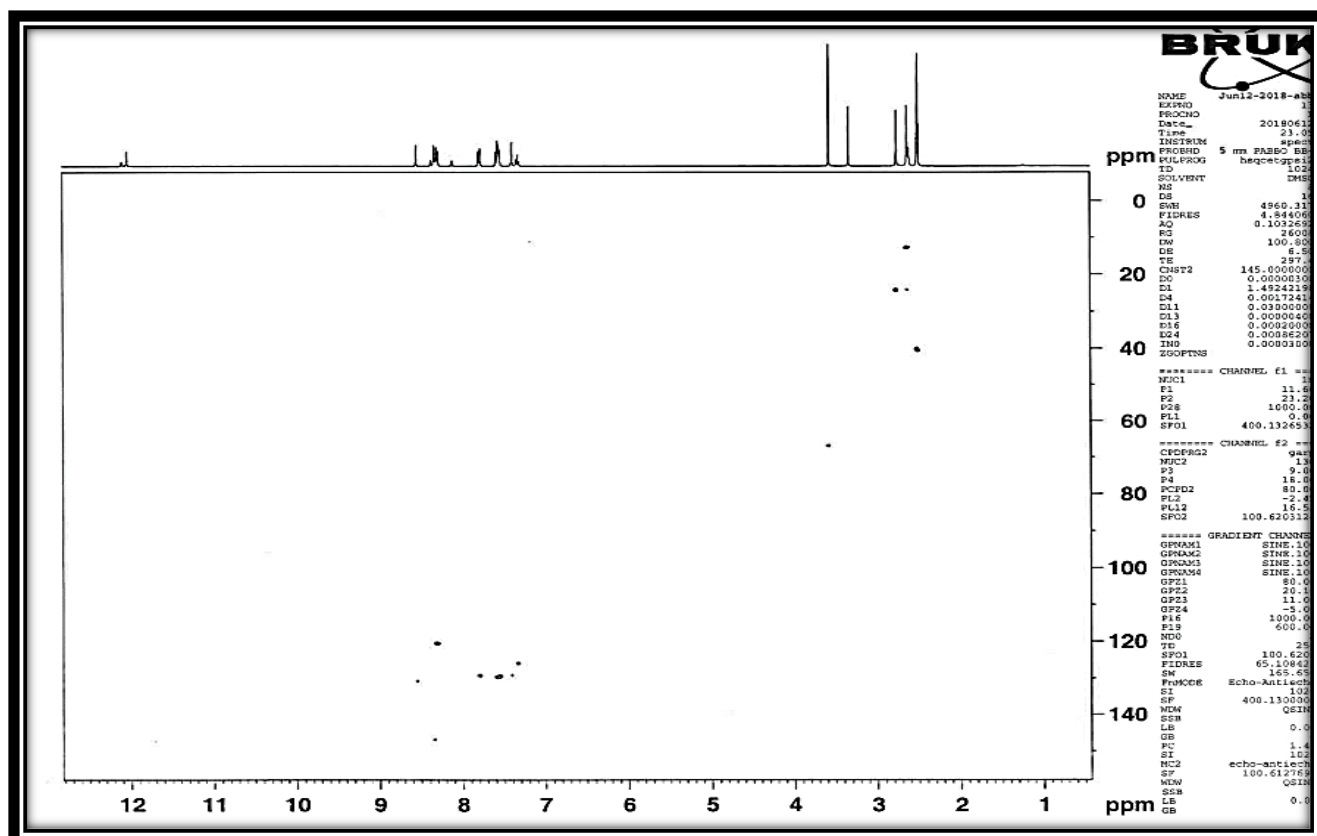

Figure 33.  $^1\text{H}$ - $^{13}\text{C}$  HSQC spectrum of compound **8d**

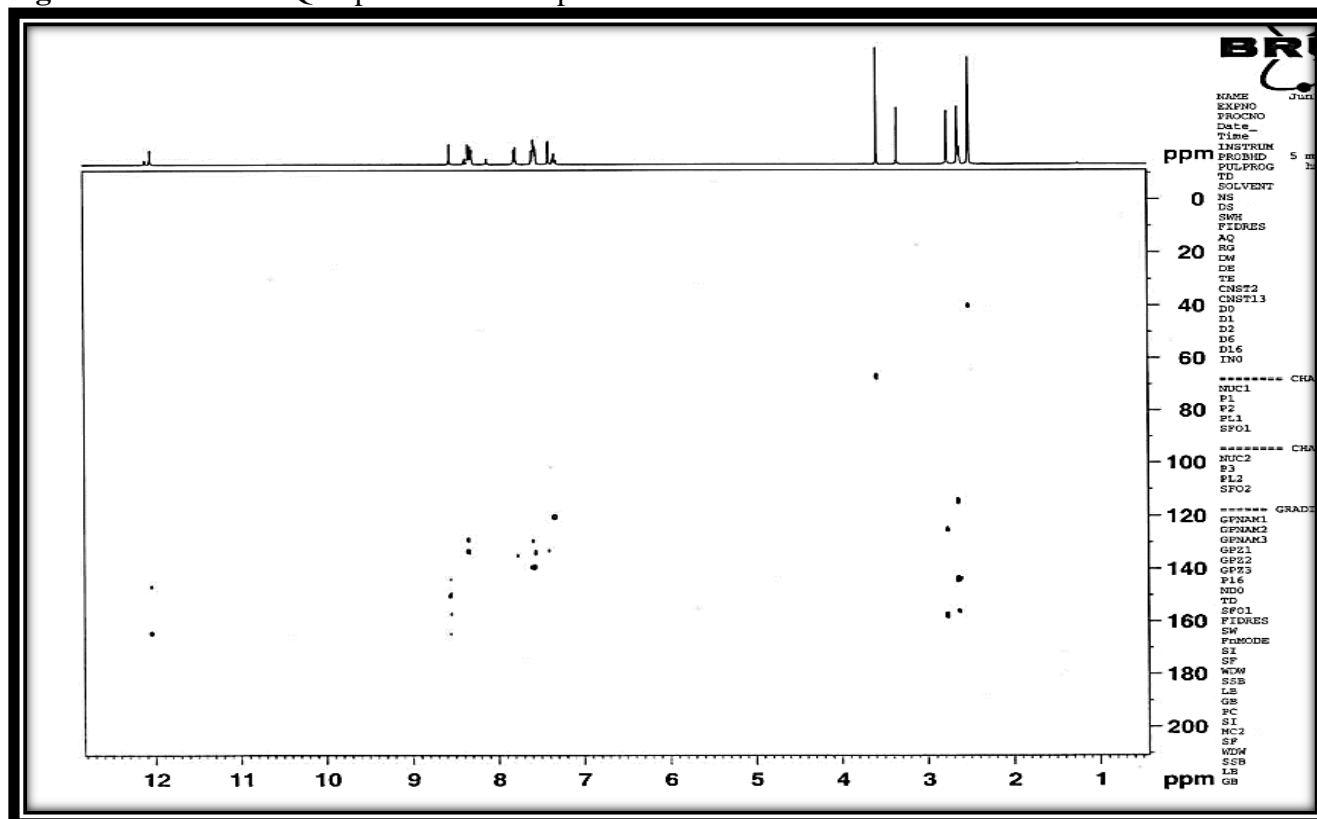

Figure 34.  $^1\text{H}$ - $^{13}\text{C}$  HMBC spectrum of compound **8d**

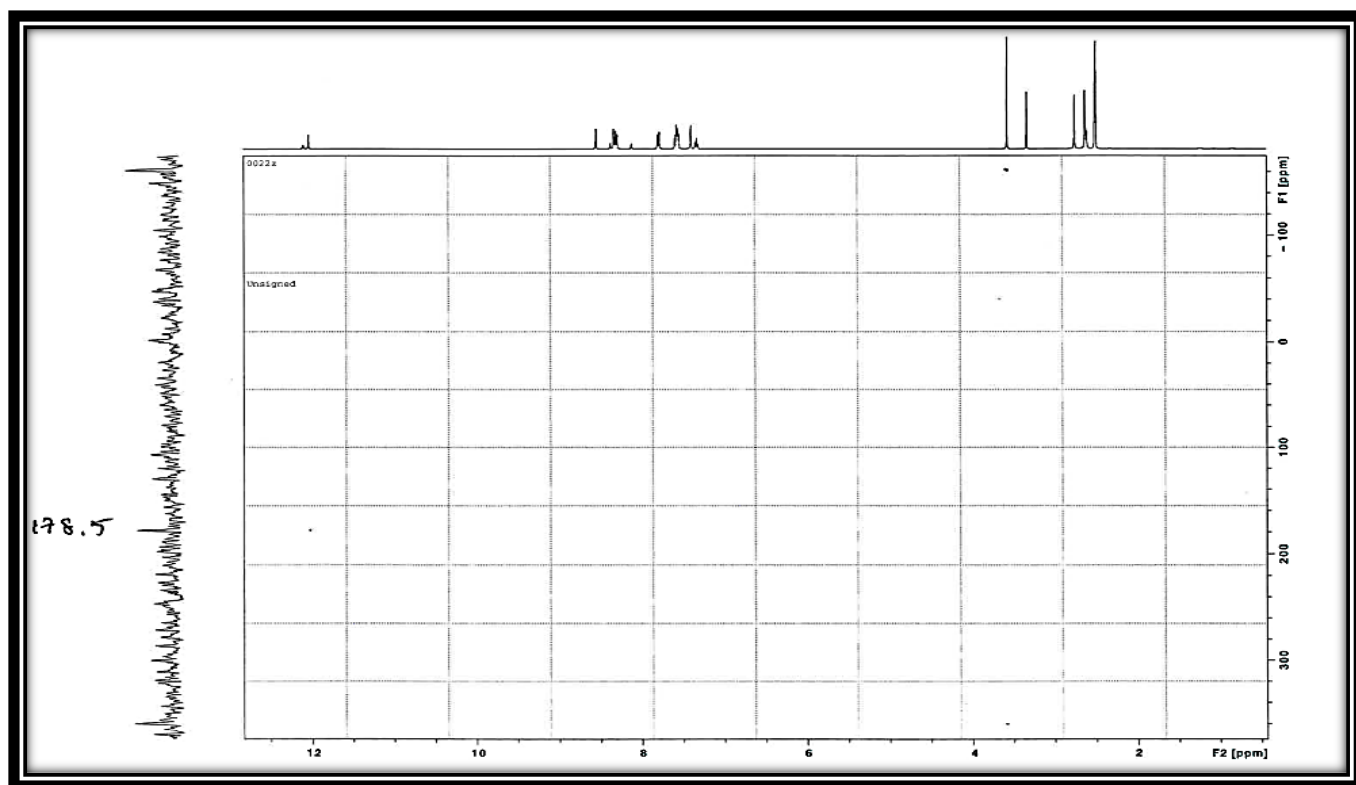

Figure 35.  $^1\text{N}$ - $^{15}\text{N}$  HSQC spectrum of compound **8d**

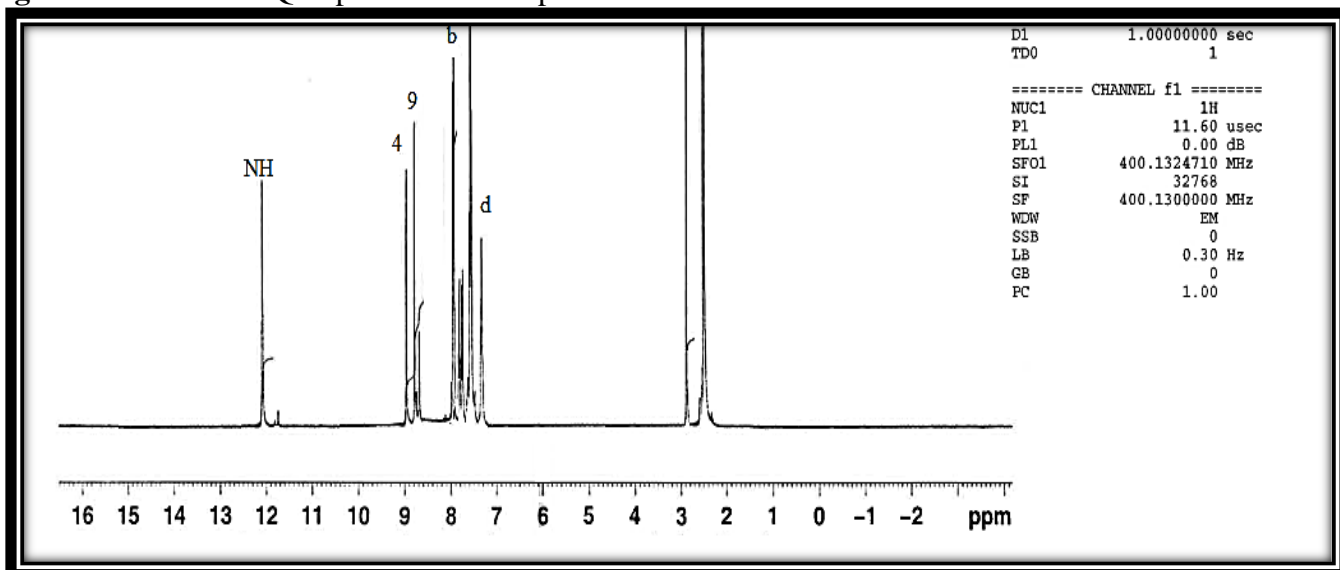

Figure 36.  $^1\text{H}$  NMR spectrum of compound **8e**

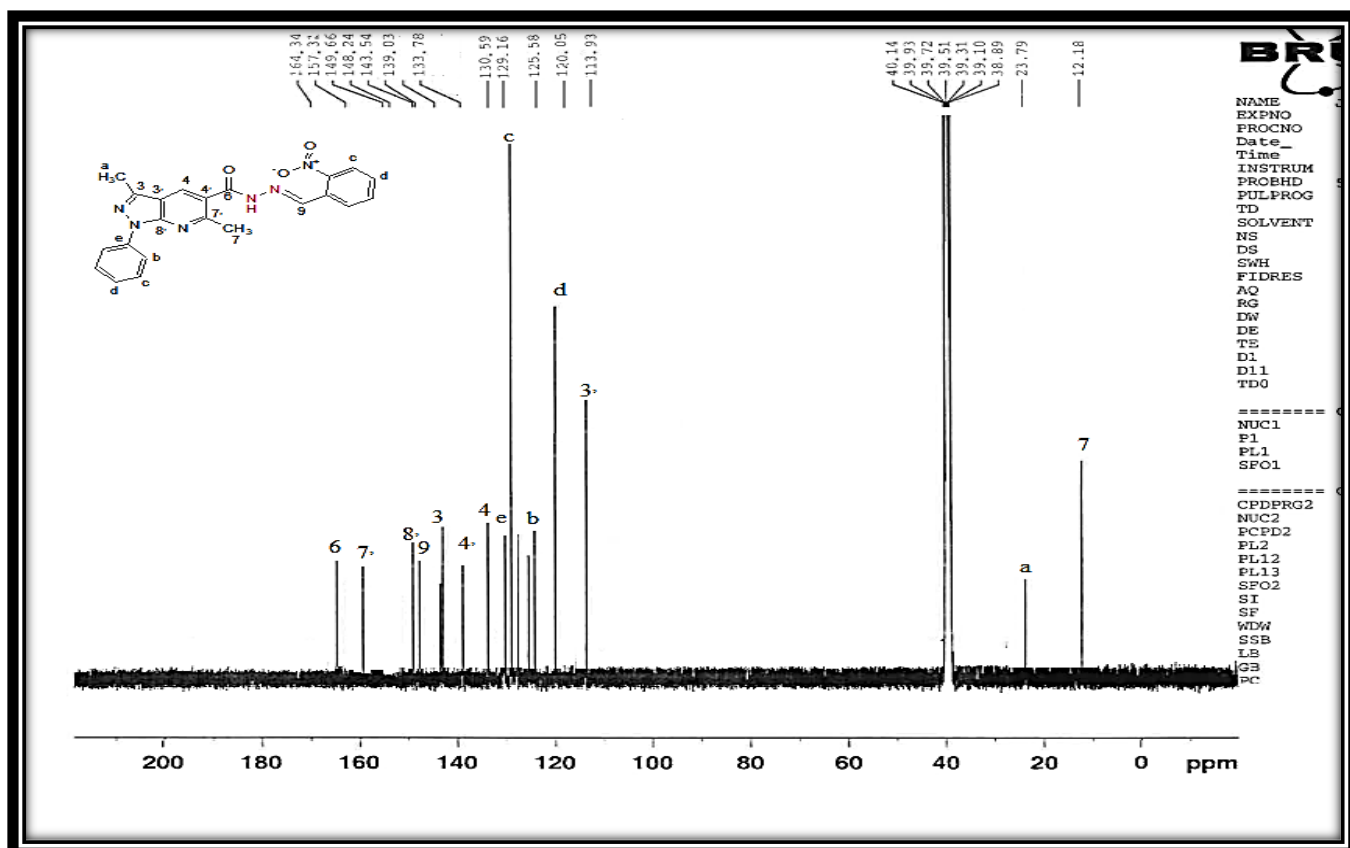

Figure 37.  $^{13}\text{C}$  NMR spectrum of compound **8e**

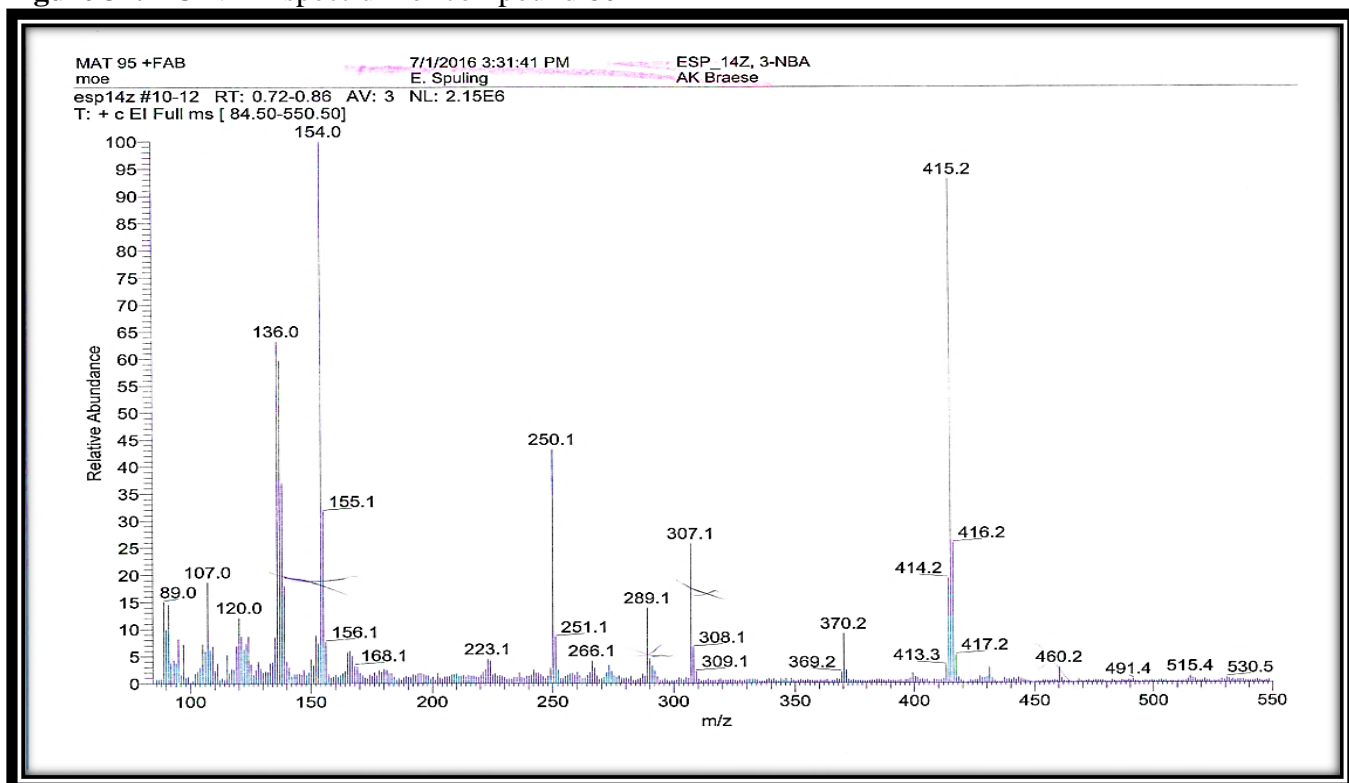

Figure 38. Mass spectrum of compound **8e**

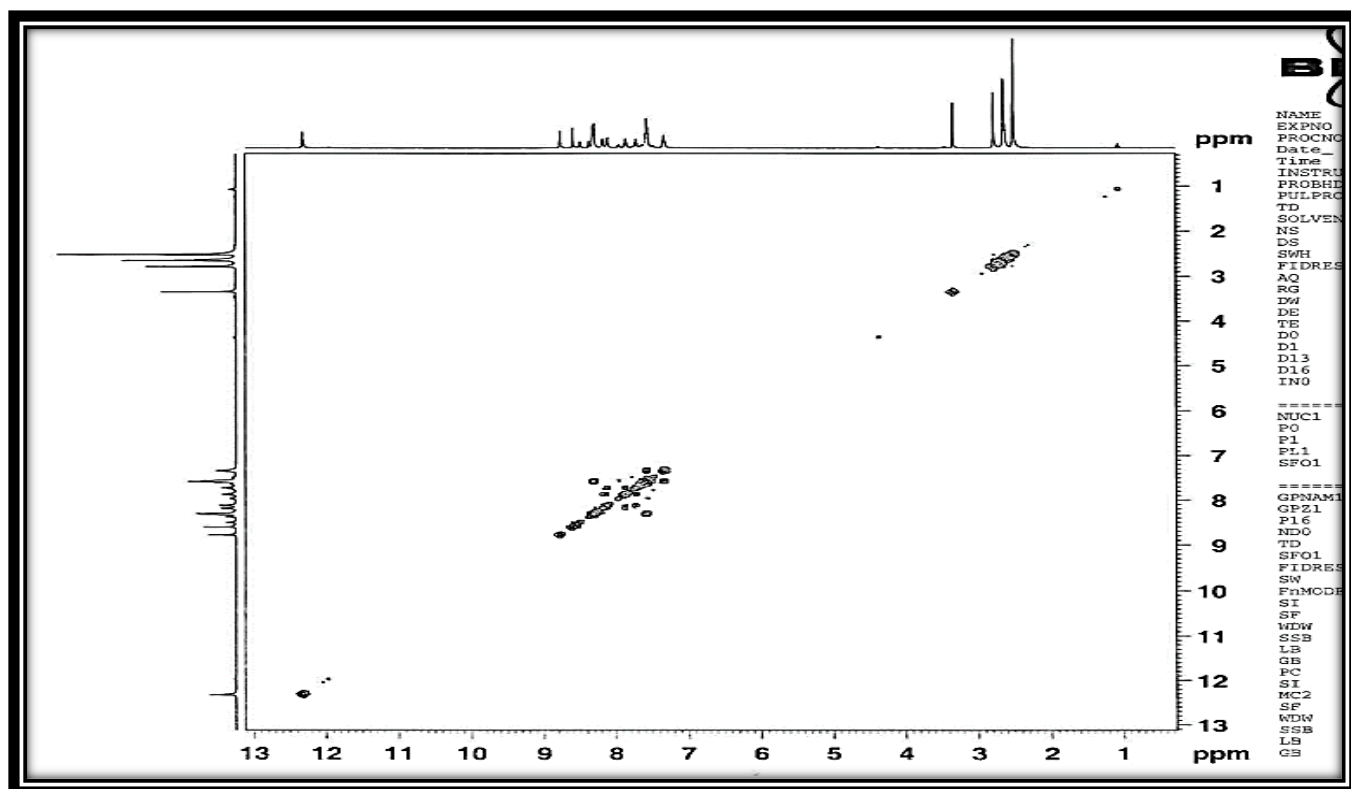

Figure 39.  $^1\text{H}$ - $^1\text{H}$  COSY spectrum of compound **8e**

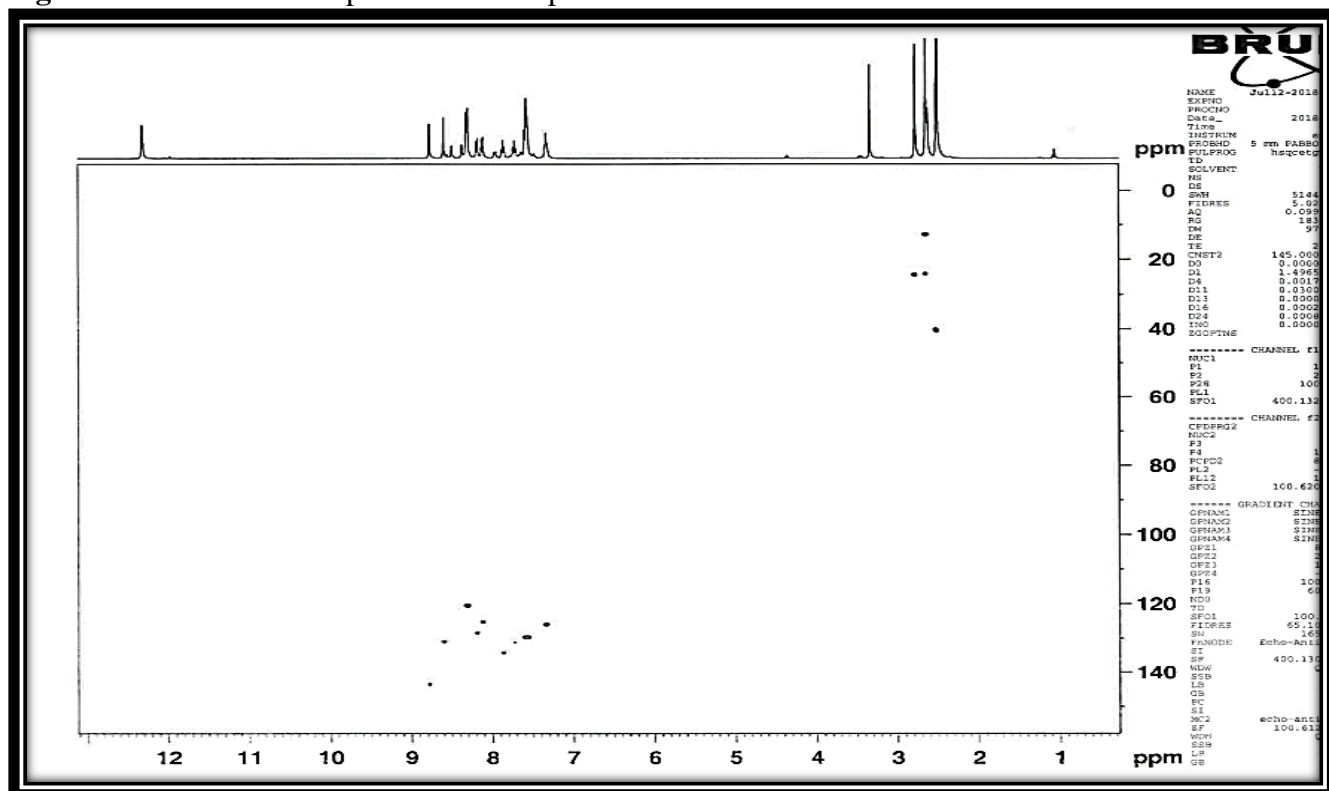

Figure 40.  $^1\text{H}$ - $^{13}\text{C}$  HSQC spectrum of compound **8e**

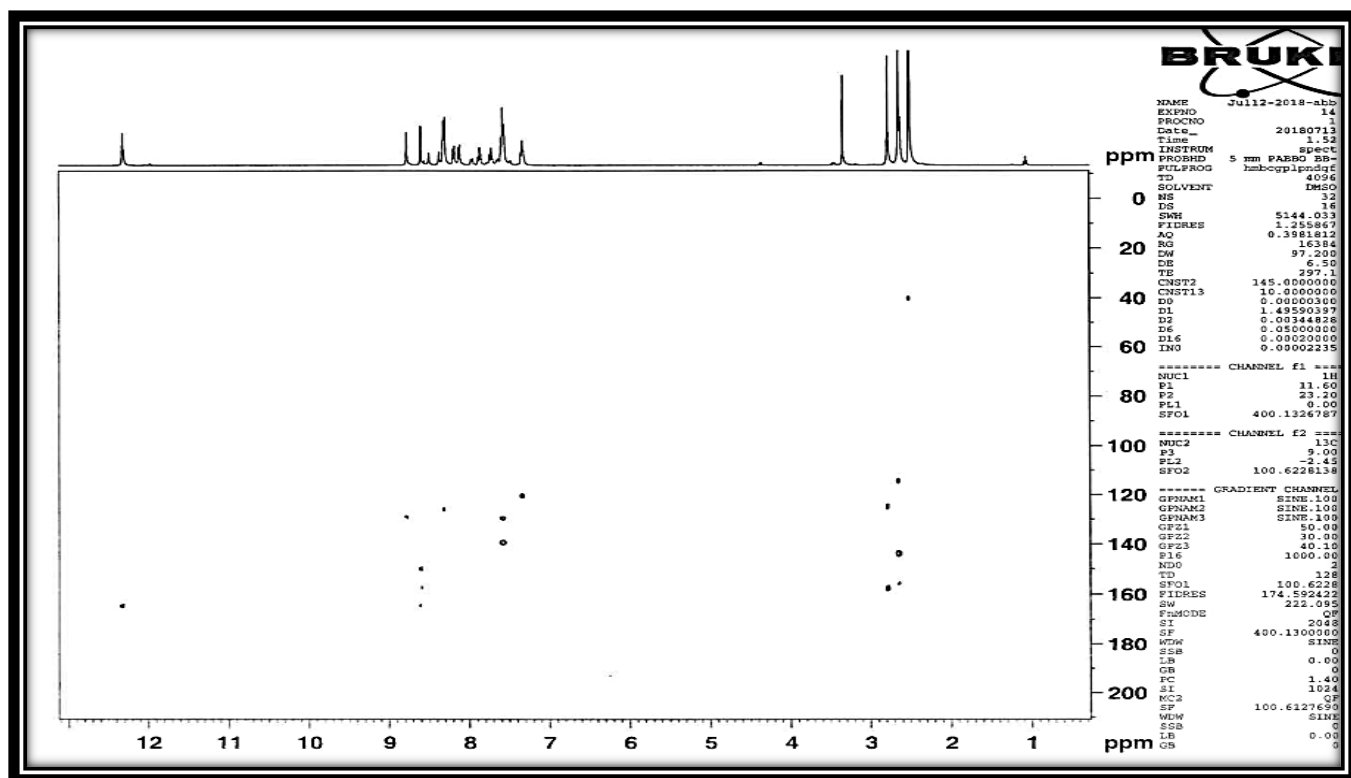

Figure 41.  $^1\text{H}$ - $^{13}\text{C}$  HMBC spectrum of compound **8e**

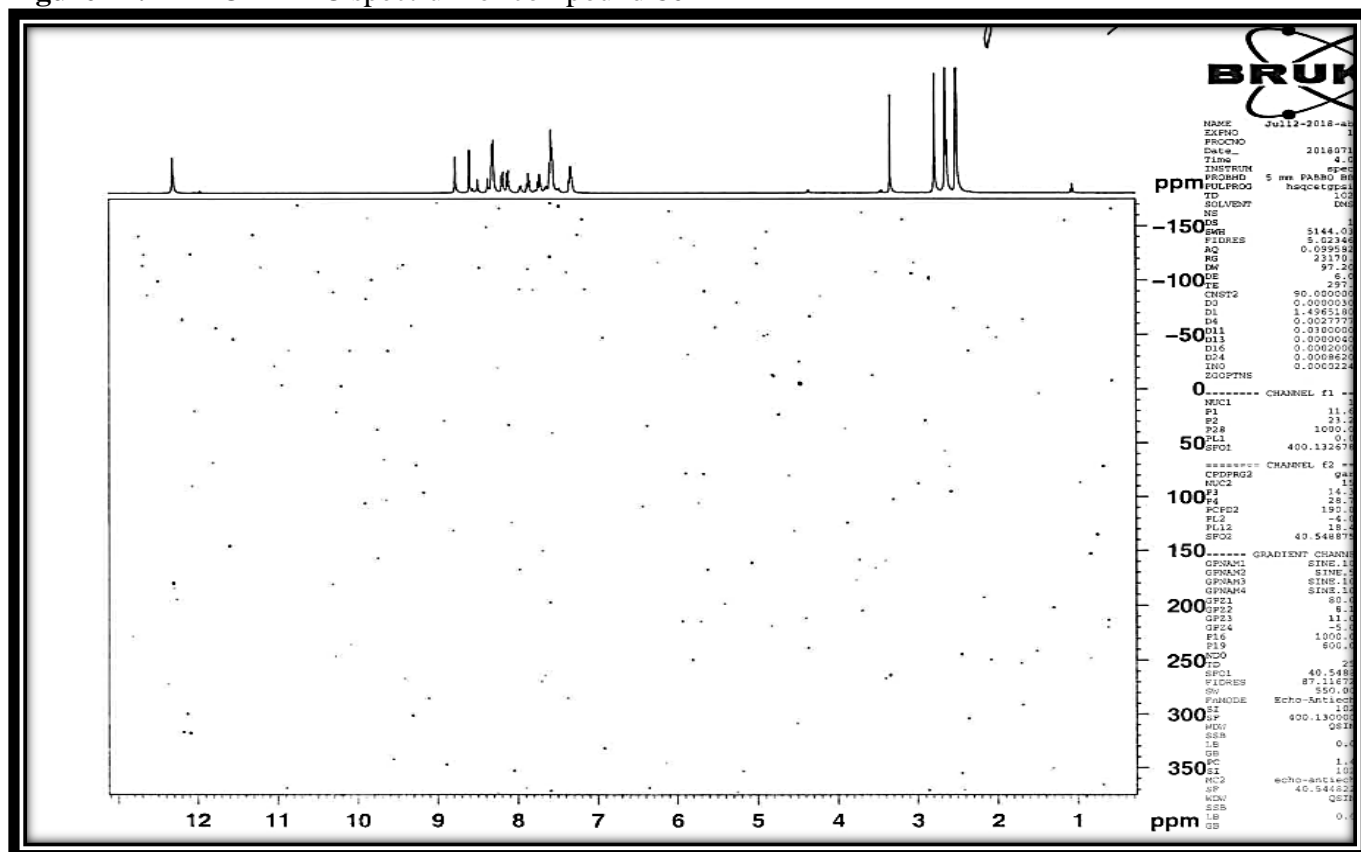

Figure 42.  $^1\text{H}$ - $^{15}\text{N}$  HSQC spectrum of compound **8e**

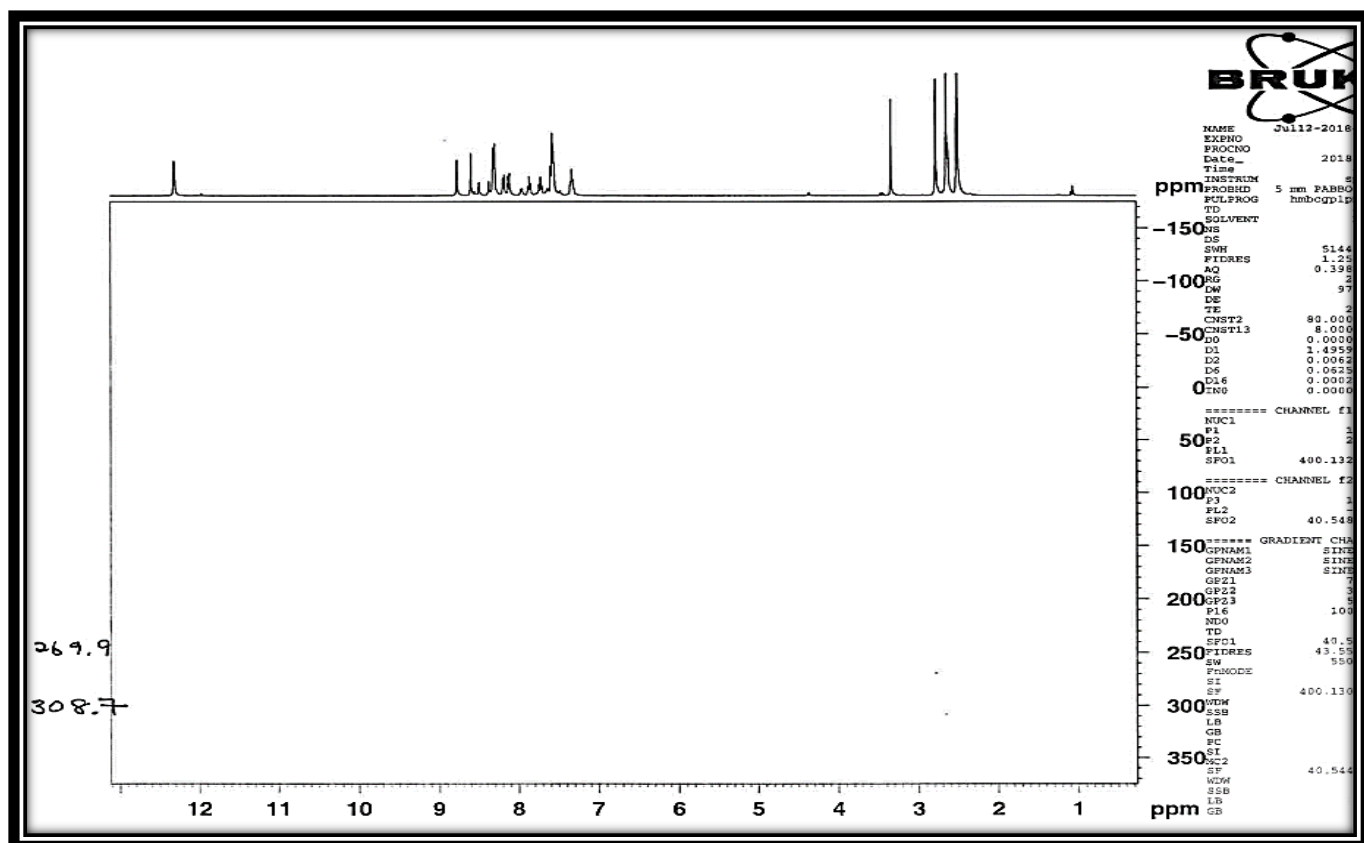

Figure 43.  $^1\text{H}$ - $^{15}\text{N}$  HMBC spectrum of compound 8e

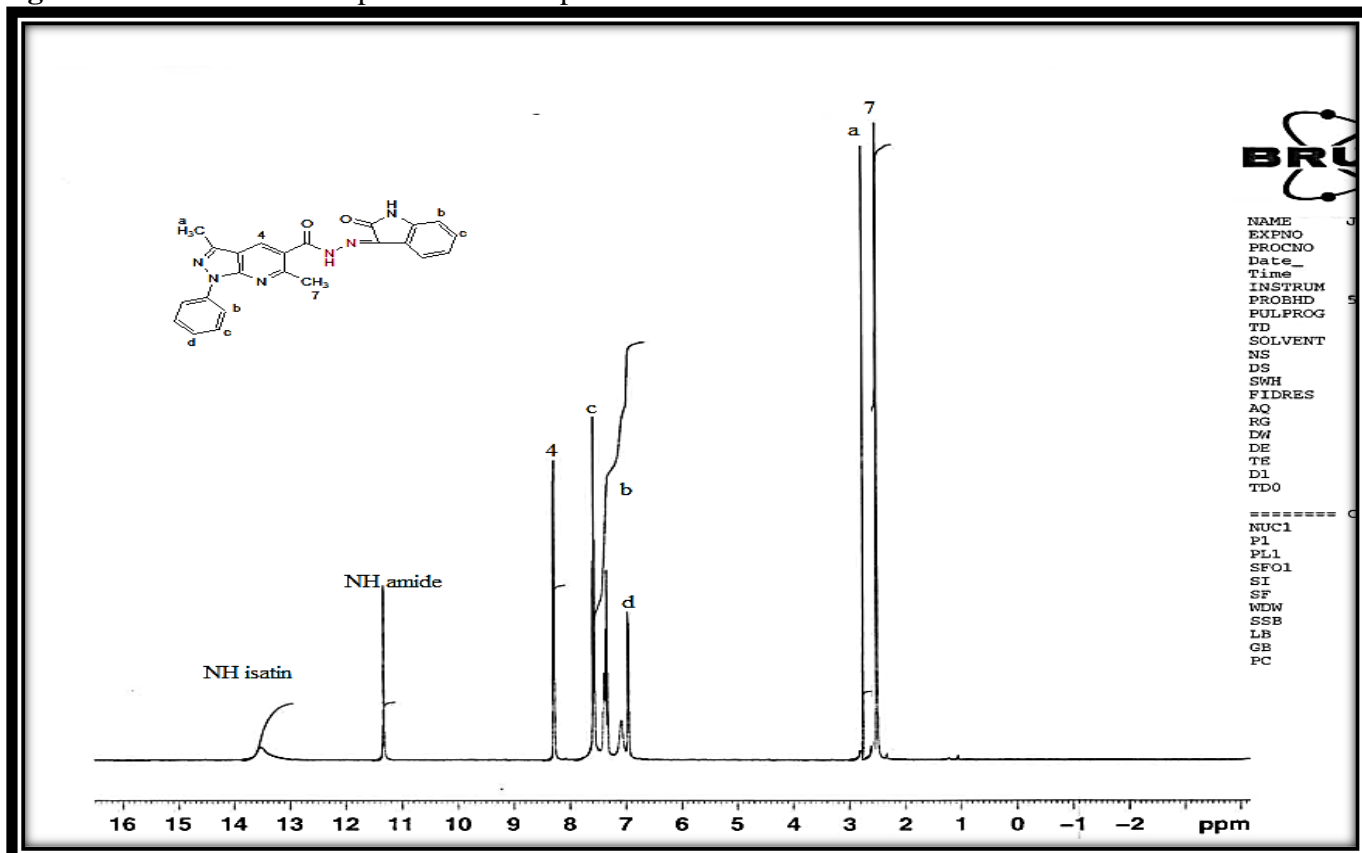

Figure 44.  $^1\text{H}$  NMR spectrum of compound 8f



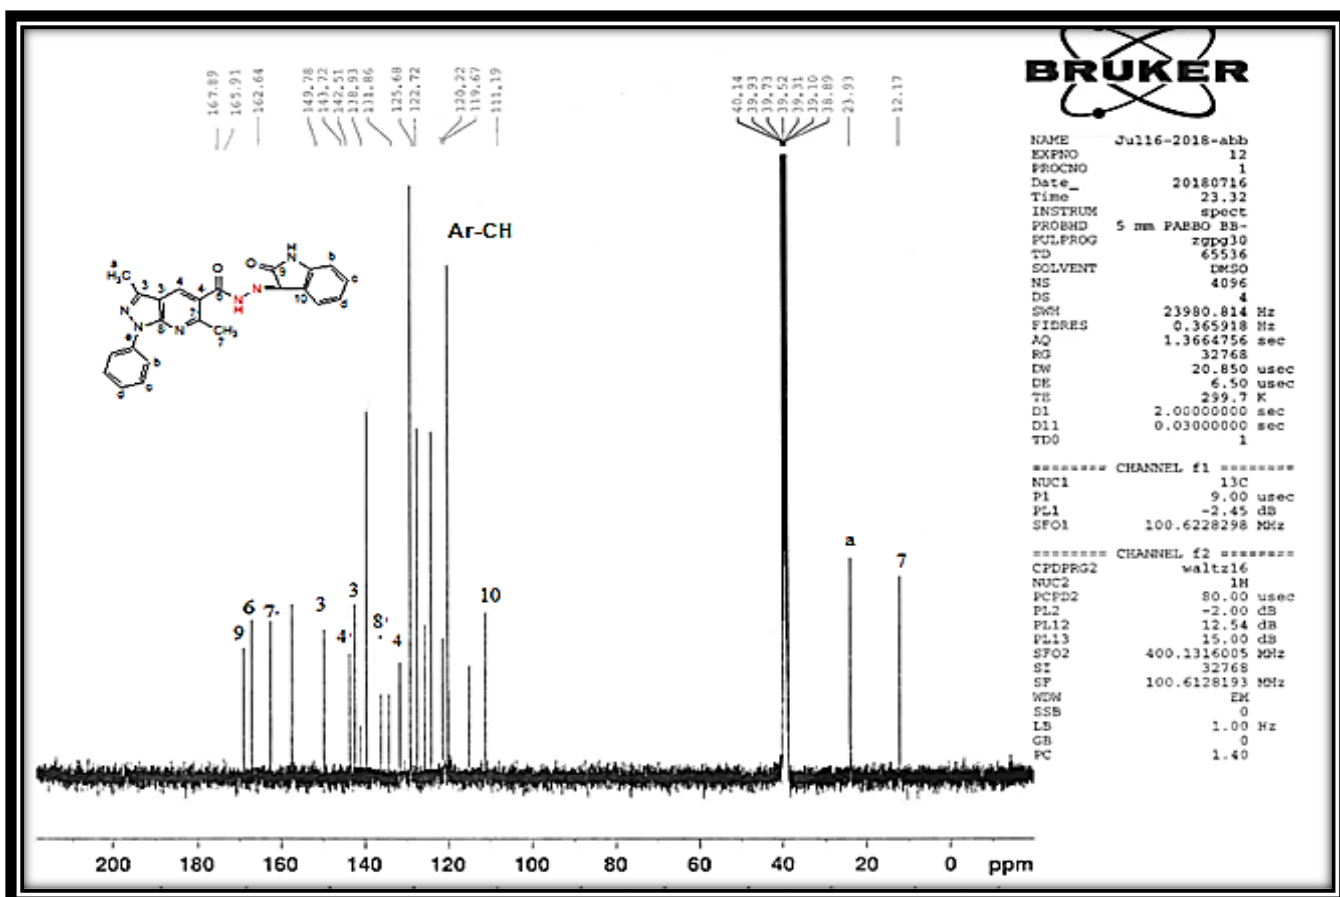

Figure 45.  $^{13}\text{C}$  NMR spectrum of compound **8f**

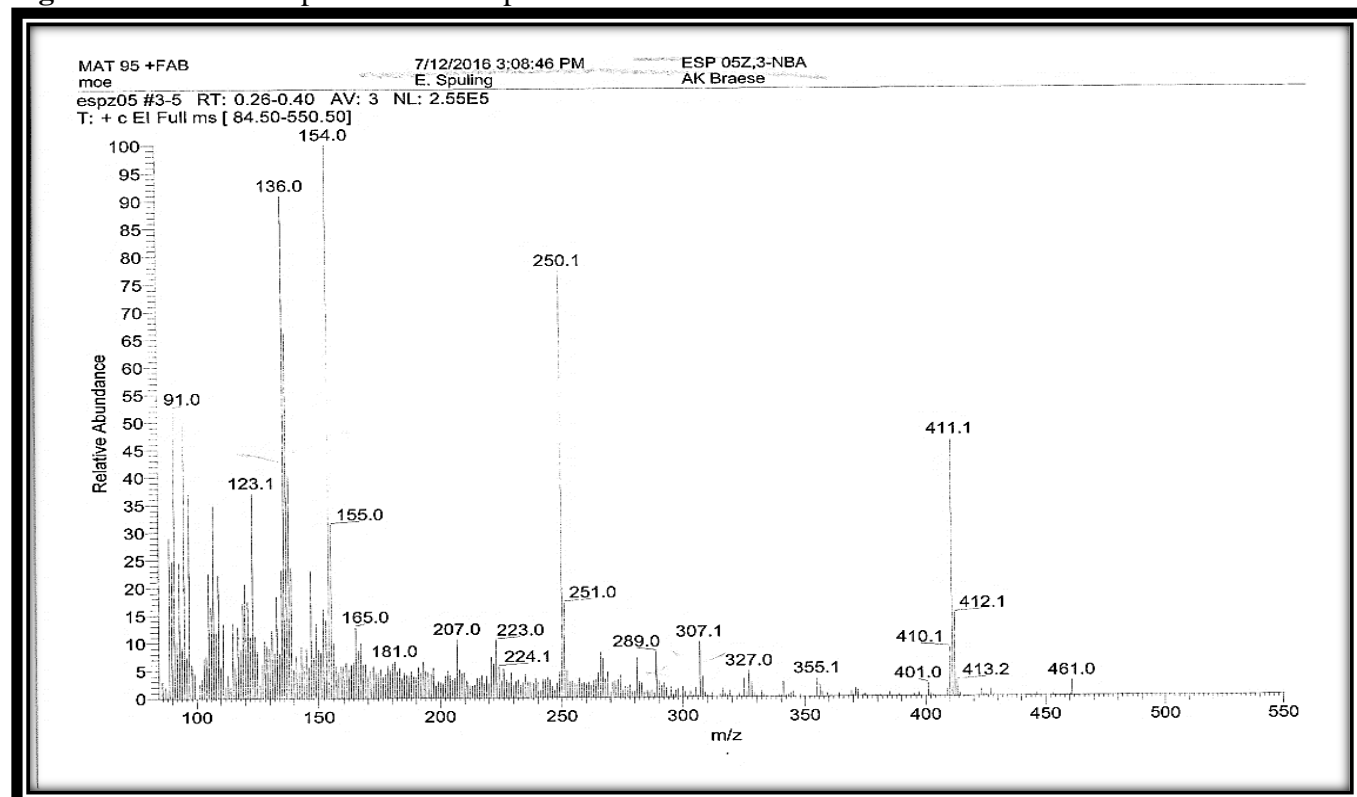

Figure 46. Mass spectrum of compound **8f**

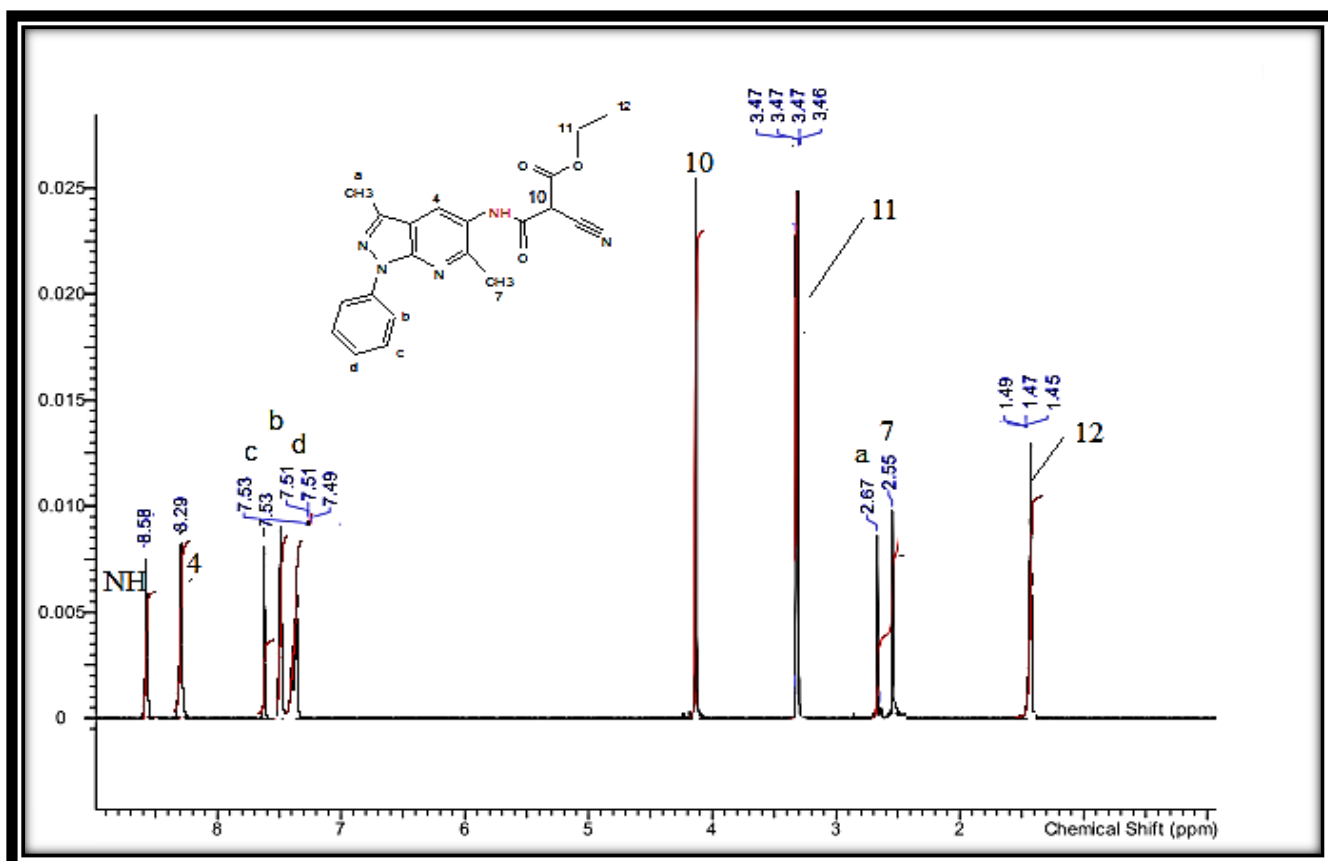

Figure 47.  $^1\text{H}$  NMR spectrum of compound 11

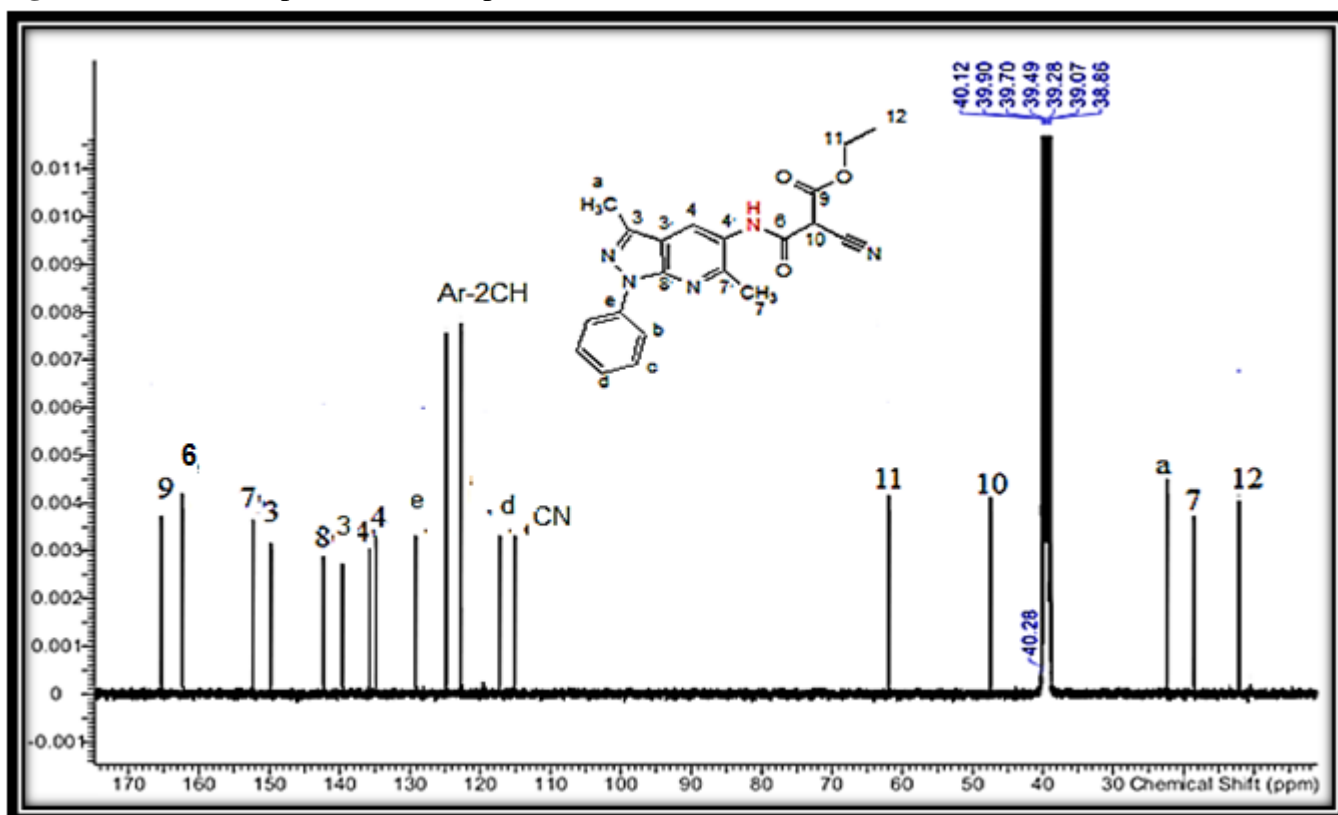

Figure 48.  $^{13}\text{C}$  NMR spectrum of compound 11

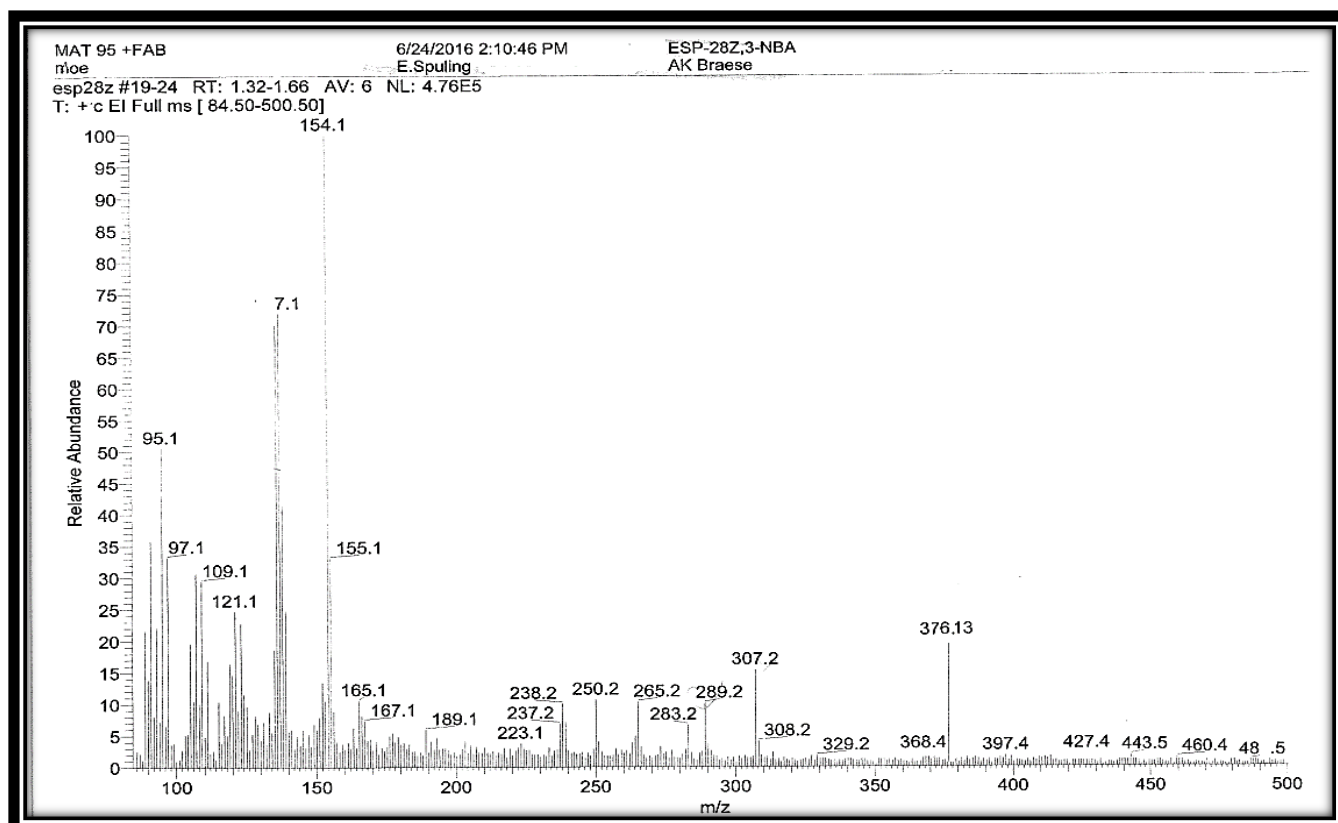

Figure 49. MS spectrum of compound 11

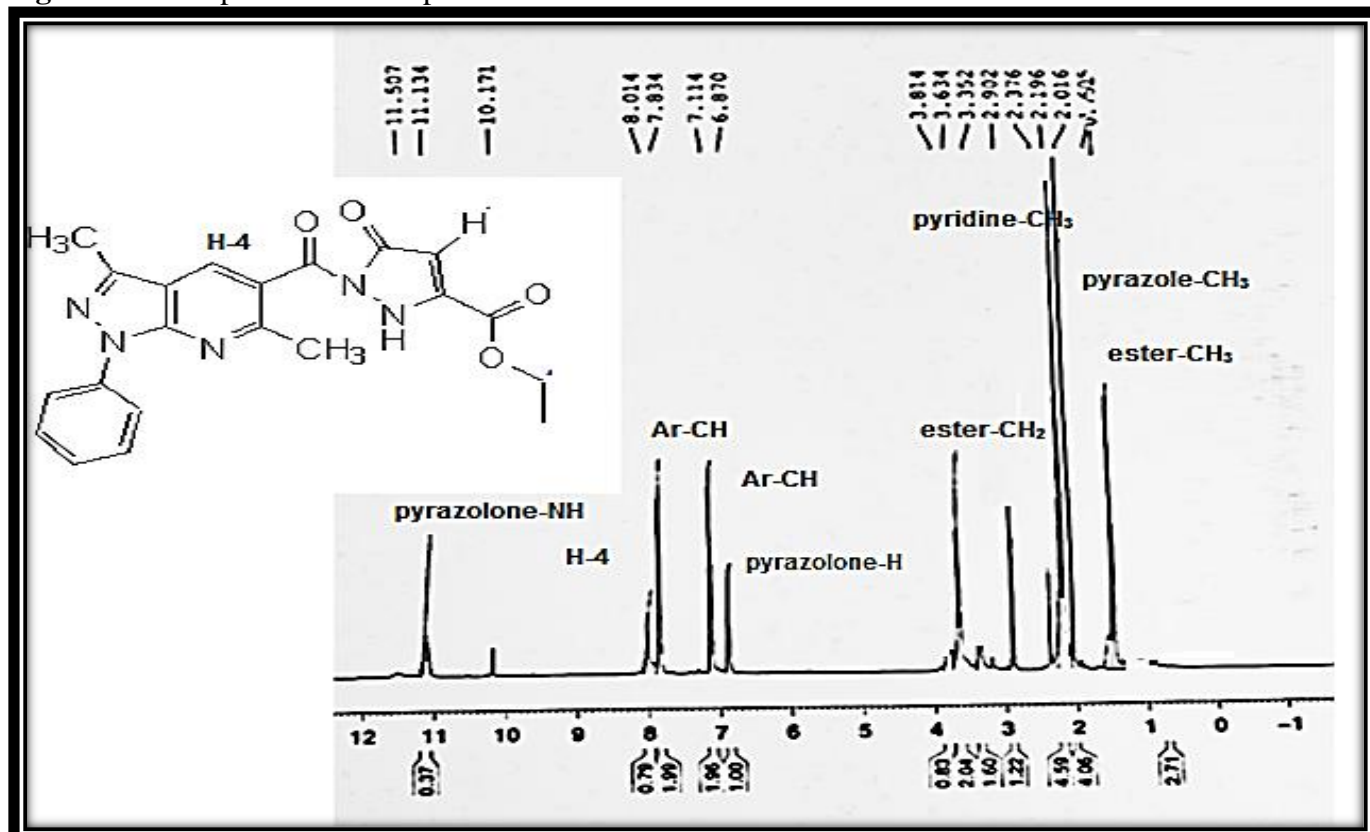

Figure 50. <sup>1</sup>H NMR spectrum of compound 13

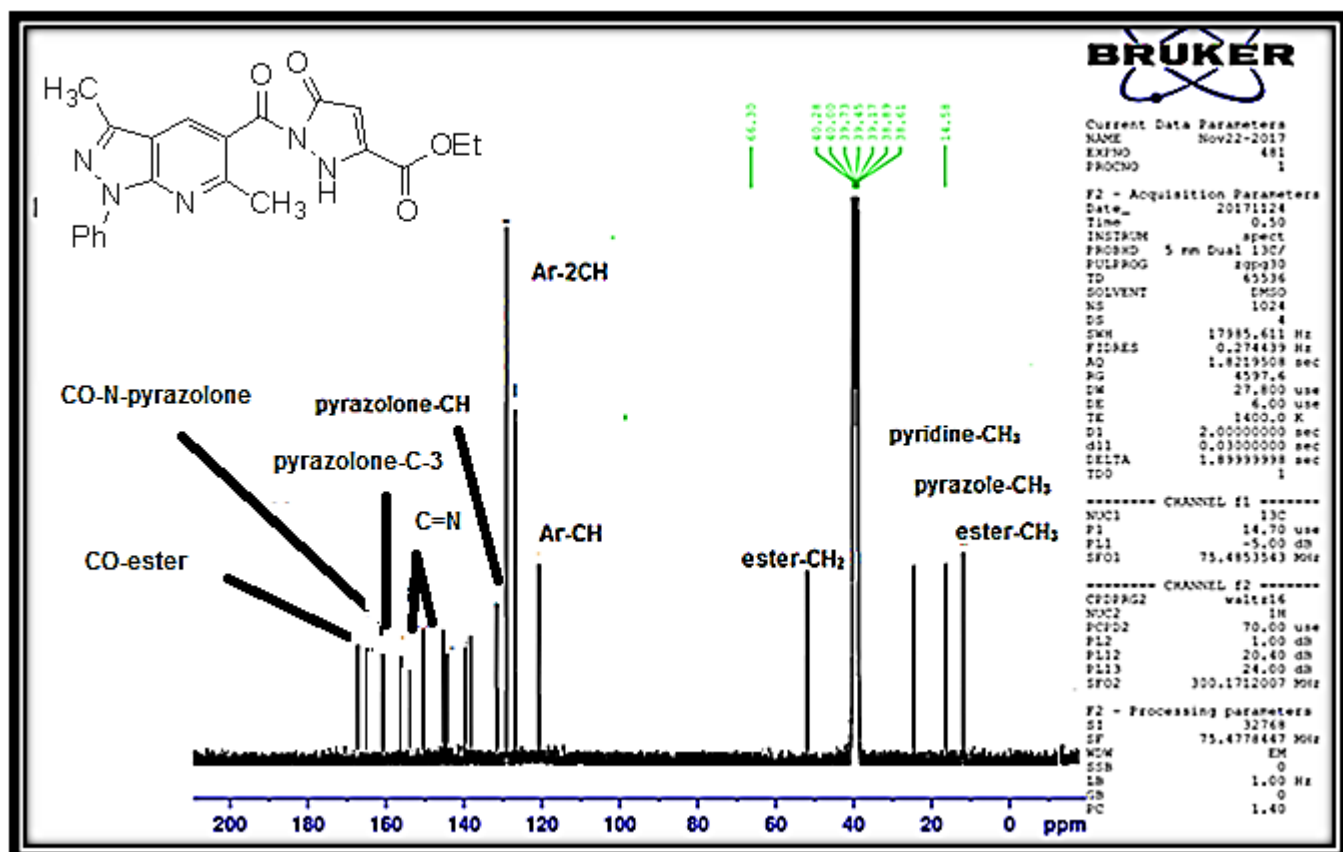

Figure 51. <sup>13</sup>C NMR spectrum of compound 13

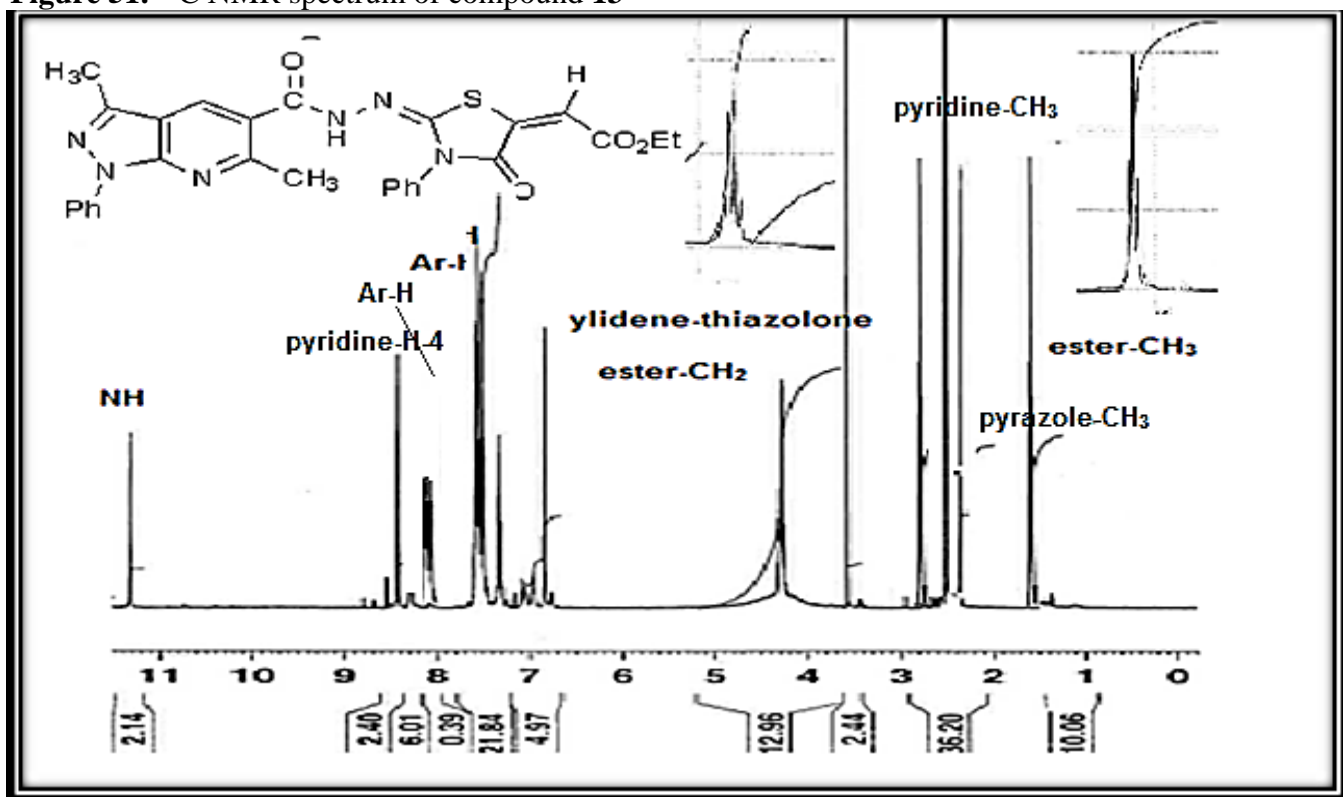

Figure 52. <sup>1</sup>H NMR spectrum of compound 14a

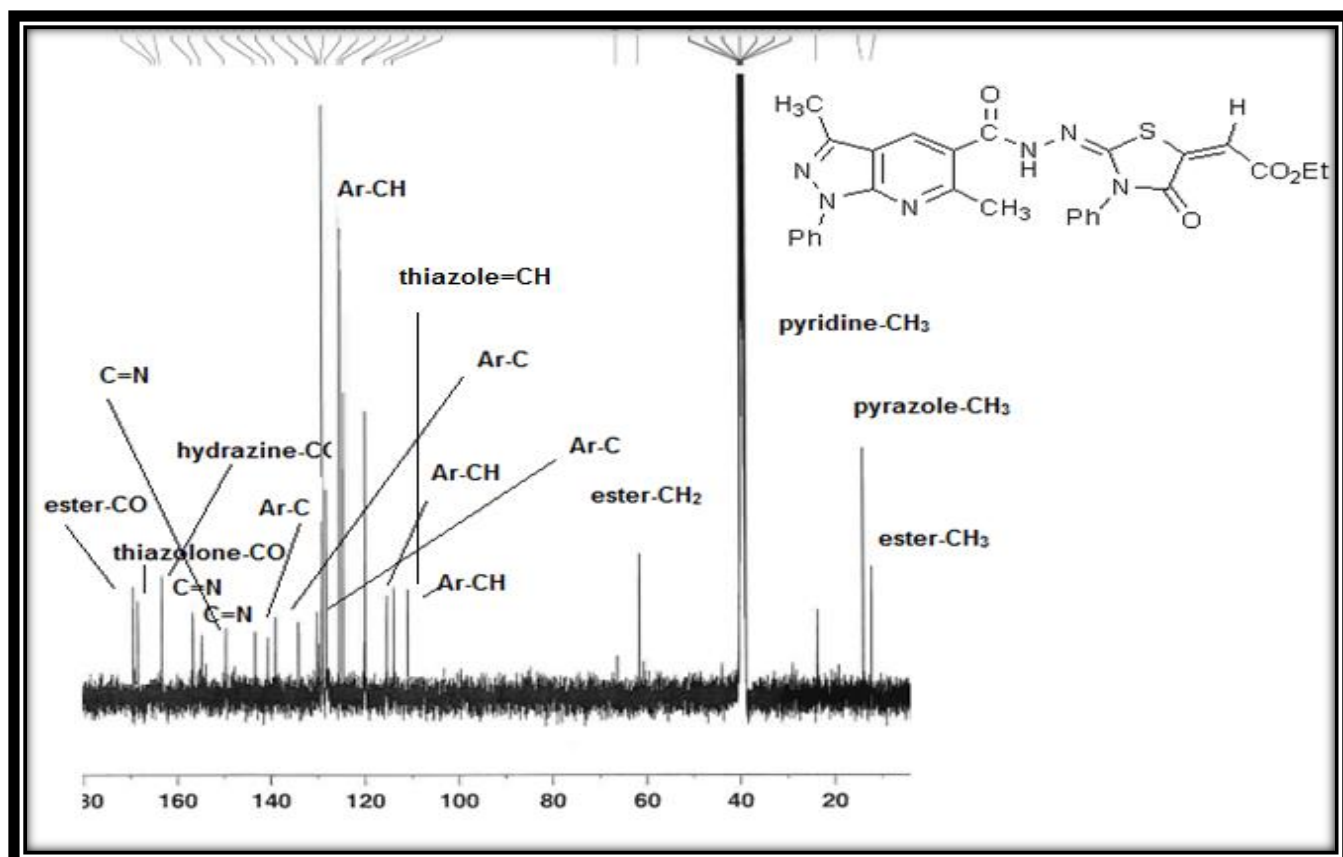

Figure 53.  $^{13}\text{C}$  NMR spectrum of compound 14a

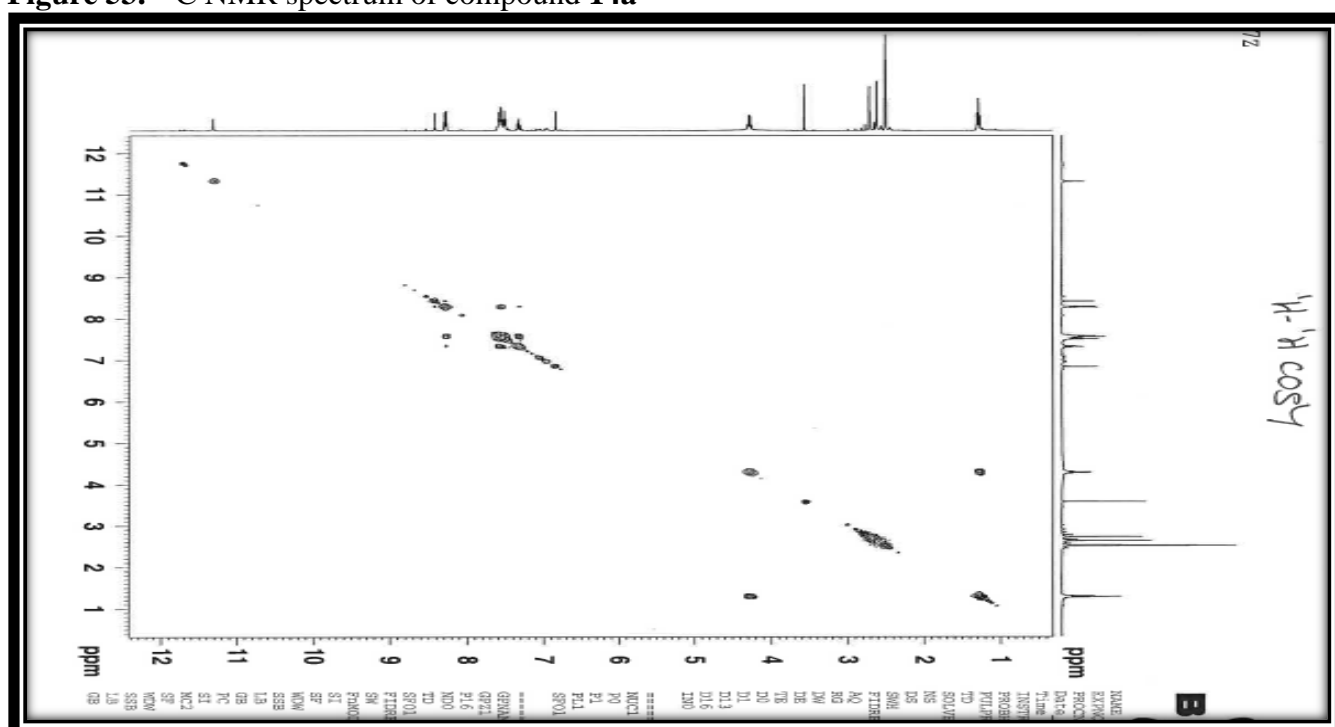

Figure 54. COSY  $^1\text{H}$ - $^1\text{H}$  NMR spectrum of compound 14a

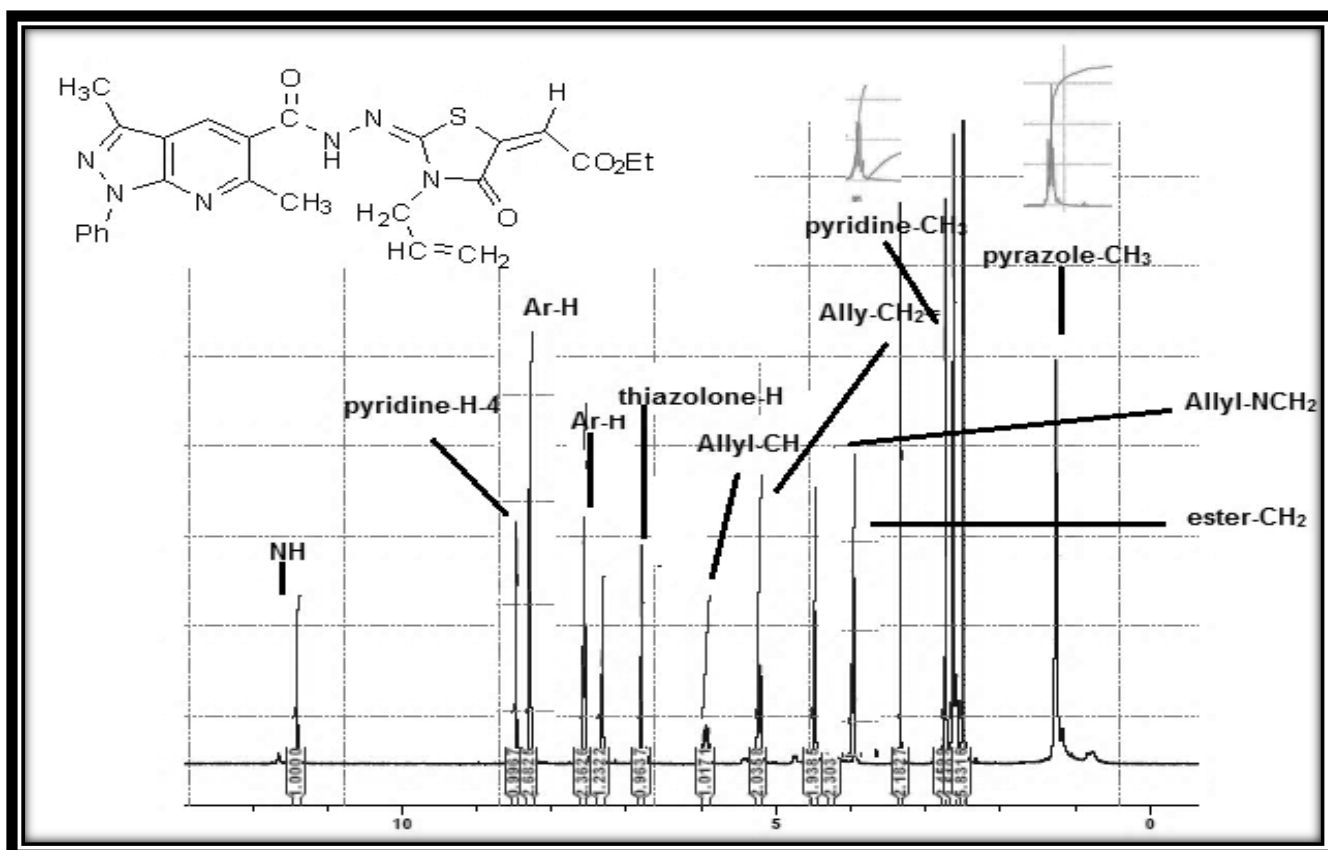

Figure 55.  $^1\text{H}$  NMR spectrum of compound 14b

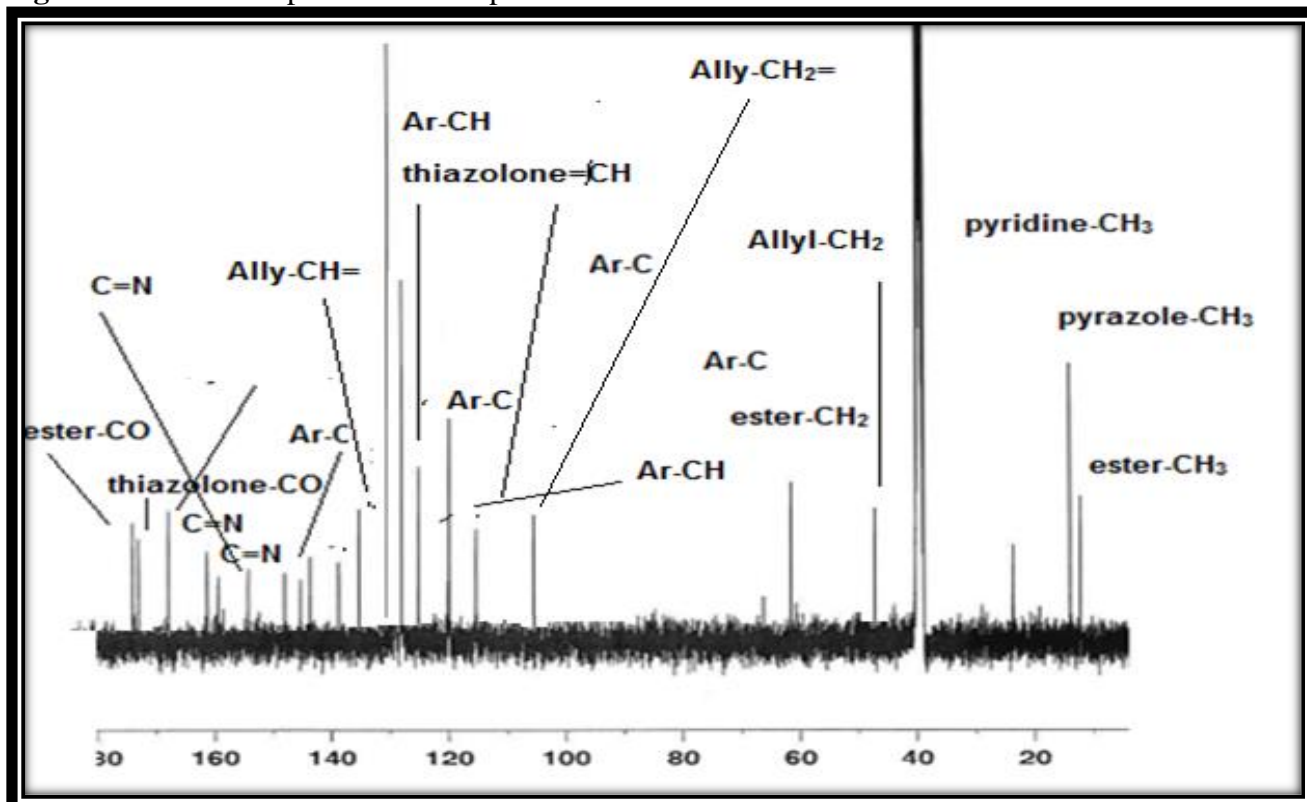

Figure 56.  $^{13}\text{C}$  NMR spectrum of compound 14b

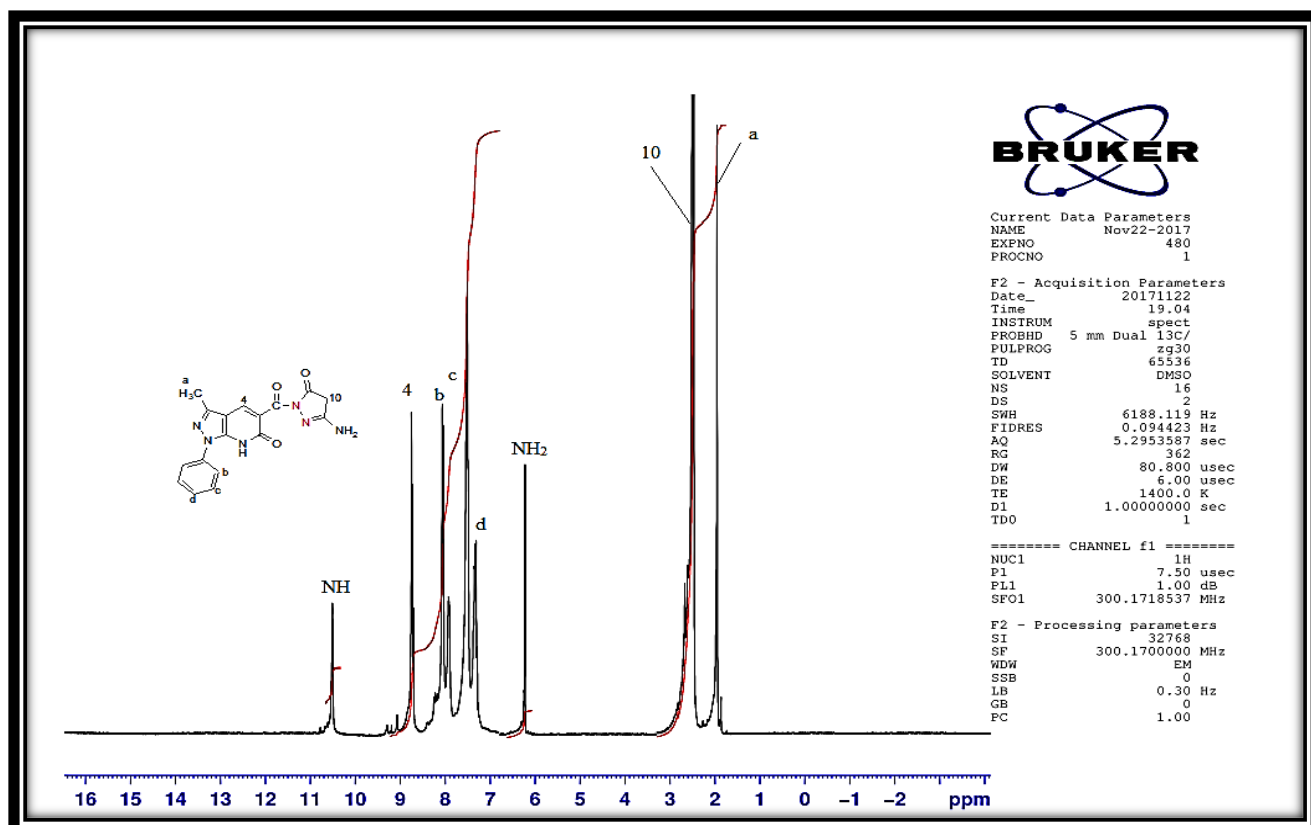

Figure 57.  $^1\text{H}$  NMR spectrum of compound 16

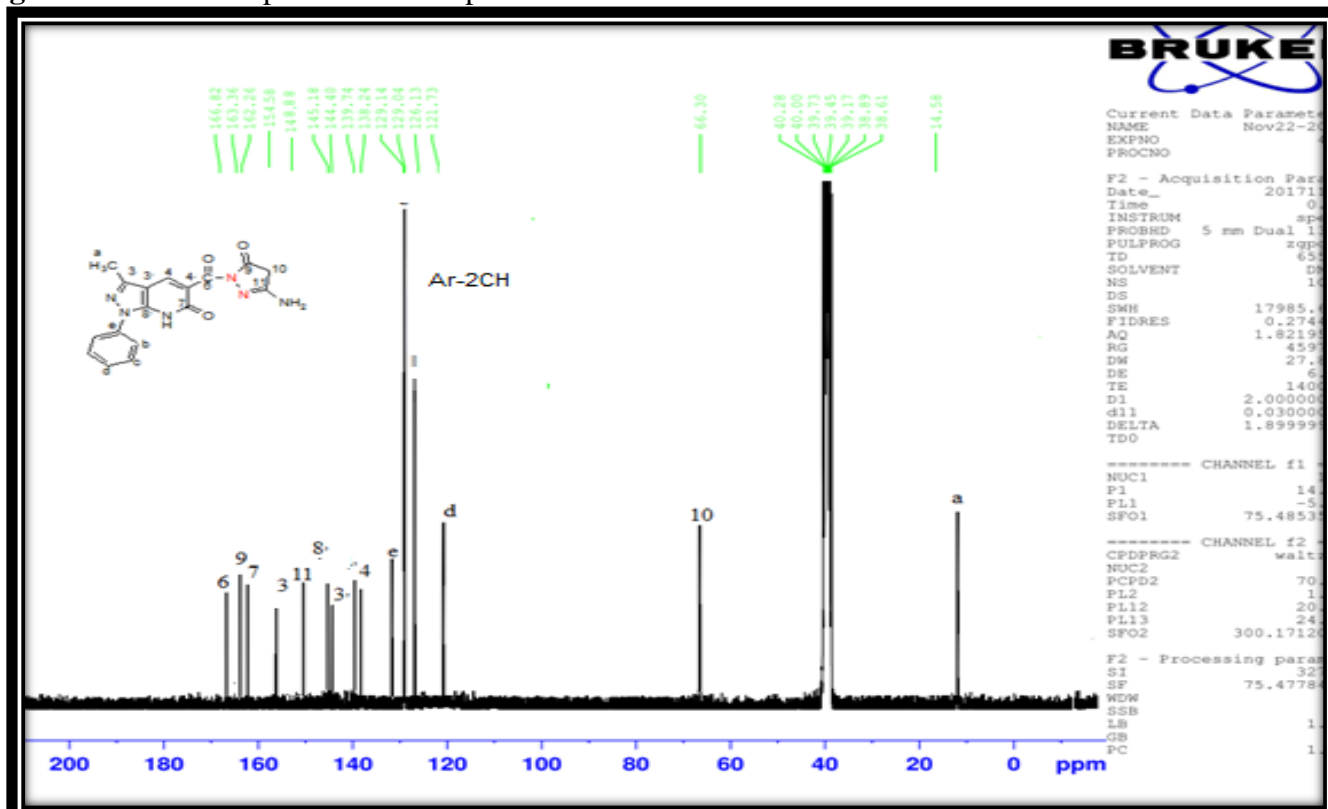

Figure 58.  $^{13}\text{C}$  NMR spectrum of compound 16



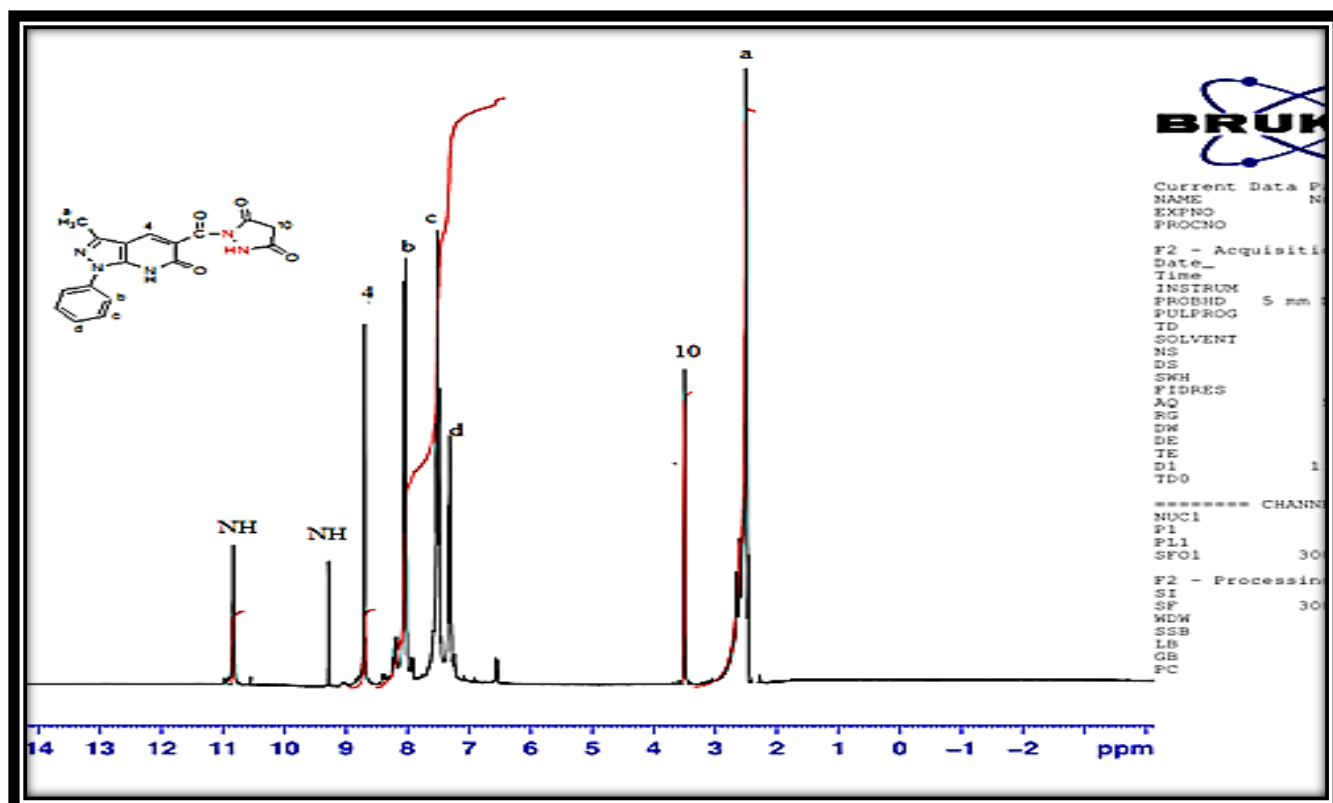

Figure 59.  $^1\text{H}$  NMR spectrum of compound 17

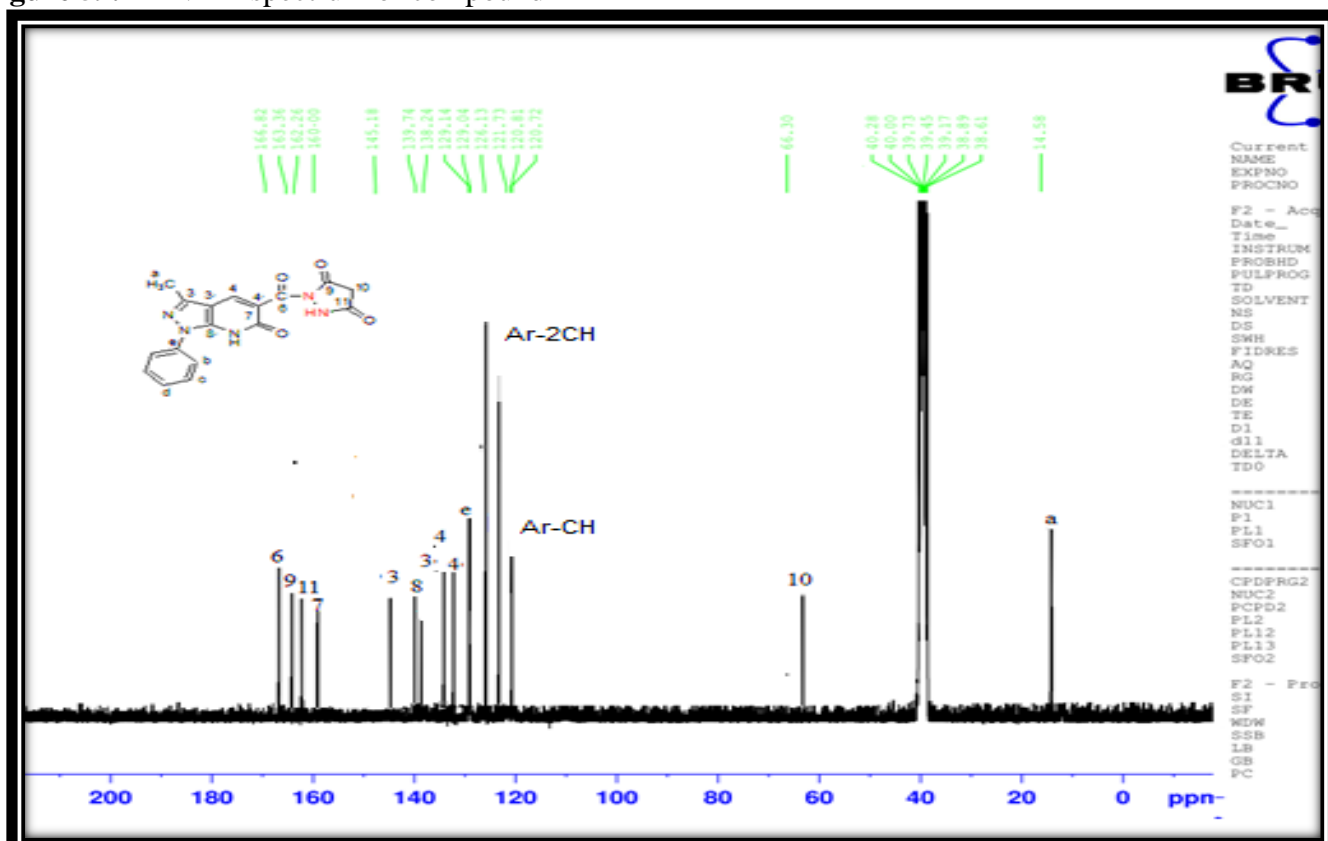

Figure 60.  $^{13}\text{C}$  NMR spectrum of compound 17

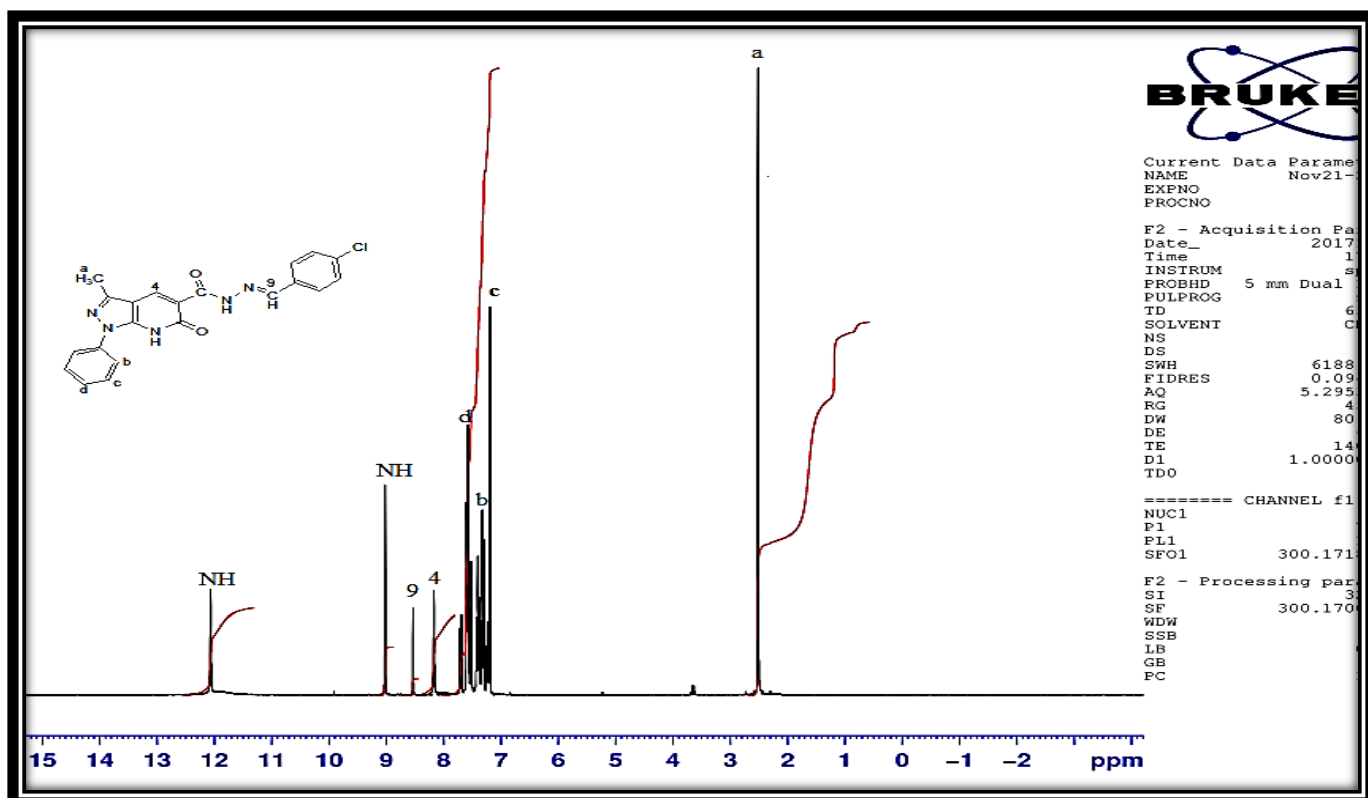

Figure 61.  $^1\text{H}$  NMR spectrum of compound 18

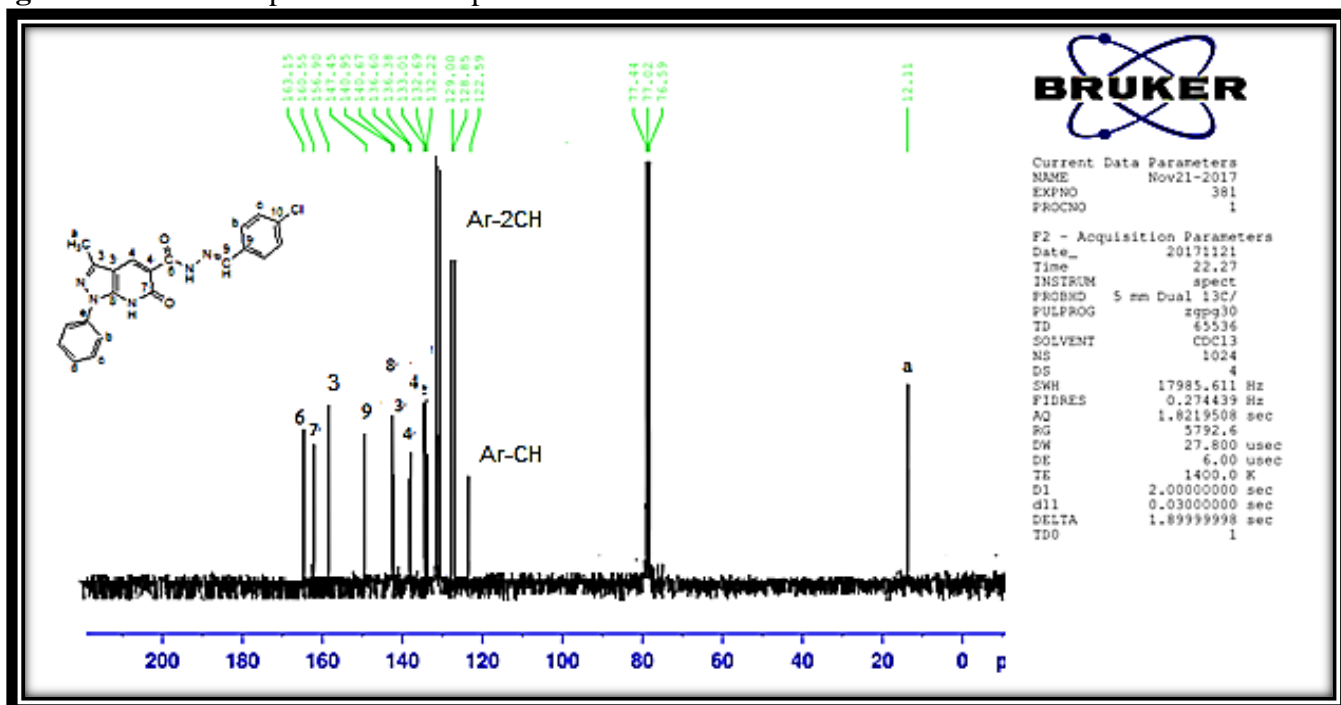

Figure 62.  $^{13}\text{C}$  NMR spectrum of compound 18

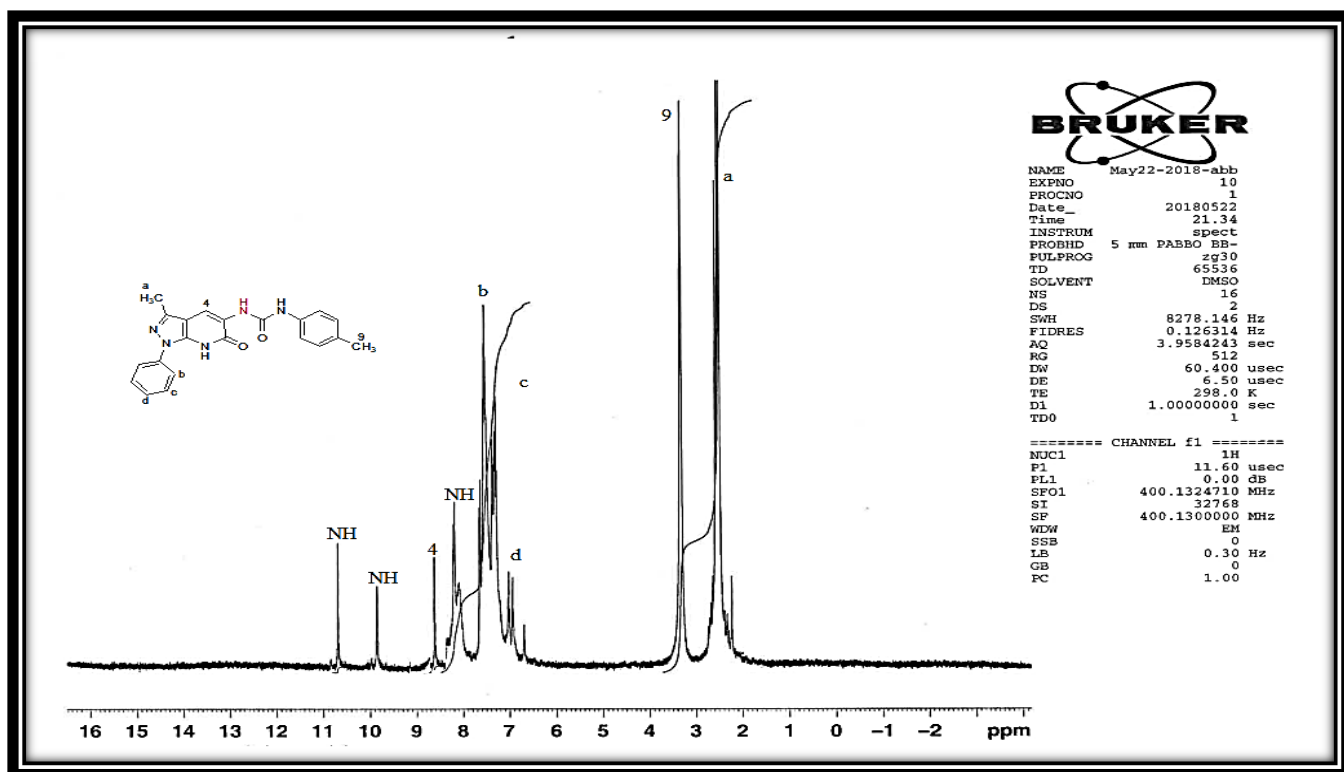

Figure 63. <sup>1</sup>H NMR spectrum of compound 20

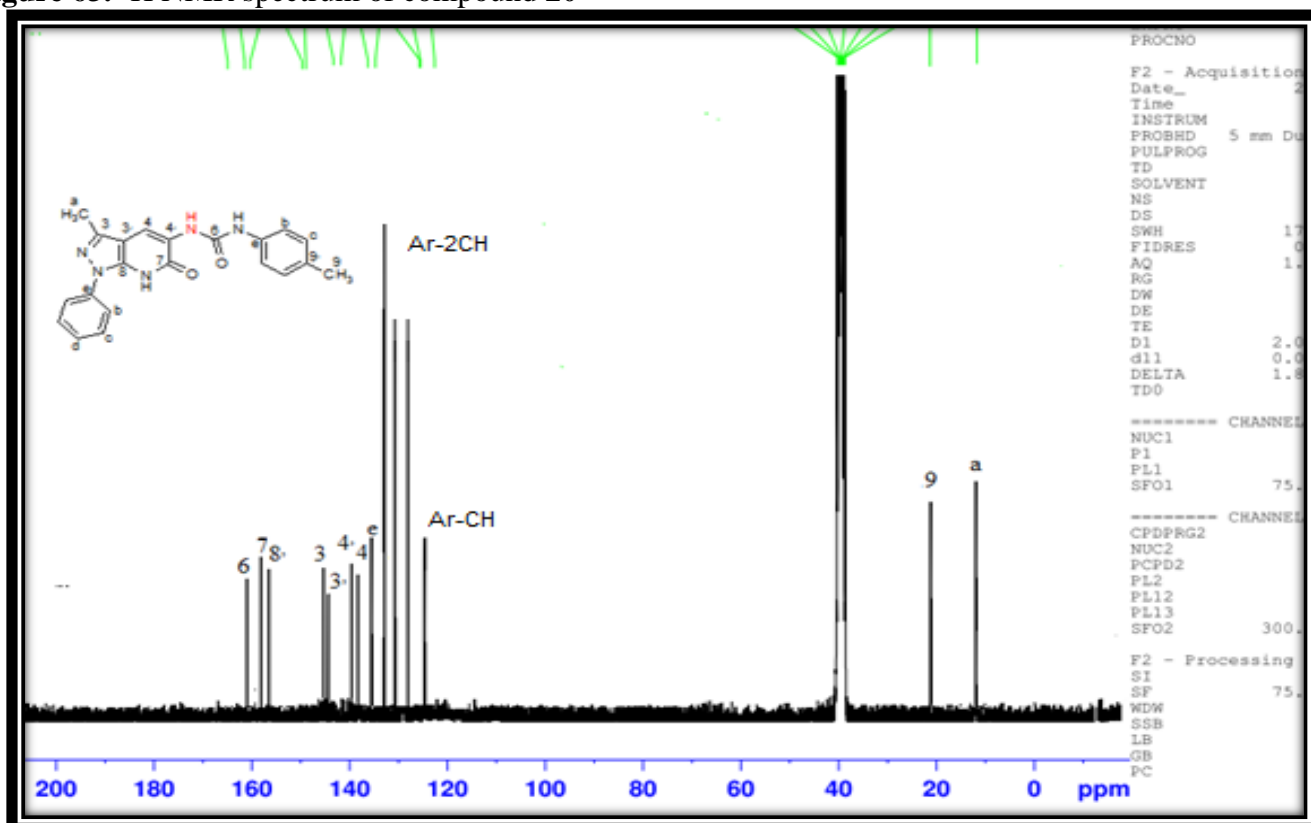

Figure 64. <sup>13</sup>C NMR spectrum of compound 20

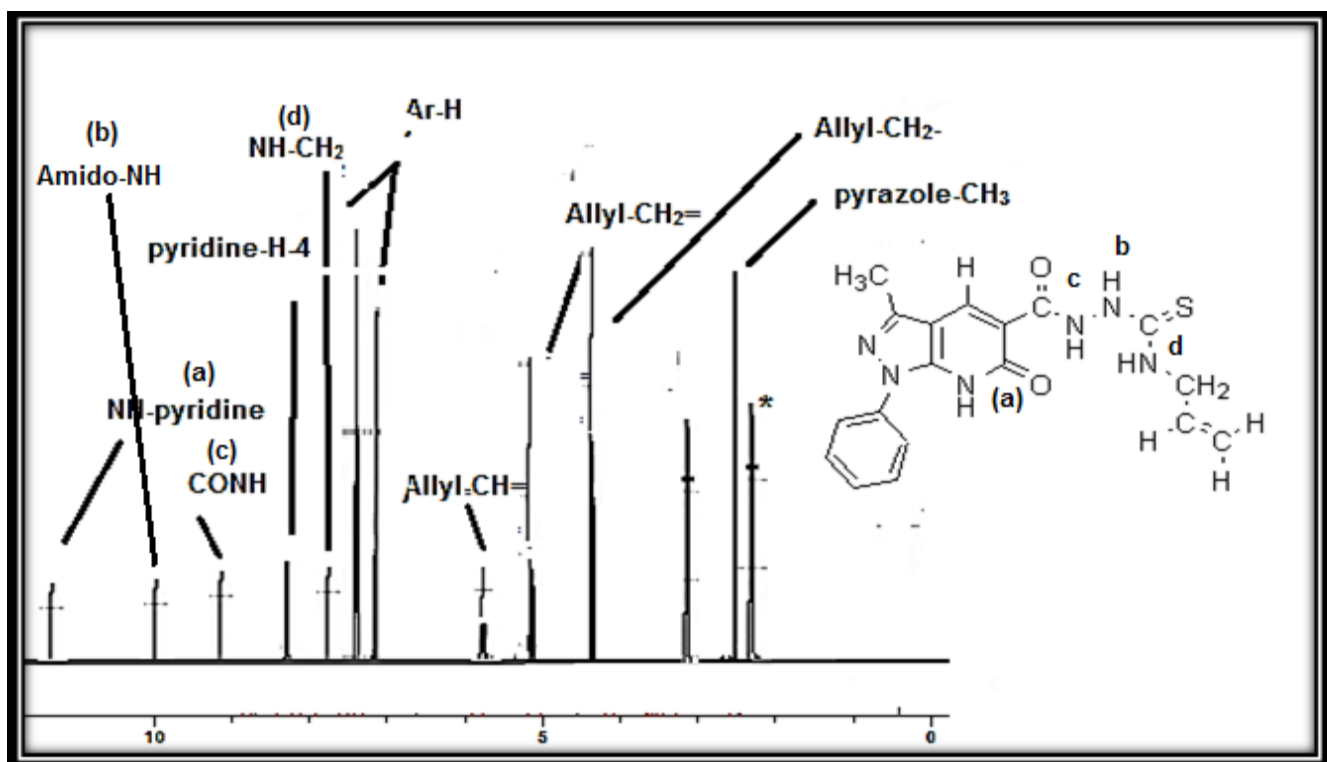

**Figure 65.**  $^1\text{H}$  NMR spectrum of compound 21

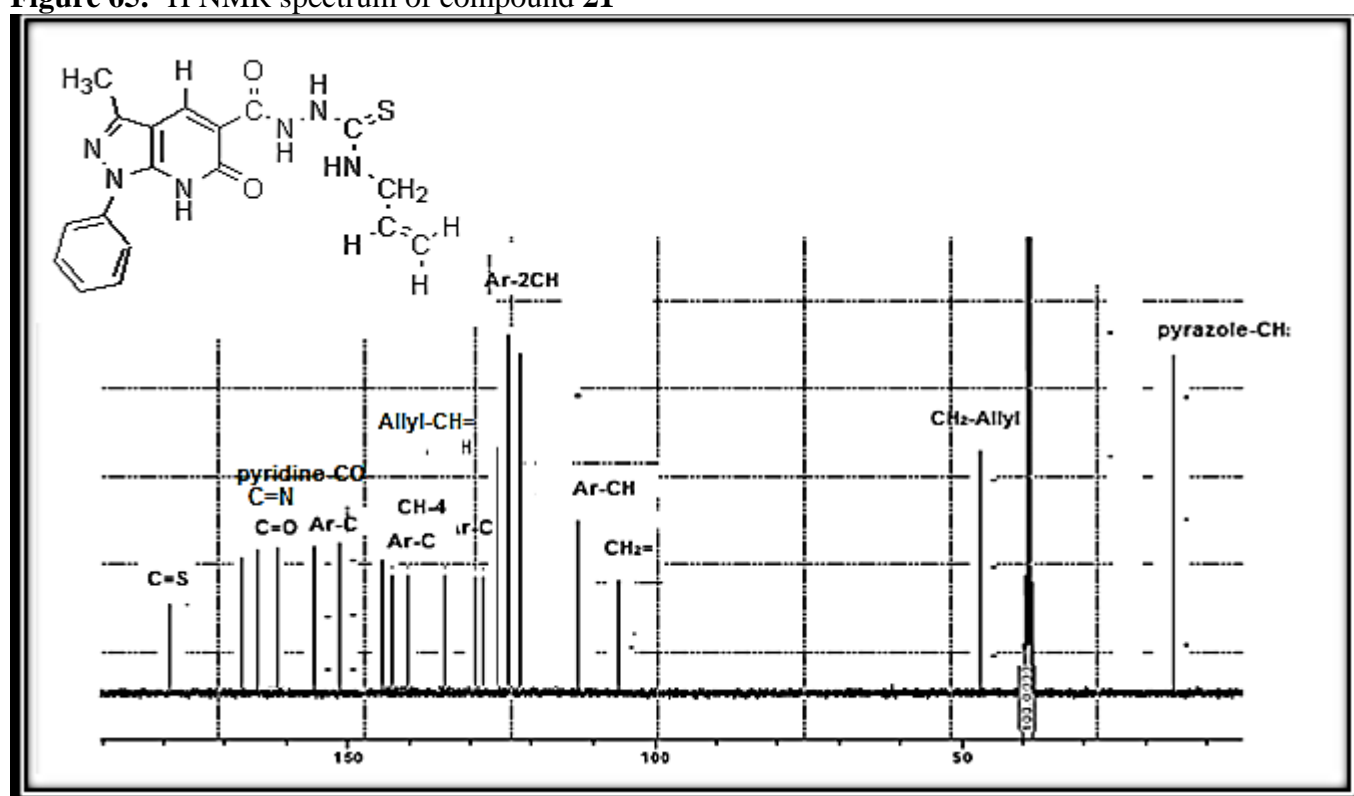

**Figure 66.**  $^{13}\text{C}$  NMR spectrum of compound 21

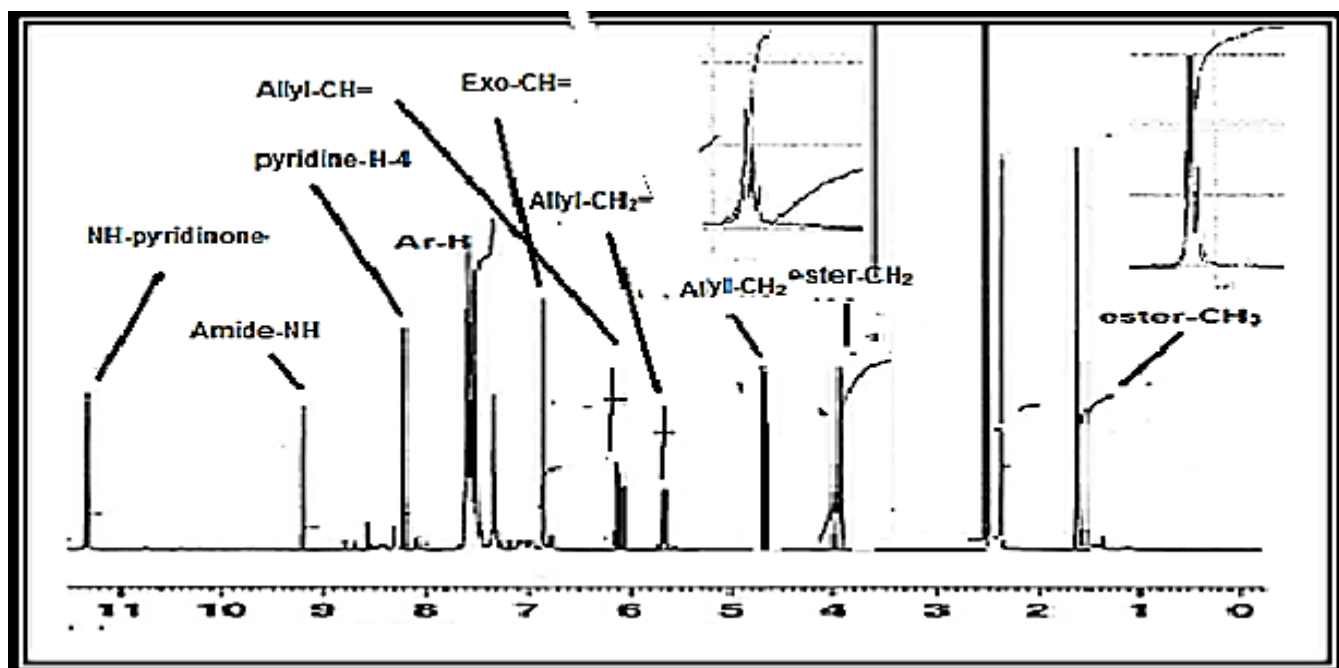

Figure 67.  $^1\text{H}$  NMR spectrum of compound 22

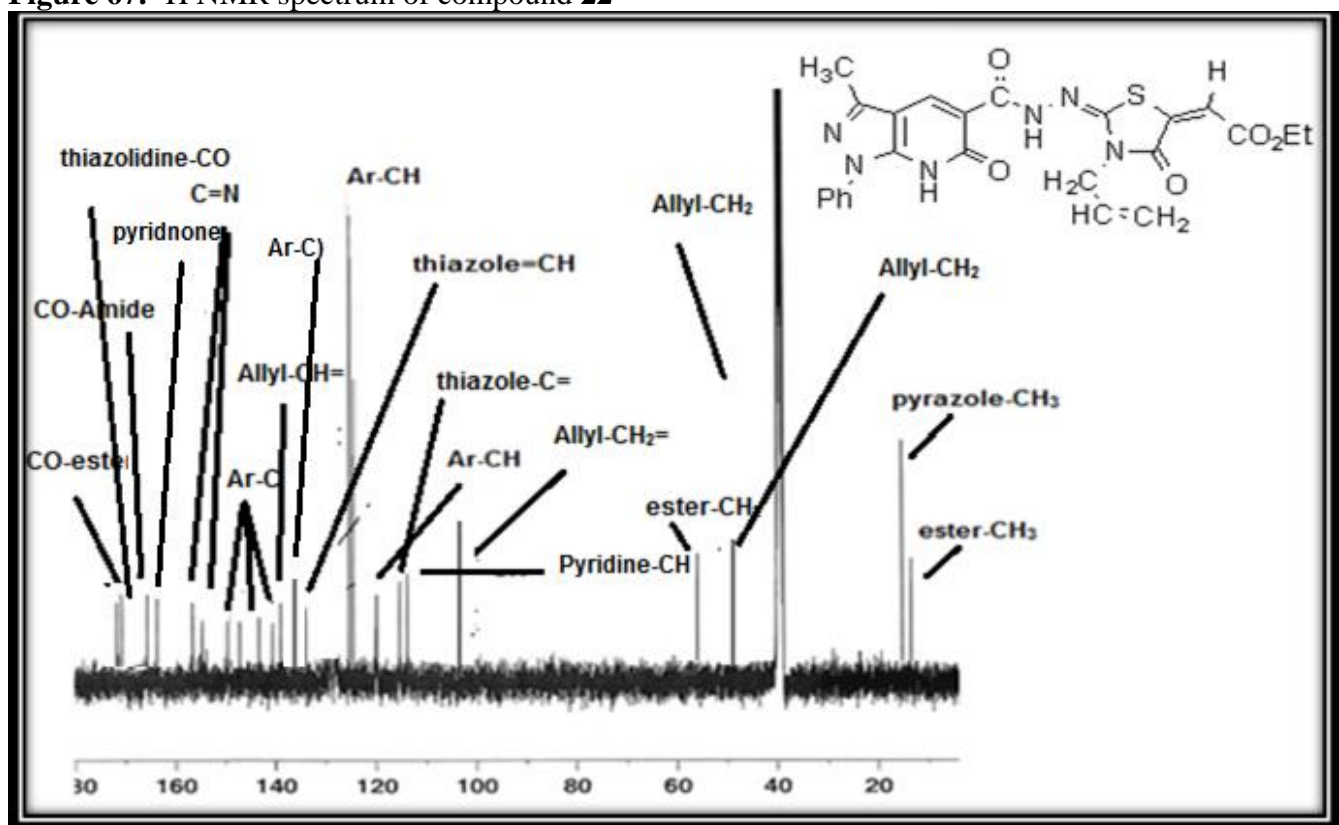

Figure 68.  $^{13}\text{C}$  NMR spectrum of compound 22
